# Supplementary material
Source: PubMed Central journal article supplement (PMC7612480)
Supplement: EMS136099-supplement-Supplementary_Inforamtion.pdf [file EMS136099-supplement-Supplementary_Inforamtion.pdf]

## Supplementary Information

### Engineering an Efficient and Enantioselective Enzyme for the Morita-Baylis-Hillman Reaction

Rebecca Crawshaw<sup>1</sup>, Amy E. Crossley<sup>1</sup>, Linus Johannissen<sup>1</sup>, Ashleigh J. Burke<sup>1</sup>, Sam Hay<sup>1</sup>, Colin Levy<sup>1</sup>, David Baker<sup>2,3,4</sup>, Sarah L. Lovelock<sup>1\*</sup> and Anthony P. Green<sup>1\*</sup>

#### Contents

|                                                                                                                                                   | Page |
|---------------------------------------------------------------------------------------------------------------------------------------------------|------|
| 1. Supplementary Figures 1-13                                                                                                                     |      |
| <b>Figure 1:</b> Directed evolution of BH32.14.                                                                                                   | 2    |
| <b>Figure 2:</b> Kinetic characterization of BH32, BH32.8, BH32.12 and BH32.14.                                                                   | 4    |
| <b>Figure 3:</b> HPLC analysis of the BH32 catalysed MBH reaction.                                                                                | 5    |
| <b>Figure 4:</b> Characterization of product 3 produced from a preparative scale biotransformation.                                               | 6    |
| <b>Figure 5:</b> Total turnover numbers achieved by BH32.14.                                                                                      | 7    |
| <b>Figure 6:</b> Activity of BH32.14 at varying temperatures.                                                                                     | 7    |
| <b>Figure 7:</b> Structural characterization of residues responsible for oxyanion intermediate stabilization in BH32, BH32.6, BH32.7 and BH32.12. | 8    |
| <b>Figure 8:</b> Cluster model used for DFT modelling.                                                                                            | 9    |
| <b>Figure 9:</b> Computed reaction profile for the complete MBH mechanism.                                                                        | 10   |
| <b>Figure 10:</b> DFT states showing reactants, transition states and intermediates formed along the reaction coordinate.                         | 11   |
| <b>Figure 11:</b> Time course for the inhibition of BH32 and variants.                                                                            | 12   |
| <b>Figure 12:</b> DFT state showing inhibitor 4 bound in the active site of an engineered MBHase.                                                 | 12   |
| <b>Figure 13:</b> Solvent kinetic isotope effects                                                                                                 | 13   |
| 2. Supplementary Tables 1-9                                                                                                                       |      |
| <b>Table 1:</b> Experimental and calculated masses of apo and inhibited enzymes.                                                                  | 14   |
| <b>Table 2:</b> Conversion and enantiomeric excess achieved by selected variants along the evolutionary trajectory.                               | 14   |
| <b>Table 3:</b> Kinetic characterization of BH32, BH32.8, BH32.12 and BH32.14.                                                                    | 15   |
| <b>Table 4:</b> Effect of cosolvent on BH32.14 activity.                                                                                          | 15   |
| <b>Table 5:</b> Reaction conditions for the synthesis of 3 & 5a-w.                                                                                | 16   |
| <b>Table 6:</b> SFC analytical methods for MBH adducts 5a-w.                                                                                      | 17   |
| <b>Table 7:</b> Data collection and refinement statistics.                                                                                        | 18   |
| <b>Table 8:</b> Mother liquor composition used for protein crystallization of BH32.6, BH32.7 and BH32.12                                          | 19   |
| <b>Table 9:</b> Primer sequences used to generate DNA libraries                                                                                   | 19   |
| 3. DNA and protein sequence for the most active variant BH32.14                                                                                   | 25   |
| 4. Cartesian coordinates for energy minimised cluster models                                                                                      | 26   |

## 1. Supplementary Figures 1-13

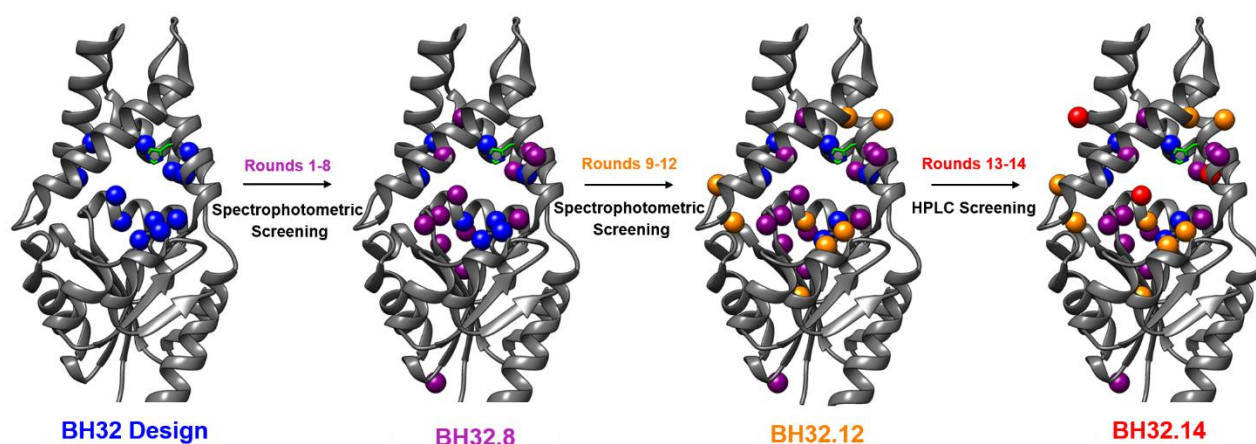

| Round | Description                                                                                                                                                                                    | Clones Screened | Beneficial mutations                        | Best Variant <sup>[1]</sup>                           |
|-------|------------------------------------------------------------------------------------------------------------------------------------------------------------------------------------------------|-----------------|---------------------------------------------|-------------------------------------------------------|
| 1     | Random mutagenesis of the entire gene                                                                                                                                                          | 1800            | T49A, A52V, F87L, Q96R, M120L, K167I, V226G | <b>BH32.1</b> = <i>BH32</i> <sup>[2]</sup> + T49A     |
| 2     | Saturation mutagenesis of 'hotspots': Y45/T49 and F87/F88 (two sites simultaneously randomized), T49, R50                                                                                      | 1980            | T49A, T49M, F87L, F87T                      | <b>BH32.2</b> = <i>BH32</i> + T49A_F87L               |
| 3     | Random mutagenesis of the entire gene                                                                                                                                                          | 1800            | N14Y, M130K, E174G                          | <b>BH32.3</b> = <i>BH32.2</i> + N14Y                  |
| 4     | Saturation mutagenesis of 'hotspots': N14, M130, E174                                                                                                                                          | 270             | N14I, M130T, E174G                          | <b>BH32.4</b> = <i>BH32.2</i> + N14I_M130T            |
| 5     | Saturation mutagenesis of active site positions and flexible loop regions: L10, A19, P38, L42, Y45, E46, P60, P63, F81, S91, Q96, S124, D125, Q128, M130, L133, F154, K167, E174, K202         | 1800            | P63C, S124R, D125Q, Q128P, E174K            | <b>BH32.5</b> = <i>BH32.4</i> + S124R_Q128P_E174K     |
| 6     | Saturation mutagenesis of active site positions and flexible loop regions: V16, E17, G32, Y34, L36, Y61, L64, L68, M120, T122, D123, D125, T126, Q128, E149, G152, L199, E204, K205, E207      | 1800            | D123N, P128L, E204G                         | <b>BH32.6</b> = <i>BH32.5</i> + D123N                 |
| 7     | Saturation mutagenesis of positions: S22/S95 and M120/T122 (two sites simultaneously randomized)                                                                                               | 2700            | S22V_S95A, M120V_T122L                      | <b>BH32.7</b> = <i>BH32.6</i> + S22V_S95A_M120V_T122L |
| 8     | Saturation mutagenesis of active site positions and flexible loop regions: L10, A20, L24, M27, L42, T45, P63, L64, S91, L92, Q96, D125, E127, A129, I145, T147                                 | 1440            | A20Y, A129G                                 | <b>BH32.8</b> = <i>BH32.7</i> + A20Y                  |
| 9     | Saturation mutagenesis of active site positions and flexible loop regions: L10, L24, L42, E46, A129                                                                                            | 450             | L10W, L24F, L42V, A129S                     | <b>BH32.9</b> = <i>BH32.8</i> + L10W_L24F_A129S       |
| 10    | Random mutagenesis of the entire gene                                                                                                                                                          | 1800            | F154S                                       |                                                       |
| 11    | Saturation mutagenesis of F154                                                                                                                                                                 | 90              | F154S                                       | <b>BH32.11</b> = <i>BH32.9</i> + F154S                |
| 12    | Saturation mutagenesis of active site positions and flexible loop regions: Y20, V30, K47, Y56, I67, E70, F87, S91, R97, F153, K155, F161, L165, K171, V176, Y177, D180, S196, D210, L219, I223 | 1890            | K47E, Y56N, Y177C, D180P, D210G,            | <b>BH32.12</b> = <i>BH32.11</i> + Y56N_Y177C_D180P    |
| 13    | Random mutagenesis of the entire gene                                                                                                                                                          | 1800            | V16A, A19T, E70R, P128L, S154A              | <b>BH32.13</b> = <i>BH32.12</i> + A19T                |
| 14    | Saturation mutagenesis of 'hotspots': V16, A19, E70, M72, E89, P128, S154                                                                                                                      | 630             | V16P/G, A19T, E70R, P128L/M, S154G/A        | <b>BH32.14</b> = <i>BH32.12</i> + A19T_E70R_P128L     |

<sup>[1]</sup> The gene sequence used as the template for each round of evolution is shown in italics.

<sup>[2]</sup> BH32 = haloacid dehalogenase from *Pyrococcus horikoshii* + F9S, V10L, L14N, E19A, T22S, I64L, E68L H91S, H95S, Y128Q, L129A, H132F mutations

**Figure 1: Directed evolution of BH32.14.** Structures showing the amino acid positions mutated throughout evolution (represented as spheres). The original design contains twelve active site mutations (shown in blue) built into the cap domain of a haloacid dehalogenase from *Pyrococcus horikoshii*.<sup>20</sup> Fifteen mutations (shown in purple) were introduced during the first eight rounds of evolution, which exploited a spectrophotometric assay. Rounds 9-14 exploited a HPLC assay and led to the accumulation of a further nine mutations (mutations from round 9-12 are shown in orange, and from rounds 13-14 in red). The final variant BH32.14 contains 29 mutations, 5 that remain from the initial computational design and 24 that were installed during evolution. The table describes the method of library generation used, the number of clones evaluated and the sequence of the most improved variant for each round.

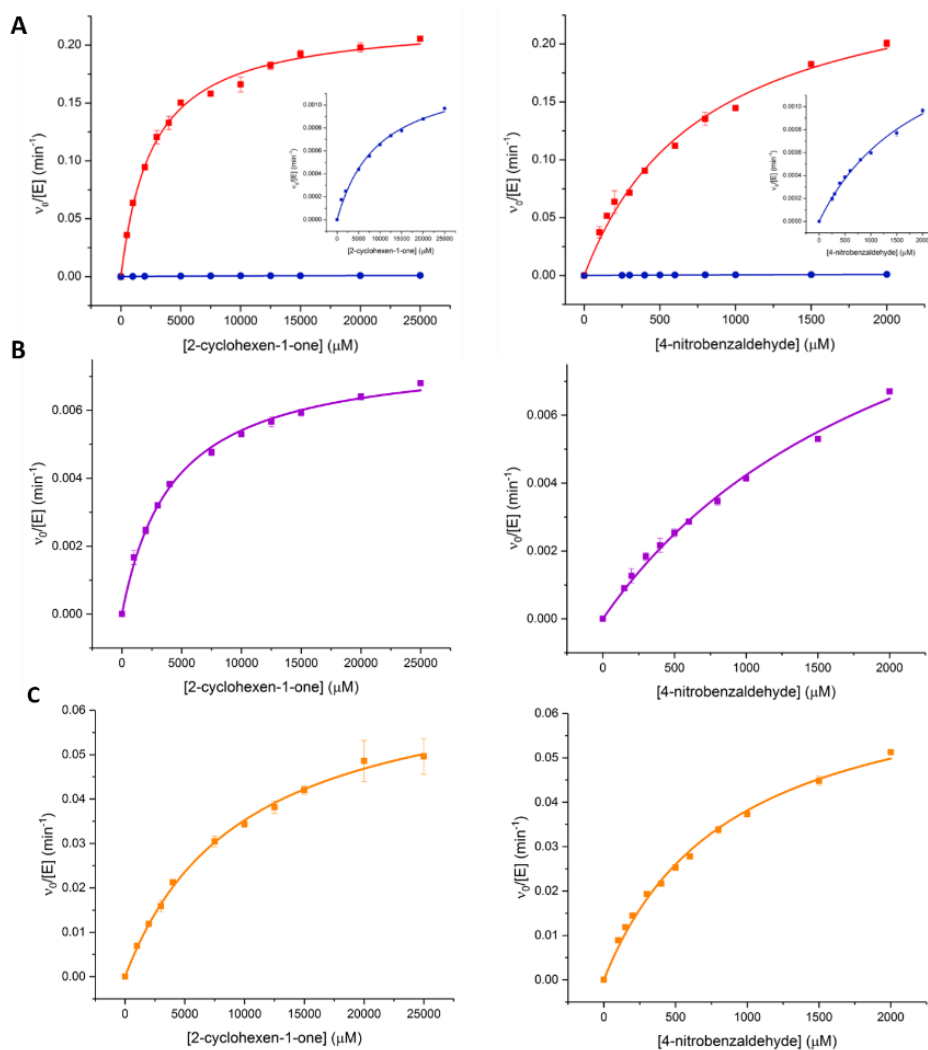

**Figure 2: Kinetic characterization of BH32, BH32.8, BH32.12 and BH32.14.** Michaelis-Menten plots for the MBH reaction with **1** and **2** catalysed by **A**) BH32 (blue) and BH32.14 (red) **B**) BH32.8 and **C**) BH32.12. Kinetic assays were performed at either a fixed concentration of **1** (25 mM) and various concentrations of **2**, or using a fixed concentration of **2** (2 mM) and various concentrations of **1**. The plots show the averaged initial rates which were fitted to the Michaelis–Menten equation using Origin software. Data are mean  $\pm$  s.d. of measurements made in triplicate

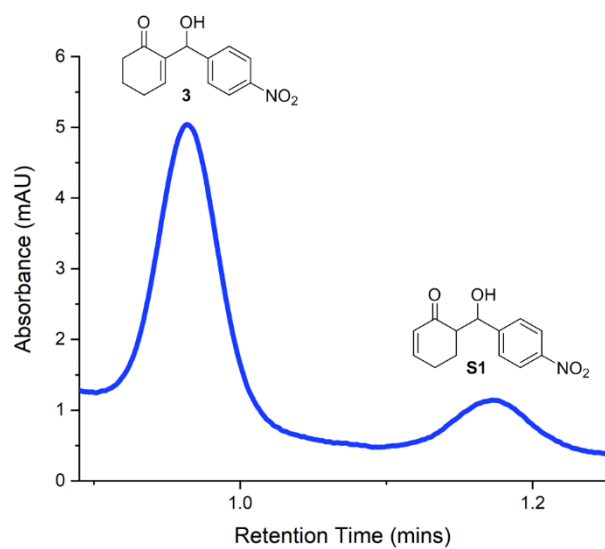

**Figure 3: HPLC analysis of the BH32 catalysed MBH reaction.** HPLC trace showing product **3** and aldol by-product **S1** (5:1 ratio of **3**:**S1**), formed during the BH32 (3 mol%) catalysed reaction of **1** (3 mM) and **2** (0.6 mM) following 22 hours incubation.

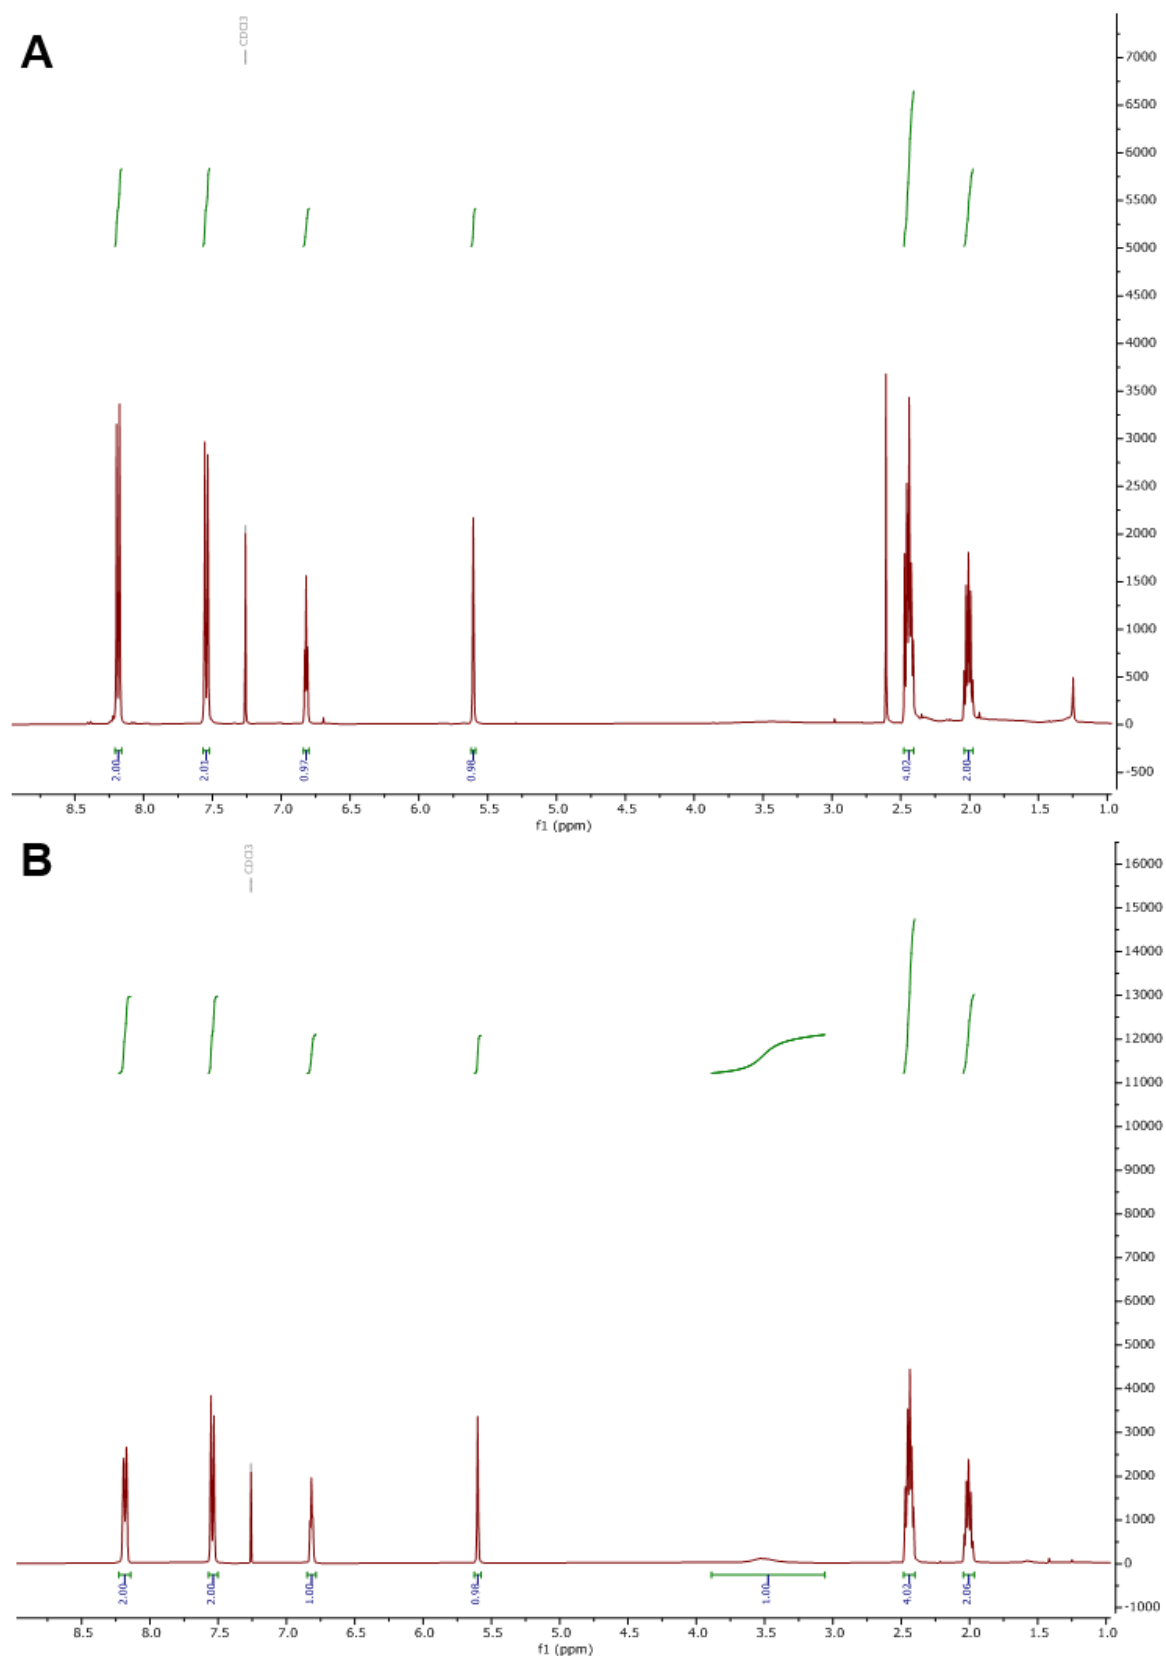

**Figure 4: Characterization of product 3 produced from a preparative scale biotransformation.** NMR traces (400 MHz; CDCl<sub>3</sub>) showing **A**) crude product extracted from the BH32.14 (50 μM) catalysed MBH reaction of **1** (50 mM) and **2** (10 mM) in PBS (pH 7.4) with 20% DMSO as a cosolvent and **B**) product isolated following purification by flash column chromatography.

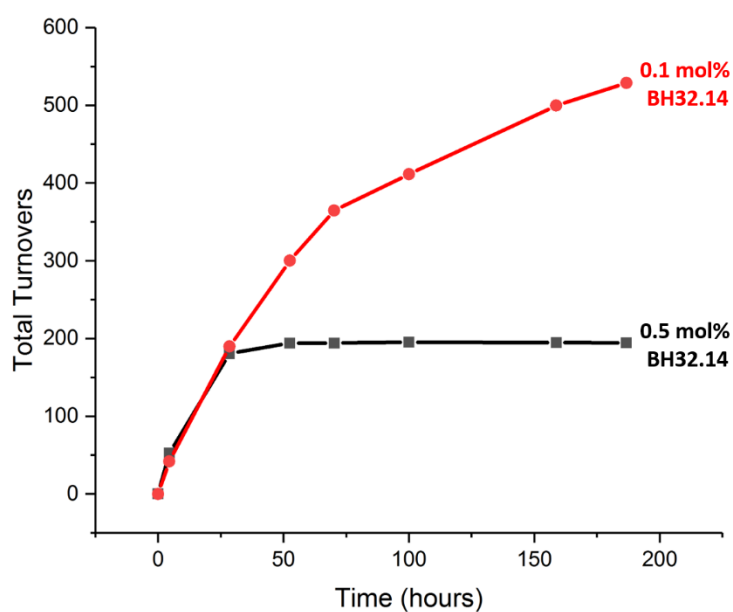

**Figure 5: Total turnover numbers achieved by BH32.14.** Time-course for the conversion of **1** (50 mM) and **2** (10 mM) in PBS (pH 7.4) with 20 % DMSO cosolvent using 0.5 mol% (black) and 0.1 mol% (red) of BH32.14 as a biocatalyst.

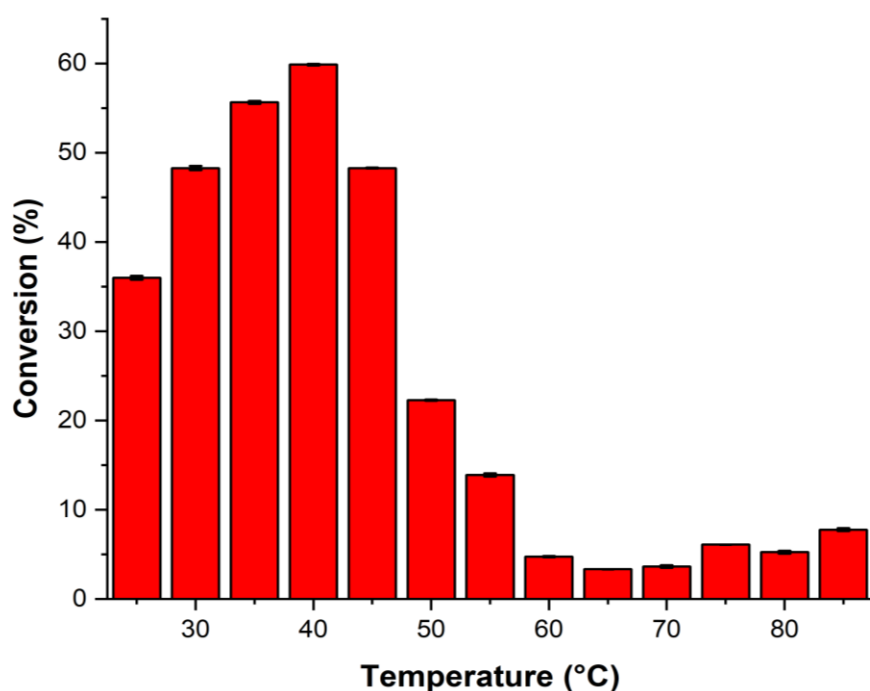

**Figure 6: Activity of BH32.14 at varying temperatures.** Reaction conversions of BH32.14 mediated biotransformations at temperatures ranging from 25 °C to 85 °C. Biotransformations performed using **1** (50mM), **2** (10mM) and BH32.14 (50  $\mu$ M) in PBS (pH 7.4) with 20% DMSO as a cosolvent, for 4 hours. The error bars represent the standard deviation of measurements made in triplicate.

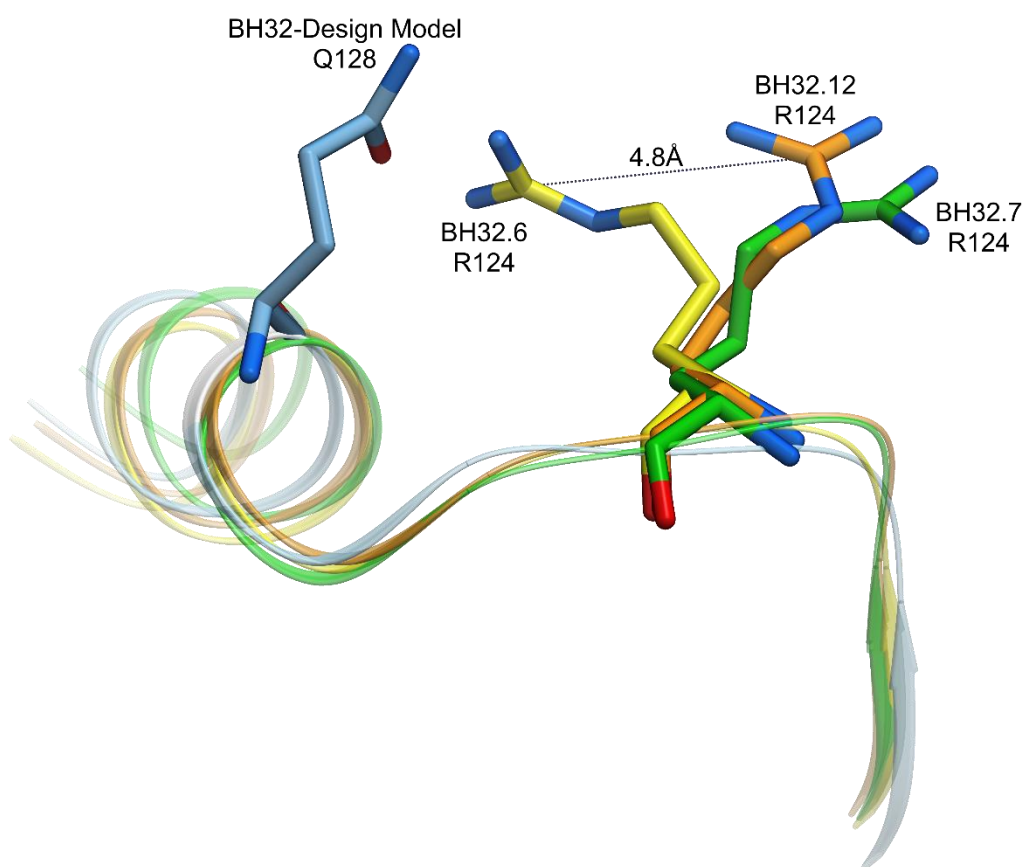

**Figure 7: Structural characterization of residues responsible for oxyanion intermediate stabilization in BH32, BH32.6, BH32.7 and BH32.12.** Four superimposed structures are displayed, the BH32 design model in blue, BH32.6 in yellow, BH32.7 in green and BH32.12 in orange. Backbone atoms are displayed in cartoon ribbon representation whilst residues are shown as all atom coloured stick models. The catalytic Arg124 in BH32.6 adopts an orientation that places the guanidinium motif in close proximity to the amide side chain of Gln128 designed to interact with the oxyanion of *Int1*. During the evolution process, Arg124 reorientates to adopt a pose ideal to support charge transfer during catalysis (BH32.12 orange).



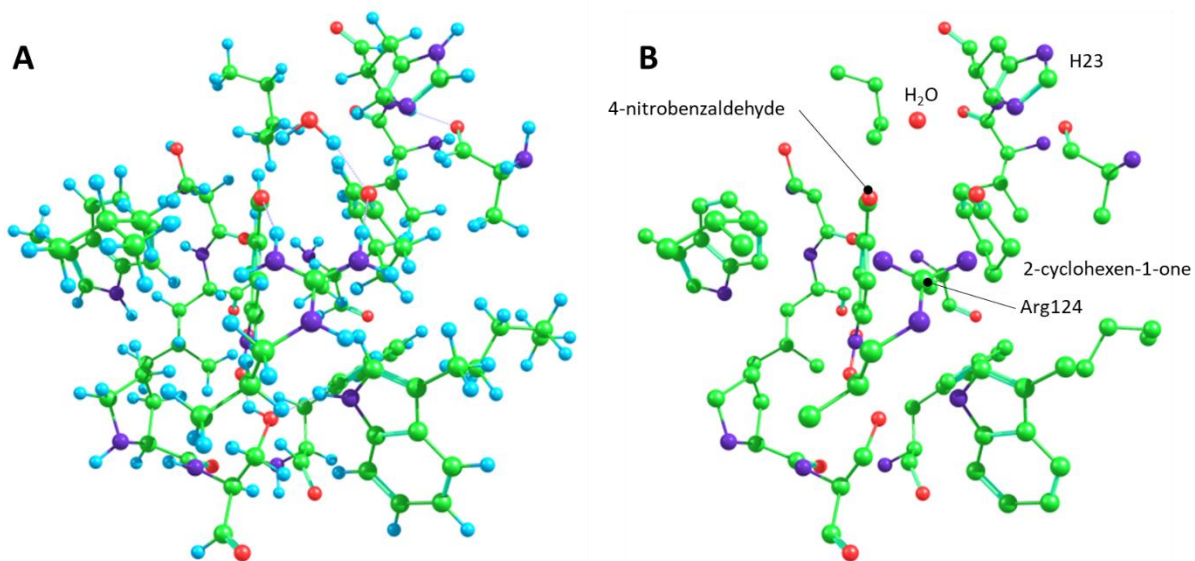

**Figure 8.** Cluster model used for DFT modelling. Models are shown with **(A)** and without **(B)** hydrogen atoms.

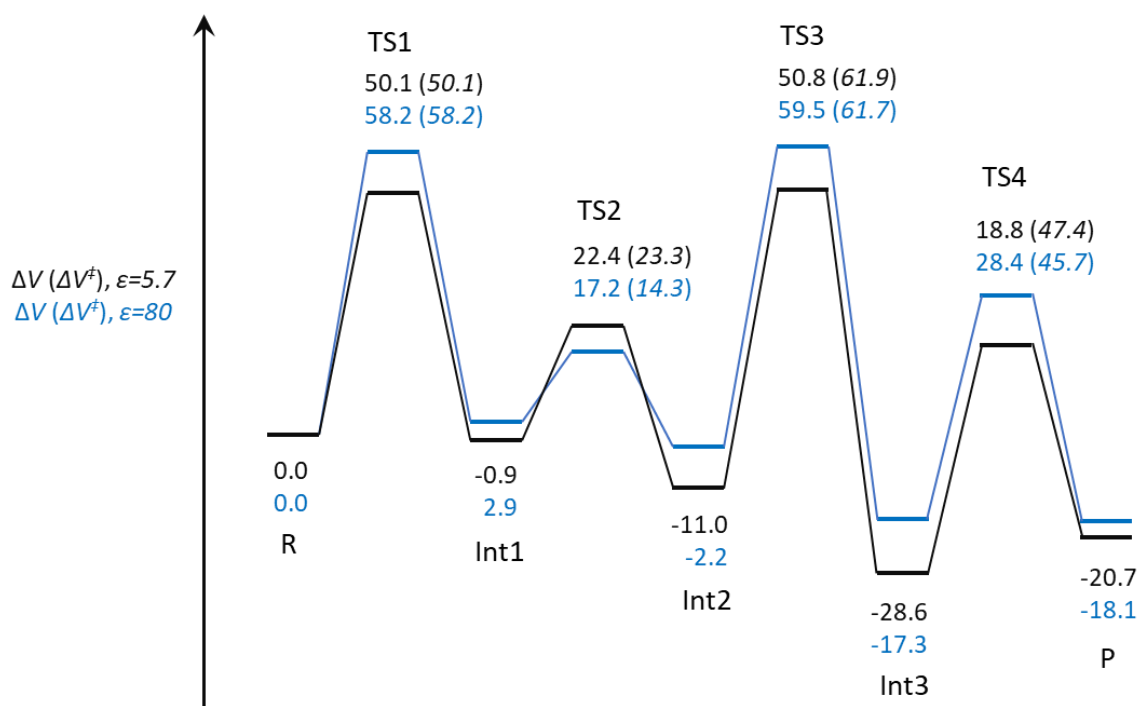

**Figure 9: Computed reaction profile for the complete MBH mechanism.** The potential energy relative to the reactant ( $\Delta V$  in  $\text{kJ mol}^{-1}$ ) is shown for each state, and the barrier energy ( $\Delta V^\ddagger$  in  $\text{kJ mol}^{-1}$ ) for each transition state is shown in parentheses. Geometry optimization was performed using a dielectric,  $\epsilon = 5.7$  (black). Single point calculations using  $\epsilon = 80$  (blue) show only modest changes in energy of each species, with no change in rate limiting step.

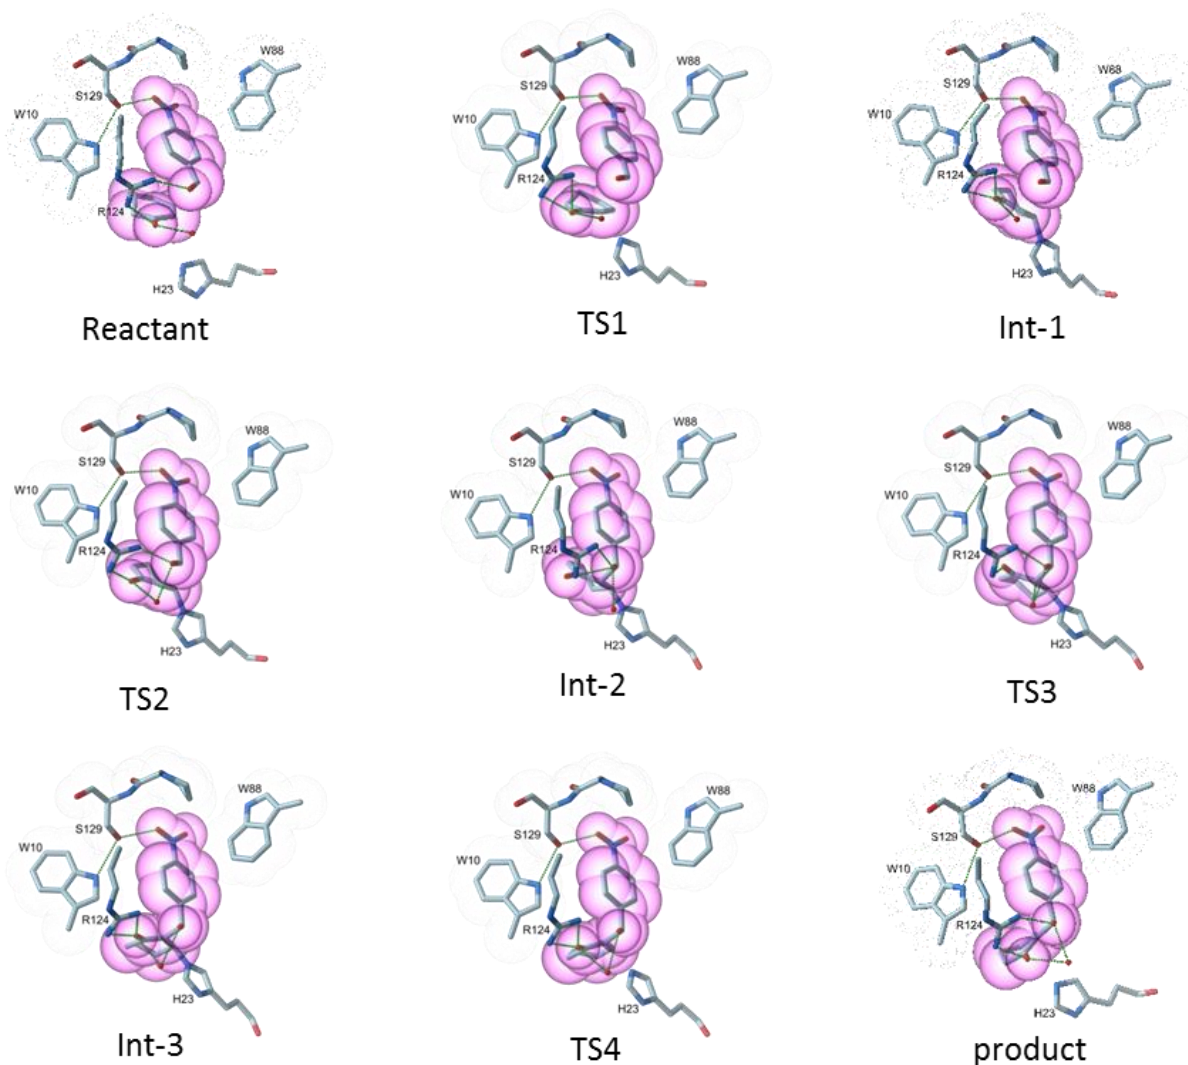

**Figure 10: DFT states showing reactants, transition states and intermediates formed along the reaction coordinate.** Stick representations of the complete DFT progression from reactant through to products are presented in all atom colours. For clarity a subset of atoms that form close packing interactions with the substrates are shown along with atoms derived from the His23 nucleophile and catalytic Arg124. Atoms derived from residues that provide close packing contacts (Trp10, Trp88 & Ser129) are shown with additional dot surfaces (blue) whilst substrate derived heavy atoms are shown with semi-transparent CPK spheres (magenta). Hydrogen bonds are shown as green dashed lines.

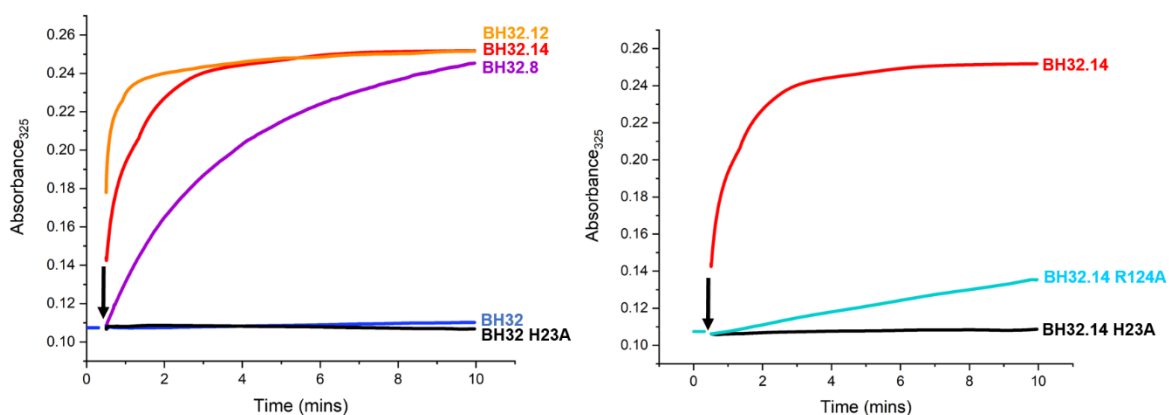

**Figure 11: Time course for the inhibition of BH32 and variants.** Formation of the covalently modified protein was monitored spectrophotometrically at 325 nm. **A)** Comparison of BH32, BH32 H23A, BH32.8, BH32.12 and BH32.14; **B)** Comparison of BH32.14, BH32.14 R124A and BH32.14 H23A. Reactions were performed using enzyme (10  $\mu$ M) and inhibitor **4** (25  $\mu$ M) in PBS pH 7.4 with 3% (v/v) acetonitrile at room temperature.

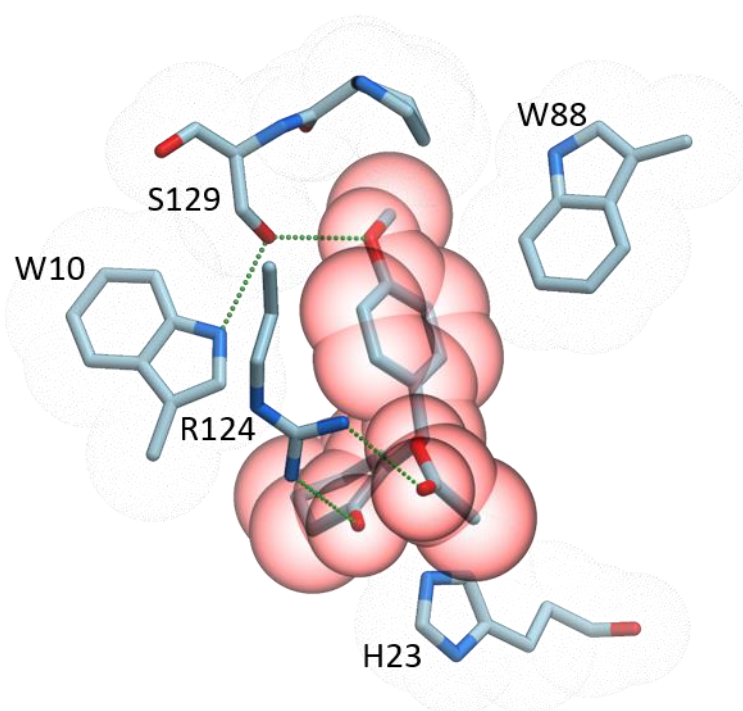

**Figure 12: DFT state showing inhibitor 4 bound in the active site of an engineered MBHase.** The DFT model is shown in all atom coloured stick representation. For clarity, only a subset of atoms that form close packing interactions with the inhibitor are shown along with atoms derived from the His23 nucleophile and catalytic Arg124. Atoms derived from residues that provide close packing contacts (Trp10, Trp88 & Ser129) are shown with additional dot surfaces (blue) whilst inhibitor derived heavy atoms are shown with semi-transparent CPK spheres (red). Hydrogen bonds are shown as green dashed lines.

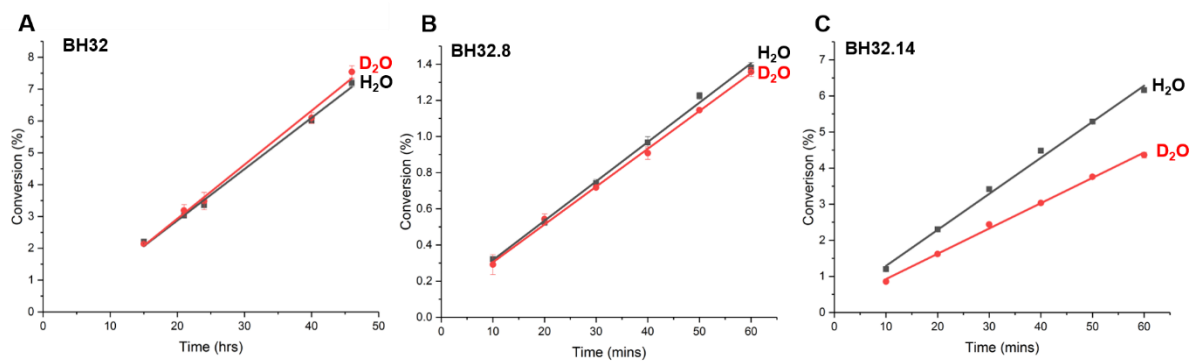

**Figure 13: Solvent kinetic isotope effects.** Biotransformations were performed using **1** (25 mM), **2** (2 mM) and the relevant biocatalyst (50  $\mu$ M BH32, 30  $\mu$ M BH32.8, 10  $\mu$ M BH32.14) in PBS (pH/pD 7.4) with 3% acetonitrile as a cosolvent. Linear fits of reaction conversion vs time are shown in black (H<sub>2</sub>O) and red (D<sub>2</sub>O). Error bars represent the standard deviation of measurements made in triplicate.

## 2. Supplementary Tables 1-9

**Table 1: Experimental and calculated masses of apo and inhibited enzymes.** Mass spectrometry data for BH32 and variants. Enzymes were inhibited with mechanistic inhibitor **4**.

| Variant                                        | Expected Mass                   | Observed Mass |
|------------------------------------------------|---------------------------------|---------------|
| BH32                                           | 27788                           | 27788         |
| BH32 inhibited<br>(60 minutes incubation)      | 28003 (80% single modification) | 28002         |
| BH32 H23A                                      | 27721                           | 27722         |
| BH32 H23A inhibited<br>(60 minutes incubation) | 27721 (no modification)         | 27722         |
| BH32.14                                        | 27806                           | 27806         |
| BH32.14 H23A                                   | 27740                           | 27739         |
| BH32.14 W10A                                   | 27691                           | 27690         |
| BH32.14 R124A                                  | 27721                           | 27720         |

**Table 2: Conversion and enantiomeric excess achieved by selected variants along the evolutionary trajectory.** Biotransformations were performed using **1** (3 mM), **2** (0.6 mM) and enzyme (18  $\mu$ M) in PBS (pH 7.4) with 3% MeCN as a cosolvent. To ensure that errors don't arise from determining low conversions achieved by BH32 after 4.5 hours, reactions were monitored over longer timeframes and were shown to be linear throughout this period. All variants preferentially produced the (*R*)-enantiomer. The error bars represent the standard deviation of measurements made in triplicate.

| Variant | Time (hours) | Conversion (%)   | Relative Conversion | <i>ee</i>    |
|---------|--------------|------------------|---------------------|--------------|
| BH32    | 4.5          | 0.08 $\pm$ 0.01  | 0.14 $\pm$ 0.01     | -            |
| BH32    | 22           | 0.39 $\pm$ 0.01  | 0.68 $\pm$ 0.02     | 20 $\pm$ 0.9 |
| BH32    | 31           | 0.54 $\pm$ 0.02  | 0.94 $\pm$ 0.03     | -            |
| BH32.4  | 4.5          | 0.22 $\pm$ 0.01  | 0.38 $\pm$ 0.02     | 23 $\pm$ 0.6 |
| BH32.6  | 4.5          | 0.71 $\pm$ 0.02  | 1.23 $\pm$ 0.03     | 9 $\pm$ 0.7  |
| BH32.8  | 4.5          | 1.56 $\pm$ 0.04  | 2.71 $\pm$ 0.07     | 33 $\pm$ 0.5 |
| BH32.9  | 4.5          | 3.40 $\pm$ 0.07  | 5.92 $\pm$ 0.12     | 67 $\pm$ 0.4 |
| BH32.11 | 4.5          | 9.74 $\pm$ 0.11  | 16.94 $\pm$ 0.20    | 82 $\pm$ 0.6 |
| BH32.12 | 4.5          | 20.30 $\pm$ 0.21 | 35.33 $\pm$ 0.36    | 86 $\pm$ 0.8 |
| BH32.14 | 4.5          | 57.54 $\pm$ 0.85 | 100 $\pm$ 1.48      | 93 $\pm$ 0.9 |

**Table 3: Kinetic characterization of BH32, BH32.8, BH32.12 and BH32.14.** Kinetic constants derived from global fitting of the combined  $V_0$  vs [1] and  $V_0$  vs [2] steady state kinetic data (Figure S2) using ordered and/or random order binding models. Fitting did not allow reliable determination of  $K_{SA}$  and it was not possible to determine the order of binding. The contribution of  $K_{SA}$  on the apparent  $k_{cat}$  and  $K_m$  values in the ordered binding equation (Eq. 2) was examined by varying  $K_{SA}K_{mB}$  over a range of  $0.1 \times K_{mA}K_{mB}$  to  $10 \times K_{mA}K_{mB}$ . The goodness of fit was not significantly different using ordered or random order binding equations across this range of values. While the apparent  $K_m$  are sensitive to the value of  $K_{SA}$ , the  $k_{cat}$  values vary by only ~25% for BH32 and 7% for BH32.14

#### BH32

| Model   | $k_{cat}$ (hr <sup>-1</sup> ) | $K_{mA}$ (μM) | $K_{mB}$ (μM) | $K_{SA}K_{mB}$         |
|---------|-------------------------------|---------------|---------------|------------------------|
| Random  | 0.134 ± 0.012                 | 7998 ± 987    | 1767 ± 249    | -                      |
| Ordered | 0.170 ± 0.023                 | 16744 ± 3057  | 2766 ± 517    | 0.1 × $K_{mA}K_{mB}$   |
| Ordered | 0.134 ± 0.012                 | 7998 ± 987    | 1767 ± 249    | $K_{mA} \times K_{mB}$ |
| Ordered | 0.110 ± 0.008                 | 1929 ± 293    | 1074 ± 178    | 10 × $K_{mA}K_{mB}$    |

#### BH32.8

| Model  | $k_{cat}$ (min <sup>-1</sup> ) | $K_{mA}$ (μM) | $K_{mB}$ (μM) | $K_{SA}K_{mB}$ |
|--------|--------------------------------|---------------|---------------|----------------|
| Random | 0.0168 ± 0.001                 | 4173 ± 254    | 2381 ± 224    | -              |

#### BH32.12

| Model  | $k_{cat}$ (min <sup>-1</sup> ) | $K_{mA}$ (μM) | $K_{mB}$ (μM) | $K_{SA}K_{mB}$ |
|--------|--------------------------------|---------------|---------------|----------------|
| Random | 0.100 ± 0.004                  | 9719 ± 640    | 893 ± 53      | -              |

#### BH32.14

| Model   | $k_{cat}$ (min <sup>-1</sup> ) | $K_{mA}$ (μM) | $K_{mB}$ (μM) | $K_{SA}K_{mB}$         |
|---------|--------------------------------|---------------|---------------|------------------------|
| Random  | 0.349 ± 0.034                  | 2556 ± 444    | 1137 ± 226    | -                      |
| Ordered | 0.368 ± 0.041                  | 4134 ± 851    | 1304 ± 280    | 0.1 × $K_{mA}K_{mB}$   |
| Ordered | 0.349 ± 0.034                  | 2556 ± 444    | 1137 ± 226    | $K_{mA} \times K_{mB}$ |
| Ordered | 0.325 ± 0.029                  | 697 ± 128     | 914 ± 193     | 10 × $K_{mA}K_{mB}$    |

A = 2-cyclohexen-1-one, B = 4-nitrobenzaldehyde

**Table 4: Effect of cosolvent on BH32.14 activity.** MBH reactions were performed using **1** (50mM), **2** (10mM) and BH32.14 (0.5 mol%) in PBS buffer (pH 7.4) with the stated concentration of MeCN or DMSO as a cosolvent. The percentage conversion was determined after 5 hours by HPLC analysis.

| Cosolvent | Conversion (%) |
|-----------|----------------|
| 20 % MeCN | 2              |
| 30 % MeCN | 0.3            |
| 40 % MeCN | 0              |
| 20 % DMSO | 50             |
| 30 % DMSO | 43             |
| 40 % SMSO | 16             |

**Table 5: Reaction conditions for the synthesis of 3 & 5a-w.** All reactions were performed using PBS buffer pH 7.4 and 20% DMSO

| Product                  | Enone Conc. (mM) <sup>[1]</sup> | Enzyme  | Catalyst loading (mol%) | Reaction time (h) | Mean % Conv. ( $\pm$ s.d.) | Wavelength (nm) | extinction coefficient (mM <sup>-1</sup> cm <sup>-1</sup> ) |                                 |
|--------------------------|---------------------------------|---------|-------------------------|-------------------|----------------------------|-----------------|-------------------------------------------------------------|---------------------------------|
|                          |                                 |         |                         |                   |                            |                 | aldehyde                                                    | product                         |
| <b>3</b>                 | 50                              | BH32.14 | 0.5                     | 18                | 94 $\pm$ 0.2               | 280             | 600                                                         | 600                             |
| <b>5a</b>                | 50                              | BH32.14 | 1.5                     | 18                | 97 $\pm$ 0.2               | 220             | 240                                                         | 700                             |
| <b>5b</b>                | 50                              | BH32.14 | 2.5                     | 48                | 82 $\pm$ 0.3               | 220             | 240                                                         | 480                             |
| <b>5c</b>                | 50                              | BH32.14 | 2.5                     | 1.5               | 97 $\pm$ 0.1               | 220             | 240                                                         | 400                             |
| <b>5d</b>                | 50                              | BH32.14 | 5                       | 48                | 70 $\pm$ 0.5               | 220             | 240                                                         | 589                             |
| <b>5e</b>                | 100                             | BH32.14 | 2.5                     | 18                | 67 $\pm$ 0.3               | 220             | 130                                                         | 740                             |
| <b>5f</b>                | 50                              | BH32.14 | 2.5                     | 48                | 56 $\pm$ 0.9               | 220             | 105                                                         | 800                             |
| <b>5g</b>                | 50                              | BH32.14 | 1.5                     | 18                | 92 $\pm$ 0.2               | 254             | 1000                                                        | 310                             |
| <b>5h</b>                | 50                              | BH32.14 | 5                       | 48                | 33 $\pm$ 0.4               | 254             | 65                                                          | 190                             |
| <b>5i</b>                | 50                              | BH32.14 | 5                       | 48                | 58 $\pm$ 0.4               | 220             | 213                                                         | 629                             |
| <b>5j</b>                | 50                              | BH32.14 | 5                       | 48                | 1.2 $\pm$ 0.003            | 220             | 583                                                         | 639                             |
| <b>5k</b>                | 50                              | BH32.14 | 1.5                     | 18                | 92 $\pm$ 1.0               | 220             | 140                                                         | 660                             |
| <b>5l</b>                | 50                              | BH32.14 | 1.5                     | 18                | 99 $\pm$ 0.2               | 220             | 55                                                          | 670                             |
| <b>5m</b>                | 50                              | BH32.14 | 1.5                     | 48                | 71 $\pm$ 1.2               | 220             | 75                                                          | 710                             |
| <b>5n</b>                | 50                              | BH32.14 | 5                       | 18                | 90 $\pm$ 0.2               | 220             | 80                                                          | 610                             |
| <b>5o</b> <sup>[2]</sup> | 50                              | BH32.8  | 1.5                     | 0.5               | 98 $\pm$ 0.1               | 220             | 390                                                         | 80                              |
| <b>5p</b>                | 50                              | BH32.8  | 5                       | 48                | 91 $\pm$ 0.07              | 220             | 1000                                                        | 760                             |
| <b>5q</b>                | 50                              | BH32.8  | 5                       | 48                | 81 $\pm$ 0.2               | 220             | 900                                                         | 590                             |
| <b>5r</b>                | 50                              | BH32.8  | 5                       | 48                | 76 $\pm$ 0.5               | 220             | 490                                                         | 620                             |
| <b>5s</b>                | 50                              | BH32.14 | 1.5                     | 18                | 97 $\pm$ 0.3               | 220             | 130                                                         | 435                             |
| <b>5t</b>                | 50                              | BH32.14 | 1.5                     | 18                | 92 $\pm$ 0.3               | 254             | 60                                                          | 360                             |
| <b>5u</b>                | 50                              | BH32.14 | 2.5                     | 48                | 99 $\pm$ 0.3               | 220             | 240                                                         | 345                             |
| <b>5v+5w</b>             | 50                              | BH32.14 | 5                       | 24                | 89 $\pm$ 0.1               | 220             | 300                                                         | <b>5v</b> 1000<br><b>5w</b> 250 |

<sup>[1]</sup> 10 mM acceptor was used in each reaction

<sup>[2]</sup> Reaction was performed in PBS pH 7.0



**Table 6: SFC analytical methods for MBH adducts 5a-w**

|                         | Column                                                         | Flow<br>(mL.min <sup>-1</sup> ) | Mobile Phase<br>(% MeOH<br>in CO <sub>2</sub> ) | Run Time<br>(min) |
|-------------------------|----------------------------------------------------------------|---------------------------------|-------------------------------------------------|-------------------|
| <b>5a</b>               | Daicel 80S82 CHIRALPAK <sup>®</sup><br>IG-3, 3 mm, 50 mm       | 1                               | 5-10% (3min)<br>10% (7min)                      | 10                |
| <b>5b</b>               | Daicel 80S82 CHIRALPAK <sup>®</sup><br>IA-3, 3 mm, 50 mm       | 1                               | 25%                                             | 2                 |
| <b>5c</b>               | Daicel 80S82 CHIRALPAK <sup>®</sup><br>IG-3, 3 mm, 50 mm, 3 μm | 2                               | 20%                                             | 2                 |
| <b>5d</b>               | Daicel 80S82 CHIRALPAK <sup>®</sup><br>IA-3, 3 mm, 50 mm       | 1                               | 10%                                             | 2                 |
| <b>5e</b>               | Daicel 80S82 CHIRALPAK <sup>®</sup><br>IA-3, 3 mm, 50 mm, 3 μm | 1                               | 35%                                             | 1                 |
| <b>5f</b>               | Daicel 80S82 CHIRALPAK <sup>®</sup><br>IC-3, 3 mm, 50 mm, 3 μm | 1                               | 5%                                              | 5                 |
| <b>5g</b>               | Daicel 80S82 CHIRALPAK <sup>®</sup><br>IG-3, 3 mm, 50 mm, 3 μm | 1                               | 20%                                             | 3                 |
| <b>5h</b>               | Daicel 80S82 CHIRALPAK <sup>®</sup><br>IG-3, 3 mm, 50 mm, 3 μm | 1                               | 5%                                              | 4                 |
| <b>5i</b>               | Daicel 80S82 CHIRALPAK <sup>®</sup><br>IC-3, 3 mm, 50 mm, 3 μm | 1                               | 10%                                             | 3                 |
| <b>5j</b>               | Daicel 80S82 CHIRALPAK <sup>®</sup><br>IC-3, 3 mm, 50 mm, 3 μm | 1                               | 10                                              | 3.4               |
| <b>5k</b>               | Daicel 80S82 CHIRALPAK <sup>®</sup><br>IA-3, 3 mm, 50 mm, 3 μm | 1.2                             | 3%                                              | 7                 |
| <b>5l</b>               | Daicel 80S82 CHIRALPAK <sup>®</sup><br>IG-3, 3 mm, 50 mm, 3 μm | 1                               | 20%                                             | 2.2               |
| <b>5m</b>               | Daicel 80S82 CHIRALPAK <sup>®</sup><br>IA-3, 3 mm, 50 mm, 3 μm | 1.2                             | 3%                                              | 6                 |
| <b>5n</b>               | Daicel 80S82 CHIRALPAK <sup>®</sup><br>IG-3, 3 mm, 50 mm, 3 μm | 1                               | 20%                                             | 2.2               |
| <b>5o</b>               | Daicel 80S82 CHIRALPAK <sup>®</sup><br>IA-3, 3 mm, 50 mm, 3 μm | 1                               | 10%                                             | 5                 |
| <b>5p</b>               | Daicel 80S82 CHIRALPAK <sup>®</sup><br>IC-3, 3 mm, 50 mm, 3 μm | 1                               | 10%                                             | 5                 |
| <b>5q</b>               | Daicel 80S82 CHIRALPAK <sup>®</sup><br>IC-3, 3 mm, 50 mm, 3 μm | 1                               | 20%                                             | 2                 |
| <b>5r</b>               | Daicel 80S82 CHIRALPAK <sup>®</sup><br>IC-3, 3 mm, 50 mm, 3 μm | 1                               | 15%                                             | 2                 |
| <b>5s</b>               | Daicel 80S82 CHIRALPAK <sup>®</sup><br>IC-3, 3 mm, 50 mm, 3 μm | 2.5                             | 3%                                              | 10                |
| <b>5t</b>               | Daicel 80S82 CHIRALPAK <sup>®</sup><br>IG-3, 3 mm, 50 mm, 3 μm | 1.2                             | 20%                                             | 5                 |
| <b>5u</b>               | Daicel 80S82 CHIRALPAK <sup>®</sup><br>IA-3, 3 mm, 50 mm, 3 μm | 1.5                             | 5%                                              | 5                 |
| <b>5v+</b><br><b>5w</b> | Daicel 80S82 CHIRALPAK <sup>®</sup><br>IC-3, 3 mm, 50 mm, 3 μm | 2                               | 5%                                              | 8                 |

**Table 7: Data collection and refinement statistics.** Entries in parentheses refer to the statistics in the highest resolution bin.

|                                | <b>BH32.6</b>                      | <b>BH32.7</b>                    | <b>BH32.12</b>                       |
|--------------------------------|------------------------------------|----------------------------------|--------------------------------------|
| Wavelength                     | 0.976                              | 0.9763                           | 0.9795                               |
| Resolution range               | 55.26 - 1.48 (1.533 - 1.48)        | 37.87 - 1.8 (1.864 - 1.8)        | 42.71 - 2.29 (2.372 - 2.29)          |
| Space group                    | P 31 2 1                           | P 1 21 1                         | P 31 2 1                             |
| Unit cell                      | 71.689 71.689<br>121.272 90 90 120 | 36.56 69.63 45.72<br>90 99.29 90 | 70.9666 70.9666<br>118.768 90 90 120 |
| Total reflections              | 578916 (56870)                     | 64699 (6531)                     | 158031 (15120)                       |
| Unique reflections             | 60772 (5941)                       | 20789 (2043)                     | 16121 (1571)                         |
| Multiplicity                   | 9.5 (9.6)                          | 3.1 (3.2)                        | 9.8 (9.6)                            |
| Completeness (%)               | 99.90 (99.13)                      | 99.00 (98.55)                    | 99.55 (98.66)                        |
| Mean I/sigma(I)                | 14.64 (1.19)                       | 17.67 (4.27)                     | 10.51 (1.21)                         |
| Wilson B-factor                | 26.4                               | 34.48                            | 65.35                                |
| R-merge                        | 0.05985 (1.411)                    | 0.03661 (0.2531)                 | 0.0806 (1.617)                       |
| R-meas                         | 0.0634 (1.491)                     | 0.0443 (0.3045)                  | 0.08509 (1.708)                      |
| R-pim                          | 0.02062 (0.4776)                   | 0.02464 (0.1674)                 | 0.02701 (0.5474)                     |
| CC1/2                          | 0.997 (0.679)                      | 0.998 (0.919)                    | 0.999 (0.603)                        |
| CC*                            | 0.999 (0.899)                      | 0.999 (0.979)                    | 1 (0.867)                            |
| Reflections used in refinement | 60762 (5939)                       | 20802 (2043)                     | 16120 (1551)                         |
| Reflections used for R-free    | 3039 (305)                         | 1067 (117)                       | 824 (95)                             |
| R-work                         | 0.1572 (0.2272)                    | 0.2039 (0.3121)                  | 0.2226 (0.3236)                      |
| R-free                         | 0.1771 (0.2647)                    | 0.2546 (0.3733)                  | 0.2616 (0.4293)                      |
| CC(work)                       | 0.964 (0.872)                      | 0.955 (0.823)                    | 0.946 (0.681)                        |
| CC(free)                       | 0.966 (0.831)                      | 0.937 (0.760)                    | 0.925 (0.403)                        |
| Number of non-hydrogen atoms   | 2210                               | 1977                             | 1890                                 |
| macromolecules                 | 1950                               | 1829                             | 1838                                 |
| ligands                        | 18                                 | 0                                | 9                                    |
| solvent                        | 242                                | 148                              | 43                                   |
| Protein residues               | 448                                | 227                              | 226                                  |
| RMS(bonds)                     | 0.009                              | 0.004                            | 0.006                                |
| RMS(angles)                    | 1.12                               | 0.54                             | 1.08                                 |
| Ramachandran favored (%)       | 98.69                              | 99.10                            | 97.75                                |
| Ramachandran allowed (%)       | 1.31                               | 0.90                             | 1.35                                 |
| Ramachandran outliers (%)      | 0                                  | 0                                | 0.9                                  |
| Rotamer outliers (%)           | 1.43                               | 2.05                             | 2.02                                 |
| Clash score                    | 2.76                               | 3.52                             | 8.59                                 |
| Average B-factor               | 35.89                              | 44.94                            | 75.73                                |
| macromolecules                 | 34.02                              | 44.77                            | 75.73                                |
| ligands                        | 60.92                              |                                  | 80.84                                |
| solvent                        | 49.14                              | 47.07                            | 74.73                                |
| Number of TLS groups           | 0                                  | 1                                | 1                                    |

**Table 8: Mother liquor composition used for protein crystallization of BH32.6, BH32.7 and BH32.12**

| Variant | Crystallization conditions (200+200nl drops incubated at 4°C)                                                                                                                                                                                                                                                    |
|---------|------------------------------------------------------------------------------------------------------------------------------------------------------------------------------------------------------------------------------------------------------------------------------------------------------------------|
| BH32.6  | 0.06 M Divalents [0.3M Magnesium chloride hexahydrate; 0.3M calcium chloride dihydrate]<br>0.1 M BS1 pH 6.5 [Imidazole; MES monohydrate (acid)]<br>30% Precipitant mix 2 [40% v/v Ethylene glycol; 20% w/v PEG 8K]<br>Morpheus screen condition A2 (Molecular Dimensions)                                        |
| BH32.7  | 0.12 M Monosaccharides [0.2M D-Glucose; 0.2M D-Mannose; 0.2M D-Galactose; 0.2M L-Fucose; 0.2M D-Xylose; 0.2M N-Acetyl-D-Glucosamine]<br>0.1 M BS2 pH 7.5 [Sodium HEPES; MOPS (acid)]<br>30 % Precipitant mix 1 [40% v/v PEG 500* MME; 20 % w/v PEG 20000]<br>Morpheus screen condition F5 (Molecular Dimensions) |
| BH32.12 | 0.1M SPG pH 9.0, 25% w/v PEG 1500<br>PACT premier Eco condition A6 (Molecular Dimensions)                                                                                                                                                                                                                        |

**Table 9: Primer sequences used to generate DNA libraries**

| Flanking Primers |                                               |
|------------------|-----------------------------------------------|
| XHO_R            | ATGCATGCctcgagagagccct                        |
| NDE_F            | CATGCATGcatatgattcgtgcgta                     |
| Round 2          |                                               |
| Y45x_T49x_F_1    | ACCCTGCTGGACGAANDTGAGAACTGNDTCGCGAAGCGTTCTCT  |
| Y45x_T49x_F_2    | ACCCTGCTGGACGAAVHGGAGAACTGVHGC GCGAAGCGTTCTCT |
| Y45x_T49x_F_3    | ACCCTGCTGGACGAANDTGAGAACTGVHGC GCGAAGCGTTCTCT |
| Y45x_T49x_F_4    | ACCCTGCTGGACGAAVHGGAGAACTGNDTCGCGAAGCGTTCTCT  |
| Y45x_T49x_F_5    | ACCCTGCTGGACGAANDTGAGAACTGTGGCGCGAAGCGTTCTCT  |
| Y45x_T49x_F_6    | ACCCTGCTGGACGAATGGGAGAACTGNDTCGCGAAGCGTTCTCT  |
| Y45x_T49x_F_7    | ACCCTGCTGGACGAAVHGGAGAACTGTGGCGCGAAGCGTTCTCT  |
| Y45x_T49x_F_8    | ACCCTGCTGGACGAATGGGAGAACTGVHGC GCGAAGCGTTCTCT |
| Y45x_T49x_F_9    | ACCCTGCTGGACGAATGGGAGAACTGTGGCGCGAAGCGTTCTCT  |
| Y45x_T49x_R      | TTC GTCCAGCAGGGT                              |
| F87x_W88x_F_1    | AAATACCCTGAAAACNDTNDTGAAATCTCCCTGCGT          |
| F87x_W88x_F_2    | AAATACCCTGAAAACVHGVHGGAAATCTCCCTGCGT          |
| F87x_W88x_F_3    | AAATACCCTGAAAACNDTVHGGAAATCTCCCTGCGT          |
| F87x_W88x_F_4    | AAATACCCTGAAAACVHGNDTGAAATCTCCCTGCGT          |
| F87x_W88x_F_5    | AAATACCCTGAAAACNDTTGGGAAATCTCCCTGCGT          |
| F87x_W88x_F_6    | AAATACCCTGAAAACVHGNDTGAAATCTCCCTGCGT          |
| F87x_W88x_F_7    | AAATACCCTGAAAACVHGTGGGAAATCTCCCTGCGT          |
| F87x_W88x_F_8    | AAATACCCTGAAAACVHGVHGGAAATCTCCCTGCGT          |
| F87x_W88x_F_9    | AAATACCCTGAAAACVHGTGGGAAATCTCCCTGCGT          |
| F87x_W88x_R      | GTTTTCAGGGTATTTGAAACC                         |
| T49x_F           | GAATACGAGAACTGNNKCGCGAAGCGTTCTCT              |
| T49x_R           | CAGTTTCTCGTATTTCGTC                           |
| R50x_F           | GAATACGAGAACTGACCNKGAAGCGTTCTCTAAC            |
| R50x_R           | GGTCAGTTTCTCGTATTTC                           |
| Round 4          |                                               |
| N14x_F           | TTGATAGCCTGGGTA CTCTGNNKAGCGTTGAAGGCG         |

|                |                                                  |
|----------------|--------------------------------------------------|
| N14x_R         | CAGAGTACCCAGGCT                                  |
| M130x_F        | GATACCGAGCAGGCC <b>NNK</b> GCAATTCCTGGACGCA      |
| M130x_R        | GGCCTGCTCGGTATC                                  |
| E174x_F        | GGCGTTAAAGGCGAG <b>NNK</b> GCAAGTGTACGTTGGT      |
| E174x_R        | CTCGCCTTTAACGCC                                  |
| <b>Round 5</b> |                                                  |
| L10x_F         | GCGGTATTCTTTGATAGC <b>NNK</b> GGTACTCTGATTAGC    |
| A19x_F         | CTGATTAGCGTTGAAGGC <b>NNK</b> GCTAAATCCCATCTG    |
| P38x_F         | GGTGACTATCCGCTGAAC <b>NNK</b> AAAACCCTGCTGGAC    |
| L42x_F         | AACCCGAAAACCCTG <b>NNK</b> GACGAATACGAGAAA       |
| Y45x_F         | ACCCTGCTGGACGA <b>NNK</b> GAGAACTGGCTCGC         |
| E46x_F         | ACCCTGCTGGACGAATAC <b>NNK</b> AAACTGGCTCGCGAA    |
| P60x_F         | AACTATGCGGGCAA <b>NNK</b> TATCGTCCGCTGCGT        |
| P63x_F         | GGCAAACCGTATCGT <b>NNK</b> CTGCGTGATATCCTG       |
| F81x_F         | GCGGAAAAGTACGGT <b>NNK</b> AAATACCCTGAAAAC       |
| S91x_F         | CCTGAAAACCTGTGGGAAATC <b>NNK</b> CTGCGTATGTCTCAA |
| Q96x_F         | TCCCTGCGTATGTCT <b>NNK</b> CGCTACGGCGAGCTG       |
| S124x_F        | GGCATGATCACCGAT <b>NNK</b> GATACCGAGCAGGCC       |
| D125x_F        | GGCATGATCACCGATTCT <b>NNK</b> ACCGAGCAGGCCACG    |
| Q128x_F        | ACCGATTCTGATACCGAG <b>NNK</b> GCCACGGCATTCTG     |
| M130x_F        | GATACCGAGCAGGCC <b>NNK</b> GCAATTCCTGGACGCA      |
| L133x_F        | CAGGCCACGGCATT <b>NNK</b> GACGCACTGGGCATC        |
| F154x_F        | TCTGAAGAAGCTGGTTTC <b>NNK</b> AAACCGCACCCACGC    |
| K167x_F        | TTCGAACTGGCTCTGAAG <b>NNK</b> GCCGGCGTTAAAGGC    |
| E174x_F        | GGCGTTAAAGGCGAG <b>NNK</b> GCAAGTGTACGTTGGT      |
| K202x_F        | ATCCTGCTGGATCGT <b>NNK</b> GGTGAGAAACGTGAA       |
| L10x_R         | GCTATCAAAGAATACCGC                               |
| A19x_R         | GCCTTCAACGCTAAT                                  |
| P38x_R         | CGGGTTCAGCGGATA                                  |
| L42x_R         | CAGGGTTTTCGGGTT                                  |
| Y45x_R         | TTCGTCCAGCAGGGT                                  |
| E46x_R         | GTATTCGTCCAGCAG                                  |
| P60x_R         | TTTGCCCGCATAGTT                                  |
| P63x_R         | ACGATACGGTTTGCC                                  |
| F81x_R         | ACCGTACTTTTCCGC                                  |
| S91x_R         | GATTTCCACAAGTTTTC                                |
| Q96x_R         | AGACATACGCAGGGA                                  |
| S124x_R        | ATCGGTGATCATGCC                                  |
| D125x_R        | AGAATCGGTGATCATGCC                               |
| Q128x_R        | CTCGGTATCAGAATCGGT                               |
| M130x_R        | GGCCTGCTCGGTATC                                  |
| L133x_R        | GAATGCCGTGGCCTG                                  |
| F154x_R        | GAAACCAGCTTCTTCAGA                               |
| K167x_R        | CTTCAGAGCCAGTTC                                  |

|                |                                                 |
|----------------|-------------------------------------------------|
| E174x_R        | CTCGCCTTTAACGCC                                 |
| K202x_R        | ACGATCCAGCAGGAT                                 |
| <b>Round 6</b> |                                                 |
| V16x_F         | GGTACTCTGATTAGC <b>NNK</b> GAAGGCGCTGCTAAA      |
| E17x_F         | ACTCTGATTAGCGTT <b>NNK</b> GGCGCTGCTAAATCC      |
| G32x_F         | ATGGAGGAAGTGCTG <b>NNK</b> GACTATCCGCTGAACC     |
| Y34x_F         | GAAGTGCTGGGTGAC <b>NNK</b> CCGCTGAACCCGAAA      |
| L36x_F         | CTGGGTGACTATCCG <b>NNK</b> AACCCGAAAACCCTG      |
| Y61x_F         | TATGCGGGCAAACCG <b>NNK</b> CGTCCGCTGCGTGAT      |
| L64x_F         | AAACCGTATCGTCCG <b>NNK</b> CGTGATATCCTGGAAGAA   |
| L68x_F         | CCGCTGCGTGATATC <b>NNK</b> GAAGAAGTAATGCGTAAACT |
| M120x_F        | AAATATCACGTTGGC <b>NNK</b> KATCACCGATAGGGATACC  |
| T122x_F        | CACGTTGGCATGATC <b>NNK</b> GATAGGGATACCGAGC     |
| D123x_F        | GTTGGCATGATCAC <b>NNK</b> KAGGGATACCGAGCCG      |
| D125x_F        | ATGATCACCGATAG <b>NNK</b> KACCGAGCCGGCC         |
| T126x_F        | ATCACCGATAGGGAT <b>NNK</b> GAGCCGGCCACG         |
| Q128x_F        | GATAGGGATACCGAG <b>NNK</b> GCCACGGCATTCTG       |
| E149x_F        | TCCATCACACGTCT <b>NNK</b> GAAGCTGGTTTCTTTAAACC  |
| G152x_F        | ACGTCTGAAGAAGCT <b>NNK</b> TTCTTTAAACCGCACCCA   |
| L199x_F        | ATGACTAGCATCCTG <b>NNK</b> GATCGTAAAGGTGAGAAAC  |
| E204x_F        | CTGGATCGTAAAGGT <b>NNK</b> AAACGTGAATTCTGGGAT   |
| K205x_F        | GATCGTAAAGGTGAG <b>NNK</b> CGTGAATTCTGGGATAAG   |
| E207x_F        | AAAGGTGAGAAACGT <b>NNK</b> TTCTGGGATAAGGCCG     |
| V16x_R         | GCTAATCAGAGTACCCAG                              |
| E17x_R         | AACGCTAATCAGAGTACC                              |
| G32x_R         | CAGCACTTCCTCCAT                                 |
| Y34x_R         | GTCACCCAGCACTTC                                 |
| L36x_R         | CGGATAGTCACCCAG                                 |
| Y61x_R         | CGGTTTGCCCGCATA                                 |
| L64x_R         | CGGACGATACGGTTT                                 |
| L68x_R         | GATATCACGCAGCGG                                 |
| M120x_R        | GCCAACGTGATATTTACC                              |
| T122x_R        | GATCATGCCAACGTG                                 |
| D123x_R        | GGTGATCATGCCAAC                                 |
| D125x_R        | CCTATCGGTGATCATGCC                              |
| T126x_R        | ATCCCTATCGGTGATCAT                              |
| Q128x_R        | CTCGGTATCCCTATCG                                |
| E149x_R        | AGACGTGGTGATGGA                                 |
| G152x_R        | AGCTTCTTCAGACGT                                 |
| D199x_R        | CAGGATGCTAGTCATACC                              |
| E204x_R        | ACCTTTACGATCCAGCAG                              |
| K205x_R        | CTCACCTTTACGATCCAG                              |
| E207x_R        | ACGTTTCTCACCTTTACG                              |
| <b>Round 7</b> |                                                 |

|                |                                                           |
|----------------|-----------------------------------------------------------|
| S95x_F1        | ATCTCCCTGCGTATG <b>NDT</b> CAACGCTACGGCGAG                |
| S95x_F2        | ATCTCCCTGCGTATG <b>VHG</b> CAACGCTACGGCGAG                |
| S95x_F3        | ATCTCCCTGCGTATG <b>TGG</b> CAACGCTACGGCGAG                |
| S95x_R         | Catacgcaggagat                                            |
| S22x_F1        | GAAGGCGCTGCTAA <b>NDT</b> CATCTGAAAATTATGGAGGA            |
| S22x_F2        | GAAGGCGCTGCTAA <b>VHG</b> CATCTGAAAATTATGGAGGA            |
| S22x_F3        | GAAGGCGCTGCTAA <b>TGG</b> CATCTGAAAATTATGGAGGA            |
| S22x_R         | Tttagcagccttc                                             |
| M120x_T122x_F1 | AAATATCACGTTGGC <b>NDT</b> ATC <b>NDT</b> AATAGGGATACCGAG |
| M120x_T122x_F2 | AAATATCACGTTGGC <b>VHG</b> ATC <b>VHG</b> AATAGGGATACCGAG |
| M120x_T122x_F3 | AAATATCACGTTGGC <b>NDT</b> ATC <b>VHG</b> AATAGGGATACCGAG |
| M120x_T122x_F4 | AAATATCACGTTGGC <b>VHG</b> ATC <b>NDT</b> AATAGGGATACCGAG |
| M120x_T122x_F5 | AAATATCACGTTGGC <b>NDT</b> ATC <b>TGG</b> AATAGGGATACCGAG |
| M120x_T122x_F6 | AAATATCACGTTGGC <b>TGG</b> ATC <b>NDT</b> AATAGGGATACCGAG |
| M120x_T122x_F7 | AAATATCACGTTGGC <b>VHG</b> ATC <b>TGG</b> AATAGGGATACCGAG |
| M120x_T122x_F8 | AAATATCACGTTGGC <b>TGG</b> ATC <b>VHG</b> AATAGGGATACCGAG |
| M120x_T122x_F9 | AAATATCACGTTGGC <b>TGG</b> ATC <b>TGG</b> AATAGGGATACCGAG |
| M120x_T122x_R  | GCCAACGTGATATTTAC                                         |
| <b>Round 8</b> |                                                           |
| L10_F          | GTATTCTTTGATAGC <b>NNK</b> GGTACTCTGATTAGCGTT             |
| A20_F          | AGCGTTGAAGGCGCT <b>NNK</b> AAAGTGCATCTGAAAATTATG          |
| L24_F          | GCTGCTAAAGTGCAT <b>NNK</b> AAAATTATGGAGGAAGTGCT           |
| M27_F          | GTGCATCTGAAAATT <b>NNK</b> GAGGAAGTGCTGGGT                |
| L42_F          | AACCCGAAAACCTG <b>NNK</b> GACGAATACGAGAAACTG              |
| T45_F          | ACCCTGCTGGACGA <b>NNK</b> GAGAAACTGGCTCGC                 |
| P63_F          | GGCAAACCGTATCGT <b>NNK</b> CTGCGTGATATCCTG                |
| L64_F          | AAACCGTATCGTCCG <b>NNK</b> CGTGATATCCTGGAAGAA             |
| S91_F          | AACTTGTGGGAAATC <b>NNK</b> CTGCGTATGGCGCAA                |
| L92_F          | TTGTGGGAAATCTCC <b>NNK</b> CGTATGGCGCAACG                 |
| Q96_F          | TCCCTGCGTATGGCG <b>NNK</b> CGCTACGGCGAGC                  |
| D125_F         | GTGATCCTGAATAGG <b>NNK</b> KACCGAGCCGGC                   |
| E127_F         | CTGAATAGGGATACC <b>NNK</b> KCCGGCCACGGC                   |
| A129_F         | AGGGATACCGAGCCG <b>NNK</b> KACGGCATTCTGGAC                |
| I145_F         | GACCTGTTTCGATTCC <b>NNK</b> KACCAGTCTGAAGAA               |
| T147_F         | TTCGATTCCATCACC <b>NNK</b> TCTGAAGAAGCTGGT                |
| L10_R          | GCTATCAAAGAATACCGC                                        |
| A20_R          | AGCGCCTTCAACGCT                                           |
| L24_R          | ATGCACTTTAGCAGC                                           |
| M27_R          | AATTTTCAGATGCACTTTAG                                      |
| L42_R          | CAGGGTTTTTCGGGTT                                          |
| T45_R          | TTCGTCCAGCAGGGT                                           |
| P63_R          | ACGATACGGTTTGCC                                           |
| L64_R          | CGGACGATACGGTTT                                           |
| S91_R          | GATTTCCACAAGTTTTT                                         |

|                 |                                                    |
|-----------------|----------------------------------------------------|
| L92_R           | GGAGATTTCCACAA                                     |
| Q96_R           | CGCCATACGCAGGGA                                    |
| D125_R          | CCTATTCAGGATCACGC                                  |
| E127_R          | GGTATCCCTATTCAGGA                                  |
| A129_R          | CGGCTCGGTATCCCT                                    |
| I145_R          | GGAATCGAACAGGTC                                    |
| T147_R          | GGTGATGGAATCGAA                                    |
| <b>Round 9</b>  |                                                    |
| L10_F           | GTATTCTTTGATAGC <b>NNK</b> GGTACTCTGATTAGCGTT      |
| L24_F           | GCTTATAAAGTGCAT <b>NNK</b> AAAATTATGGAGGAAGTGCT    |
| L42_F           | AACCCGAAAACCTG <b>NNK</b> GACGAATACGAGAAACTG       |
| E46_F           | CTGCTGGACGAATAC <b>NNK</b> AAACTGGCTCGCGAA         |
| A129_F          | AGGGATACCGAGCCG <b>NNK</b> ACGGCATTCTGGAC          |
| L10_R           | GCTATCAAAGAATACCGC                                 |
| L24_R           | ATGCACTTTATAAGC                                    |
| L42_R           | CAGGGTTTTCGGGTT                                    |
| E46_R           | GTATTCGTCCAGCAGGGT                                 |
| A129_R          | CGGCTCGGTATCCCT                                    |
| <b>Round 11</b> |                                                    |
| F154_F          | TCTGAAGAAGCTGGTTTC <b>NNK</b> AAACCGCACCCACGC      |
| F154_R          | GAAACCAGCTTCTTCAGA                                 |
| <b>Round 12</b> |                                                    |
| Y20x_F          | AGCGTTGAAGGCGCT <b>NNK</b> AAAGTGCATTTTAAAATTATGGA |
| V30x_F          | AAAATTATGGAGGA <b>NNK</b> CTGGGTGACTATCCG          |
| K47x_F          | CTGGACGAATACGAG <b>NNK</b> CTGGCTCGCGAAGCG         |
| Y46x_F          | GAAGCGTTCTCTAAC <b>NNK</b> GCGGGCAAACCGTAT         |
| I67x_F          | CGTCCGCTGCGTGAT <b>NNK</b> CTGGAAGAAGTAATGCG       |
| E70x_F          | CGTGATATCCTGGA <b>NNK</b> GTAATGCGTAAACTGGC        |
| F87x_F          | AAATACCCTGAAAAC <b>NNK</b> TGGGAAATCTCCCTG         |
| S91x_F          | AACTTGTTGGGAAATC <b>NNK</b> CTGCGTATGGCGCAA        |
| R97x_F          | CTGCGTATGGCGCA <b>NNK</b> TACGGCGAGCTGTAC          |
| F153x_F         | TCTGAAGAAGCTGGT <b>NNK</b> TCTAAACCGCACCCA         |
| K155x_F         | GAAGCTGGTTTCTCT <b>NNK</b> CCGCACCCACGCATC         |
| F161x_F         | CCGCACCCACGCATC <b>NNK</b> GAACTGGCTCTGAAG         |
| L165x_F         | ATCTTCGAACTGGCT <b>NNK</b> AAGAAAGCCGGCGTT         |
| K171x_F         | AAGAAAGCCGGCGTT <b>NNK</b> GGCGAGAAAGCAGTG         |
| V176x_F         | AAAGGCGAGAAAGC <b>NNK</b> TACGTTGGTGACAAC          |
| Y177x_F         | GGCGAGAAAGCAGTG <b>NNK</b> GTTGGTGACAACCCG         |
| D180x_F         | GCAGTGACGTTGGT <b>NNK</b> AACCCGGTCAAAGAC          |
| S196x_F         | AACCTGGGTATGACT <b>NNK</b> KATCCTGCTGGATCGT        |
| D210x_F         | AAACGTGAATTCTGG <b>NNK</b> AAGGCGGACTTTATC         |
| L219x_F         | TTTATCGTCTCCGAC <b>NNK</b> CGCGAAGTTATTAAGATTG     |
| I223x_F         | GACCTGCGCGAAGTT <b>NNK</b> AAGATTGTTGACGAACTG      |
| Y20x_R          | AGCGCCTTCAACGCT                                    |

|                 |                                               |
|-----------------|-----------------------------------------------|
| V30x_R          | TTCCTCCATAATTTTAAAATGCA                       |
| K47x_R          | CTCGTATTCGTCCAG                               |
| Y56x_R          | GTTAGAGAACGCTTCGC                             |
| I67x_R          | ATCACGCAGCGGACG                               |
| E70x_R          | TTCCAGGATATCACGCAG                            |
| F87x_R          | GTTTTCAGGGTATTTGAAA                           |
| S91x_R          | GATTTCCACAAGTTTTT                             |
| R97x_R          | TTGCGCCATACGCAG                               |
| F153x_R         | ACCAGCTTCTTCAGA                               |
| K155x_R         | AGAGAAACCAGCTTC                               |
| F161x_R         | GATGCGTGGGTGCGG                               |
| L165x_R         | AGCCAGTTCGAAGAT                               |
| K171x_R         | AACGCCGGCTTTCTT                               |
| V176x_R         | TGCTTTCTCGCCTTT                               |
| Y177x_R         | CACTGCTTTCTCGCC                               |
| D180x_R         | ACCAACGTACACTGC                               |
| S196x_R         | AGTCATACCCAGGTT                               |
| D210x_R         | CCAGAATTCACGTTTCT                             |
| L219x_R         | GTCGGAGACGATAAAGT                             |
| I223x_R         | AACTTCGCGCAGGTC                               |
| <b>Round 14</b> |                                               |
| V16x_F          | GGTACTCTGATTAGC <b>NNK</b> GAAGGCACTTATAAAGTG |
| A19x_F          | AATAGCGTTGAAGGC <b>NNK</b> TATAAAGTGCATTTT    |
| E70x_F          | CGTGATATCCTGGA <b>NNK</b> GTAAATGCGTAAA       |
| M72x_F          | ATCCTGGAACGTGT <b>NNK</b> CGTAAACTGGCGGAA     |
| E89x_F          | CCTGAAAACCTGTGG <b>NNK</b> ATCTCCCTGCGTATG    |
| P128x_F         | AATAGGGATACCGAG <b>NNK</b> TCTACGGCATTCTCG    |
| S154x_F         | GAAGAAGCTGGTTTC <b>NNK</b> AAACCGCACCCACG     |
| V16x_R          | GCTAATCAGAGTACCC                              |
| A19x_R          | GCCTTCAACGCTAAT                               |
| E70x_R          | TTCCAGGATATCACG                               |
| M72x_R          | TACACGTTCCAGGAT                               |
| E89x_R          | CCACAAGTTTTTCAGG                              |
| P128x_R         | CTCGGTATCCCTATT                               |
| S154x_R         | GAAACCAGCTTCTTC                               |



### 3. DNA and protein sequence for the most active variant BH32.14

**Mutations from the BH32 Design:** L10W, N14I, A19T, A20Y, S22V, L24F, T49A, Y56N, E70R, F87L, S95A, M120V, T122L, D123N, S124R, P128L, A129S, M130T, F154S, E174K, Y177C, D180P, C186A, C212A

ATGATTCGTGCGGTATTCTTTGATAGCTGGGGTACTCTGATTAGCGTTGA  
AGGCACCTTATAAAGTGCATTTTAAAATTATGGAGGAAGTCTGGGTGACT  
ATCCGCTGAACCCGAAAACCCCTGCTGGACGAATACGAGAACTGGCTCGC  
GAAGCGTTCTCTAACAATGCGGGCAAACCGTATCGTCCGCTGCGTGATAT  
CCTGGAACGTGTAATGCGTAAACTGGCGGAAAAGTACGGTTTCAAATACC  
CTGAAAACCTTGTGGGAAATCTCCCTGCGTATGGCGCAACGCTACGGCGAG  
CTGTACCCGGAAGTGGTGGAAAGTACTGAAATCTCTGAAAGGTAAATATCA  
CGTTGGCGTGATCCTGAATAGGGATACCGAGCTGTCTACGGCATTCTG  
ACGCACTGGGCATCAAAGACCTGTTGACTCCATCACCACGTCTGAAGAA  
GCTGGTTTTCTCTAAACCGCACCCACGCATCTTCGAACTGGCTCTGAAGAA  
AGCCGGCGTTAAAGGCGAGAAAGCAGTGTGTGTTGGTCCTAACCCGGTCA  
AAGACGCGGGTGGTTCTAAGAACCTGGGTATGACTAGCATCCTGCTGGAT  
CGTAAAGGTGAGAAACGTGAATTCTGGGATAAGGCGGACTTTATCGTCTC  
CGACCTGCGCGAAGTTATTAAGATTGTTGACGAACTGAACGGTCAGGGCT  
CTCTCGAGTGGAGTCACCCACAGTTTGAGAAA

MIRAVFFDS**W**GT**L**ISVEG**T**Y**K**V**H**FKIMEEVLGDYPLNPKTLLDEYEK**L**AR  
EAFS**N**NAGKPYRPLRDIL**R**VMRKLAEKYGFYPEN**L**WEISLR**M**AQRYGE  
LYPEVVEVLKSLKGKYHVG**V**IL**N**RDTE**L**STAFLDALGIKDLFDSITTSEE  
AGF**S**KPHPRIFELALKKAGVK**G**E**K**AV**C**VG**P**NPVK**D**AGGSKNLGMTSILLD  
RKGEKREFWD**K**ADFIIVSDLREVIKIVDELNGQGSLEWSHPQFEK

#### 4. Cartesian coordinates for energy minimised cluster models.

|   | R            |              |              |   | TS1          |              |              |
|---|--------------|--------------|--------------|---|--------------|--------------|--------------|
| C | 2.442144000  | -2.750087000 | 2.346668000  | C | 1.584125000  | -3.435423000 | 2.735771000  |
| C | 1.957197000  | -3.759099000 | 1.338583000  | C | 1.443880000  | -3.976175000 | 1.329330000  |
| C | 1.331559000  | -3.085362000 | 0.114040000  | C | 1.345721000  | -2.845705000 | 0.299598000  |
| C | 2.274618000  | -2.049440000 | -0.506396000 | C | 2.523699000  | -1.871168000 | 0.426472000  |
| C | 2.943909000  | -1.195277000 | 0.525568000  | C | 2.780245000  | -1.469457000 | 1.868352000  |
| C | 3.009865000  | -1.510133000 | 1.835146000  | C | 2.206567000  | -2.193951000 | 2.921562000  |
| O | 2.379015000  | -2.977103000 | 3.561909000  | O | 1.108129000  | -4.102083000 | 3.710920000  |
| C | 1.063902000  | 0.507394000  | 3.232256000  | C | 0.408984000  | -0.030331000 | 3.867067000  |
| C | 0.152415000  | 0.556049000  | 2.077198000  | C | -0.227147000 | 0.240390000  | 2.561683000  |
| C | -1.029743000 | -0.203150000 | 2.055836000  | C | -1.474436000 | -0.330308000 | 2.271253000  |
| C | -1.908648000 | -0.087838000 | 0.989465000  | C | -2.116820000 | -0.022096000 | 1.083991000  |
| C | -1.576842000 | 0.787941000  | -0.048789000 | C | -1.488556000 | 0.850396000  | 0.191080000  |
| C | -0.396916000 | 1.527893000  | -0.071695000 | C | -0.230988000 | 1.406954000  | 0.431390000  |
| C | 0.470026000  | 1.405751000  | 1.009367000  | C | 0.394538000  | 1.093609000  | 1.637573000  |
| O | 0.879888000  | -0.173071000 | 4.228089000  | O | -0.110472000 | -0.700965000 | 4.741506000  |
| C | -0.933169000 | -7.122602000 | 1.692388000  | C | -1.423394000 | -7.022153000 | 1.348518000  |
| C | -1.855809000 | -6.127738000 | 1.068480000  | C | -2.198669000 | -5.920714000 | 0.702112000  |
| C | -1.922815000 | -4.767148000 | 1.273477000  | C | -2.264662000 | -4.590634000 | 1.058561000  |
| C | -2.850943000 | -6.438153000 | 0.075028000  | C | -3.065746000 | -6.079955000 | -0.437052000 |
| N | -2.897066000 | -4.212728000 | 0.459174000  | N | -3.124545000 | -3.917030000 | 0.207737000  |
| C | -3.483090000 | -5.215481000 | -0.284662000 | C | -3.628665000 | -4.803821000 | -0.718869000 |
| C | -3.248826000 | -7.629982000 | -0.555425000 | C | -3.415012000 | -7.177001000 | -1.244588000 |
| C | -4.494428000 | -5.161207000 | -1.249853000 | C | -4.520130000 | -4.605267000 | -1.777588000 |
| C | -4.254249000 | -7.580083000 | -1.514376000 | C | -4.296877000 | -6.981223000 | -2.301290000 |
| C | -4.868853000 | -6.356046000 | -1.855681000 | C | -4.843033000 | -5.705954000 | -2.563022000 |
| C | 2.267450000  | -7.890944000 | -2.331172000 | C | 1.828570000  | -7.906774000 | -2.609568000 |
| C | 1.553171000  | -6.798818000 | -1.521476000 | C | 0.718168000  | -6.955504000 | -2.135923000 |
| C | 2.412936000  | -7.555282000 | -3.818664000 | C | 2.647046000  | -7.359461000 | -3.783999000 |
| C | 0.080527000  | -6.619399000 | -1.896485000 | C | -0.377818000 | -6.701230000 | -3.174828000 |
| N | 6.591785000  | -5.591382000 | 0.323696000  | N | 6.635494000  | -6.337701000 | -0.210879000 |
| C | 6.535803000  | -4.675733000 | -0.827170000 | C | 6.282975000  | -5.080822000 | -0.881072000 |
| C | 6.648051000  | -3.258942000 | -0.325184000 | C | 6.797818000  | -3.908440000 | -0.079562000 |
| O | 7.599906000  | -2.526882000 | -0.563478000 | O | 7.580428000  | -3.069116000 | -0.499658000 |
| C | 5.229035000  | -4.879120000 | -1.595642000 | C | 4.763776000  | -4.975867000 | -1.041430000 |
| N | 8.072287000  | -0.848451000 | -3.048634000 | N | 8.152090000  | -1.322500000 | -2.963521000 |
| C | 7.056421000  | 0.157088000  | -2.709135000 | C | 7.227032000  | -0.245149000 | -2.581464000 |
| C | 7.551557000  | 1.002060000  | -1.535568000 | C | 7.800219000  | 0.527311000  | -1.388024000 |
| O | 7.719707000  | 2.226258000  | -1.626102000 | O | 8.012678000  | 1.744466000  | -1.416859000 |
| C | 5.617137000  | -0.361719000 | -2.430467000 | C | 5.764724000  | -0.681323000 | -2.275741000 |
| C | 4.667714000  | 0.807643000  | -2.140921000 | C | 4.884769000  | 0.522941000  | -1.918342000 |
| C | 5.103567000  | -1.217673000 | -3.591361000 | C | 5.163535000  | -1.467026000 | -3.444885000 |
| N | 7.781708000  | 0.344209000  | -0.377143000 | N | 8.009937000  | -0.193360000 | -0.257351000 |
| C | 8.151816000  | 1.086050000  | 0.810153000  | C | 8.284139000  | 0.483660000  | 0.995797000  |
| C | 9.252875000  | 2.090071000  | 0.489705000  | C | 9.619435000  | 1.217146000  | 0.941128000  |
| O | 9.429317000  | 3.104899000  | 1.131724000  | O | 9.888709000  | 2.143374000  | 1.676083000  |
| C | 8.709463000  | 0.136208000  | 1.888962000  | C | 8.266454000  | -0.523809000 | 2.154227000  |
| C | 7.746532000  | -0.934582000 | 2.296520000  | C | 6.911603000  | -1.143672000 | 2.274240000  |
| N | 8.165738000  | -2.162566000 | 2.769047000  | N | 6.609127000  | -2.185475000 | 3.133141000  |
| C | 6.371458000  | -0.996324000 | 2.337416000  | C | 5.731842000  | -0.857939000 | 1.628874000  |
| C | 7.060104000  | -2.898423000 | 3.074087000  | C | 5.293557000  | -2.490567000 | 3.003326000  |
| N | 5.952527000  | -2.221589000 | 2.823379000  | N | 4.753996000  | -1.706981000 | 2.087032000  |
| C | 6.644487000  | 4.981941000  | 0.593782000  | C | 7.086142000  | 4.489304000  | 0.871315000  |
| C | 5.491462000  | 4.352848000  | -0.200959000 | C | 5.886437000  | 3.933128000  | 0.092642000  |
| C | 6.281655000  | 6.246487000  | 1.379492000  | C | 6.797477000  | 5.752418000  | 1.689440000  |
| C | 4.456653000  | 3.626193000  | 0.665304000  | C | 4.791448000  | 3.323446000  | 0.973977000  |
| C | -3.640458000 | 2.490302000  | 7.456810000  | C | -3.666159000 | 2.436240000  | 7.335334000  |
| C | -2.380798000 | 1.620952000  | 7.370065000  | C | -2.368320000 | 1.621606000  | 7.279122000  |
| C | -2.719302000 | 0.139633000  | 7.584983000  | C | -2.653589000 | 0.165916000  | 6.880520000  |
| C | -1.668005000 | 1.818729000  | 6.023650000  | C | -1.359732000 | 2.265346000  | 6.317192000  |
| C | -2.867980000 | 9.260412000  | 2.170184000  | C | -2.114854000 | 9.437861000  | 2.331388000  |
| C | -2.839791000 | 7.853618000  | 1.648277000  | C | -2.159003000 | 8.055742000  | 1.754265000  |
| C | -3.531951000 | 7.360032000  | 0.569313000  | C | -2.829681000 | 7.648107000  | 0.626841000  |
| C | -2.093809000 | 6.740908000  | 2.191105000  | C | -1.513816000 | 6.879399000  | 2.287939000  |
| N | -3.261078000 | 6.010055000  | 0.404284000  | N | -2.639820000 | 6.289736000  | 0.424689000  |
| C | -2.384966000 | 5.599181000  | 1.386332000  | C | -1.837495000 | 5.789298000  | 1.427449000  |
| C | -1.221991000 | 6.593684000  | 3.284383000  | C | -0.707402000 | 6.639116000  | 3.414438000  |
| C | -1.838732000 | 4.338571000  | 1.651980000  | C | -1.381655000 | 4.488904000  | 1.667299000  |

|   |              |              |              |   |              |              |              |
|---|--------------|--------------|--------------|---|--------------|--------------|--------------|
| C | -0.682113000 | 5.340483000  | 3.555864000  | C | -0.258563000 | 5.345986000  | 3.660290000  |
| C | -0.990350000 | 4.225169000  | 2.749182000  | C | -0.594885000 | 4.282995000  | 2.796158000  |
| N | 2.009279000  | 7.219702000  | -1.076264000 | N | 2.761436000  | 7.097765000  | -0.951541000 |
| C | 1.931036000  | 5.789217000  | -0.801410000 | C | 2.491952000  | 5.702560000  | -0.624239000 |
| C | 0.990272000  | 4.923606000  | -1.612657000 | C | 1.437855000  | 4.936805000  | -1.401446000 |
| O | 1.100937000  | 3.687508000  | -1.593190000 | O | 1.336169000  | 3.708108000  | -1.276284000 |
| C | 1.574793000  | 5.638195000  | 0.692563000  | C | 2.125734000  | 5.648944000  | 0.873742000  |
| O | 2.514645000  | 6.330978000  | 1.494346000  | O | 3.142485000  | 6.255134000  | 1.652020000  |
| N | 0.013285000  | 5.570499000  | -2.270612000 | N | 0.613868000  | 5.680198000  | -2.165140000 |
| C | -1.031772000 | 4.871696000  | -2.992421000 | C | -0.465449000 | 5.087293000  | -2.925447000 |
| C | -0.479801000 | 4.567306000  | -4.392350000 | C | 0.094726000  | 4.712702000  | -4.301544000 |
| O | -1.002955000 | 4.933101000  | -5.426886000 | O | -0.415027000 | 5.027477000  | -5.359835000 |
| C | -2.344488000 | 5.660395000  | -3.013333000 | C | -1.717242000 | 5.967525000  | -2.990639000 |
| C | -3.611401000 | 4.783897000  | -2.987158000 | C | -3.041993000 | 5.180448000  | -2.937205000 |
| C | -4.858536000 | 5.676991000  | -2.965736000 | C | -4.224349000 | 6.156146000  | -2.980882000 |
| C | -3.694191000 | 3.786527000  | -4.149657000 | C | -3.176281000 | 4.122926000  | -4.040671000 |
| N | 2.213380000  | 2.406020000  | -4.398265000 | N | 2.637650000  | 2.416916000  | -4.291817000 |
| C | 1.904096000  | 0.978717000  | -4.485538000 | C | 2.208309000  | 1.028599000  | -4.469594000 |
| C | 1.187153000  | 0.710877000  | -5.796294000 | C | 1.454356000  | 0.907681000  | -5.780798000 |
| O | 1.344277000  | -0.278531000 | -6.483973000 | O | 1.492294000  | -0.060284000 | -6.514338000 |
| C | 0.947727000  | 0.590413000  | -3.345135000 | C | 1.232732000  | 0.644289000  | -3.341981000 |
| C | -5.618704000 | -2.579417000 | 4.849235000  | C | -5.840607000 | -2.233290000 | 4.528793000  |
| C | -4.262483000 | -3.120608000 | 4.389497000  | C | -4.837702000 | -3.355262000 | 4.267082000  |
| C | -3.449775000 | -3.639837000 | 5.581337000  | C | -4.141723000 | -3.776593000 | 5.564325000  |
| N | -2.166874000 | -4.241706000 | 5.209374000  | N | -3.114176000 | -4.801225000 | 5.366166000  |
| C | -1.044048000 | -3.573410000 | 4.922891000  | C | -1.916864000 | -4.568183000 | 4.823569000  |
| N | 0.038124000  | -4.243177000 | 4.516773000  | N | -1.099483000 | -5.572181000 | 4.501852000  |
| N | -1.001183000 | -2.242734000 | 5.044140000  | N | -1.513495000 | -3.312097000 | 4.569783000  |
| N | -7.598589000 | 2.030436000  | 0.914829000  | N | -7.382459000 | 2.640454000  | 0.690902000  |
| C | -7.286066000 | 2.006759000  | -0.528084000 | C | -6.991124000 | 2.637152000  | -0.732685000 |
| C | -7.079900000 | 0.574235000  | -1.044579000 | C | -6.847277000 | 1.207687000  | -1.279120000 |
| O | -6.894025000 | 0.327457000  | -2.239828000 | O | -6.595651000 | 0.977923000  | -2.465671000 |
| C | -5.982451000 | 2.831035000  | -0.684258000 | C | -5.628164000 | 3.373466000  | -0.790200000 |
| C | -5.365464000 | 2.773202000  | 0.719936000  | C | -5.092976000 | 3.222119000  | 0.640435000  |
| C | -6.599020000 | 2.860447000  | 1.620163000  | C | -6.364071000 | 3.368406000  | 1.478787000  |
| N | -7.101710000 | -0.354075000 | -0.062053000 | N | -6.999235000 | 0.254384000  | -0.332544000 |
| C | -6.995951000 | -1.779788000 | -0.261845000 | C | -6.998988000 | -1.166956000 | -0.587870000 |
| C | -8.319405000 | -2.457682000 | 0.076475000  | C | -8.370796000 | -1.751631000 | -0.267282000 |
| O | -8.408284000 | -3.552248000 | 0.591170000  | O | -8.541440000 | -2.843773000 | 0.231152000  |
| C | -5.841051000 | -2.372097000 | 0.545376000  | C | -5.891386000 | -1.882246000 | 0.178168000  |
| O | -4.578374000 | -1.948907000 | 0.038930000  | O | -4.607216000 | -1.533467000 | -0.331568000 |
| H | 3.499417000  | -0.866278000 | 2.555300000  | H | 2.327537000  | -1.838060000 | 3.937530000  |
| H | 2.839024000  | -4.343993000 | 1.037862000  | H | 2.320797000  | -4.605867000 | 1.122646000  |
| H | 1.264412000  | -4.451741000 | 1.820935000  | H | 0.568066000  | -4.628058000 | 1.286539000  |
| H | 0.402278000  | -2.587829000 | 0.413067000  | H | 0.403710000  | -2.306111000 | 0.452856000  |
| H | 1.065183000  | -3.846400000 | -0.620207000 | H | 1.316635000  | -3.254268000 | -0.714186000 |
| H | 3.061358000  | -2.544412000 | -1.096022000 | H | 3.427947000  | -2.331571000 | 0.018657000  |
| H | 1.735329000  | -1.414020000 | -1.216481000 | H | 2.337760000  | -0.971203000 | -0.167412000 |
| H | 3.405582000  | -0.271105000 | 0.186935000  | H | 2.958437000  | -0.412953000 | 2.039059000  |
| H | 1.949628000  | 1.158219000  | 3.165999000  | H | 1.386702000  | 0.449987000  | 4.030621000  |
| H | -1.260196000 | -0.870011000 | 2.876595000  | H | -1.934042000 | -1.004538000 | 2.983169000  |
| H | -0.163545000 | 2.202714000  | -0.885146000 | H | 0.222657000  | 2.091240000  | -0.278393000 |
| H | 1.387837000  | 1.984087000  | 1.024437000  | H | 1.359337000  | 1.534679000  | 1.867658000  |
| H | -0.347767000 | -7.651762000 | 0.931428000  | H | -0.910961000 | -7.639110000 | 0.603143000  |
| H | -0.224712000 | -6.645113000 | 2.375661000  | H | -0.662301000 | -6.632160000 | 2.028487000  |
| H | -1.342599000 | -4.140801000 | 1.935960000  | H | -1.771891000 | -4.061619000 | 1.861375000  |
| H | -3.209366000 | -3.247496000 | 0.449506000  | H | -3.358750000 | -2.931325000 | 0.231877000  |
| H | -2.774460000 | -8.572830000 | -0.297988000 | H | -2.995945000 | -8.159783000 | -1.048045000 |
| H | -4.963264000 | -4.229587000 | -1.534793000 | H | -4.945826000 | -3.635202000 | -1.985479000 |
| H | -4.571277000 | -8.492266000 | -2.011335000 | H | -4.570372000 | -7.818486000 | -2.936609000 |
| H | -5.646463000 | -6.339758000 | -2.613672000 | H | -5.526549000 | -5.571953000 | -3.396001000 |
| H | 3.264603000  | -8.057169000 | -1.903634000 | H | 2.502410000  | -8.113178000 | -1.768430000 |
| H | 2.089887000  | -5.848125000 | -1.653023000 | H | 1.169523000  | -5.998672000 | -1.834944000 |
| H | 1.623923000  | -7.039724000 | -0.452998000 | H | 0.257907000  | -7.370282000 | -1.231375000 |
| H | 2.962329000  | -8.338537000 | -4.350920000 | H | 3.465066000  | -8.037012000 | -4.049263000 |
| H | 2.959304000  | -6.613962000 | -3.952150000 | H | 3.086752000  | -6.386825000 | -3.532979000 |
| H | 1.439539000  | -7.444843000 | -4.306875000 | H | 2.030286000  | -7.220471000 | -4.677503000 |
| H | -0.040702000 | -6.297624000 | -2.934892000 | H | 0.017490000  | -6.216169000 | -4.072624000 |
| H | -0.406121000 | -5.876735000 | -1.260291000 | H | -1.162521000 | -6.058315000 | -2.768431000 |
| H | -0.471520000 | -7.557212000 | -1.771829000 | H | -0.847094000 | -7.643152000 | -3.481574000 |
| H | 5.803667000  | -5.427824000 | 0.948273000  | H | 6.191426000  | -6.391000000 | 0.704352000  |

|   |              |              |              |   |              |              |              |
|---|--------------|--------------|--------------|---|--------------|--------------|--------------|
| H | 7.438384000  | -5.434859000 | 0.866209000  | H | 7.639917000  | -6.396441000 | -0.058895000 |
| H | 7.396657000  | -4.873740000 | -1.473308000 | H | 6.768953000  | -5.055500000 | -1.861668000 |
| H | 5.833755000  | -2.916821000 | 0.340576000  | H | 6.447356000  | -3.870362000 | 0.970074000  |
| H | 5.143096000  | -5.924795000 | -1.902219000 | H | 4.392214000  | -5.865592000 | -1.556130000 |
| H | 5.187324000  | -4.242974000 | -2.483929000 | H | 4.486154000  | -4.089875000 | -1.619033000 |
| H | 4.366397000  | -4.640216000 | -0.963971000 | H | 4.274184000  | -4.917749000 | -0.063208000 |
| H | 8.049745000  | -1.617576000 | -2.381996000 | H | 8.027367000  | -2.124128000 | -2.346321000 |
| H | 7.850248000  | -1.249072000 | -3.955732000 | H | 7.911900000  | -1.644878000 | -3.896872000 |
| H | 6.999406000  | 0.856610000  | -3.549820000 | H | 7.205316000  | 0.479688000  | -3.401688000 |
| H | 5.657794000  | -0.993470000 | -1.535543000 | H | 5.798072000  | -1.349579000 | -1.406112000 |
| H | 4.637121000  | 1.509127000  | -2.981857000 | H | 4.810343000  | 1.219736000  | -2.760229000 |
| H | 4.966578000  | 1.368704000  | -1.251159000 | H | 5.273723000  | 1.085735000  | -1.065292000 |
| H | 3.648408000  | 0.445781000  | -1.981532000 | H | 3.872638000  | 0.193375000  | -1.665582000 |
| H | 5.742971000  | -2.088059000 | -3.764350000 | H | 5.730214000  | -2.378562000 | -3.654163000 |
| H | 5.065456000  | -0.636640000 | -4.520713000 | H | 5.148089000  | -0.860143000 | -4.358295000 |
| H | 4.093236000  | -1.584226000 | -3.383208000 | H | 4.132927000  | -1.760283000 | -3.219430000 |
| H | 7.637854000  | -0.663126000 | -0.308368000 | H | 7.851995000  | -1.197435000 | -0.245663000 |
| H | 7.298260000  | 1.645830000  | 1.213261000  | H | 7.524864000  | 1.253185000  | 1.180804000  |
| H | 9.953628000  | 1.765776000  | -0.305194000 | H | 10.341750000 | 0.821063000  | 0.198499000  |
| H | 8.993671000  | 0.749586000  | 2.751591000  | H | 8.531284000  | 0.006370000  | 3.075096000  |
| H | 9.629772000  | -0.325872000 | 1.511821000  | H | 9.028155000  | -1.296327000 | 1.994348000  |
| H | 9.125349000  | -2.464903000 | 2.862842000  | H | 7.254826000  | -2.637135000 | 3.767204000  |
| H | 5.668535000  | -0.235465000 | 2.031471000  | H | 5.527007000  | -0.121104000 | 0.870393000  |
| H | 7.120278000  | -3.902144000 | 3.468723000  | H | 4.776152000  | -3.244275000 | 3.576894000  |
| H | 7.064811000  | 4.230707000  | 1.273676000  | H | 7.483929000  | 3.705964000  | 1.531325000  |
| H | 5.916807000  | 3.644823000  | -0.918794000 | H | 6.254890000  | 3.176633000  | -0.606963000 |
| H | 4.996569000  | 5.137649000  | -0.790218000 | H | 5.459693000  | 4.741004000  | -0.517855000 |
| H | 5.946707000  | 7.042360000  | 0.703449000  | H | 6.451662000  | 6.565233000  | 1.039825000  |
| H | 7.142040000  | 6.624292000  | 1.941692000  | H | 7.694813000  | 6.098708000  | 2.212723000  |
| H | 5.468185000  | 6.064946000  | 2.089709000  | H | 6.015880000  | 5.583487000  | 2.436673000  |
| H | 3.655413000  | 3.203520000  | 0.048065000  | H | 3.968468000  | 2.931423000  | 0.365244000  |
| H | 3.993821000  | 4.303117000  | 1.388352000  | H | 4.370905000  | 4.066771000  | 1.656098000  |
| H | 4.925764000  | 2.800886000  | 1.215770000  | H | 5.188677000  | 2.493340000  | 1.571573000  |
| H | -3.400210000 | 3.551263000  | 7.329502000  | H | -3.475627000 | 3.468845000  | 7.647268000  |
| H | -4.354449000 | 2.212972000  | 6.671442000  | H | -4.143231000 | 2.468341000  | 6.347920000  |
| H | -1.693379000 | 1.931663000  | 8.169105000  | H | -1.923907000 | 1.617370000  | 8.284430000  |
| H | -3.408220000 | -0.210122000 | 6.804220000  | H | -3.098007000 | 0.124782000  | 5.877555000  |
| H | -3.206728000 | -0.028644000 | 8.550967000  | H | -3.354730000 | -0.307753000 | 7.576598000  |
| H | -1.816922000 | -0.481852000 | 7.553243000  | H | -1.733989000 | -0.427803000 | 6.860662000  |
| H | -0.748960000 | 1.225305000  | 5.967567000  | H | -0.413299000 | 1.715234000  | 6.308496000  |
| H | -1.405179000 | 2.868892000  | 5.855155000  | H | -1.148118000 | 3.303473000  | 6.595439000  |
| H | -2.316824000 | 1.505191000  | 5.195471000  | H | -1.751429000 | 2.271408000  | 5.292287000  |
| H | -3.525119000 | 9.889869000  | 1.564171000  | H | -2.697292000 | 10.136659000 | 1.724726000  |
| H | -3.227583000 | 9.297099000  | 3.205434000  | H | -2.518862000 | 9.460907000  | 3.350682000  |
| H | -4.207923000 | 7.867560000  | -0.104032000 | H | -3.438134000 | 8.222701000  | -0.056941000 |
| H | -3.662439000 | 5.420676000  | -0.306641000 | H | -3.032483000 | 5.755026000  | -0.332685000 |
| H | -0.979282000 | 7.446796000  | 3.911411000  | H | -0.444061000 | 7.452443000  | 4.084575000  |
| H | -2.069844000 | 3.481097000  | 1.029863000  | H | -1.634729000 | 3.674268000  | 0.998579000  |
| H | -0.011034000 | 5.214283000  | 4.400085000  | H | 0.361162000  | 5.146058000  | 4.529130000  |
| H | -0.554543000 | 3.260914000  | 2.985884000  | H | -0.227054000 | 3.286689000  | 3.012479000  |
| H | 2.357627000  | 7.428995000  | -2.005685000 | H | 3.156316000  | 7.222159000  | -1.877579000 |
| H | 1.126383000  | 7.702388000  | -0.930573000 | H | 1.945420000  | 7.695417000  | -0.848821000 |
| H | 2.928478000  | 5.368569000  | -0.949883000 | H | 3.423530000  | 5.146501000  | -0.759086000 |
| H | 0.553964000  | 6.016132000  | 0.856842000  | H | 1.156305000  | 6.150362000  | 1.022835000  |
| H | 1.588730000  | 4.585466000  | 0.976835000  | H | 2.014540000  | 4.612099000  | 1.192975000  |
| H | 2.732682000  | 7.128478000  | 0.981437000  | H | 3.462872000  | 6.991688000  | 1.102665000  |
| H | 0.050890000  | 6.577946000  | -2.329893000 | H | 0.824730000  | 6.658922000  | -2.297273000 |
| H | -1.162494000 | 3.906162000  | -2.489838000 | H | -0.686280000 | 4.136504000  | -2.423179000 |
| H | 0.467586000  | 3.994261000  | -4.397262000 | H | 1.030050000  | 4.120339000  | -4.267881000 |
| H | -2.362993000 | 6.296163000  | -3.905642000 | H | -1.690334000 | 6.562104000  | -3.910654000 |
| H | -2.360777000 | 6.322491000  | -2.141844000 | H | -1.690760000 | 6.667864000  | -2.149795000 |
| H | -3.582029000 | 4.190393000  | -2.059853000 | H | -3.063462000 | 4.635344000  | -1.979842000 |
| H | -4.912534000 | 6.276145000  | -3.881699000 | H | -4.224447000 | 6.709435000  | -3.926868000 |
| H | -4.854090000 | 6.374707000  | -2.120941000 | H | -4.179727000 | 6.893465000  | -2.171594000 |
| H | -5.772084000 | 5.078539000  | -2.903978000 | H | -5.178717000 | 5.627278000  | -2.904219000 |
| H | -3.696932000 | 4.310954000  | -5.110170000 | H | -3.108415000 | 4.583877000  | -5.030523000 |
| H | -4.613975000 | 3.196536000  | -4.075827000 | H | -4.143513000 | 3.614925000  | -3.962171000 |
| H | -2.857841000 | 3.084433000  | -4.149403000 | H | -2.401043000 | 3.356587000  | -3.967512000 |
| H | 3.098988000  | 2.621123000  | -4.845824000 | H | 3.521742000  | 2.592226000  | -4.760369000 |
| H | 2.264420000  | 2.708276000  | -3.428431000 | H | 2.760792000  | 2.629391000  | -3.305349000 |
| H | 2.786003000  | 0.326277000  | -4.449754000 | H | 3.033212000  | 0.304045000  | -4.489038000 |

|   |              |              |              |   |              |              |              |
|---|--------------|--------------|--------------|---|--------------|--------------|--------------|
| H | 0.464010000  | 1.508464000  | -6.075907000 | H | 0.819803000  | 1.791794000  | -6.010983000 |
| H | 0.011128000  | 1.151211000  | -3.408380000 | H | 0.328883000  | 1.258325000  | -3.376203000 |
| H | 1.414115000  | 0.831078000  | -2.385592000 | H | 1.712374000  | 0.812662000  | -2.372806000 |
| H | 0.718044000  | -0.475251000 | -3.373637000 | H | 0.944534000  | -0.404959000 | -3.417999000 |
| H | -5.495834000 | -1.746382000 | 5.549503000  | H | -5.339514000 | -1.338367000 | 4.914644000  |
| H | -6.203040000 | -2.216610000 | 3.999030000  | H | -6.363762000 | -1.953124000 | 3.609994000  |
| H | -3.700703000 | -2.337890000 | 3.865844000  | H | -4.088745000 | -3.029329000 | 3.536782000  |
| H | -4.399065000 | -3.938450000 | 3.673161000  | H | -5.340583000 | -4.228342000 | 3.836676000  |
| H | -3.274141000 | -2.847584000 | 6.317086000  | H | -3.694392000 | -2.912338000 | 6.067217000  |
| H | -4.008739000 | -4.417514000 | 6.105903000  | H | -4.862831000 | -4.194839000 | 6.269265000  |
| H | -2.164319000 | -5.235221000 | 5.034122000  | H | -3.389862000 | -5.764979000 | 5.480941000  |
| H | 0.016202000  | -5.249252000 | 4.474728000  | H | -1.415251000 | -6.527896000 | 4.525338000  |
| H | 0.915868000  | -3.782112000 | 4.264714000  | H | -0.186724000 | -5.339827000 | 4.101929000  |
| H | -0.183850000 | -1.689992000 | 4.804500000  | H | -0.545157000 | -3.203840000 | 4.288822000  |
| H | -1.810081000 | -1.735446000 | 5.361458000  | H | -1.915154000 | -2.536329000 | 5.071747000  |
| H | -8.546637000 | 2.343957000  | 1.087348000  | H | -8.312195000 | 3.020926000  | 0.822959000  |
| H | -8.090542000 | 2.431261000  | -1.137251000 | H | -7.731103000 | 3.129469000  | -1.371607000 |
| H | -5.336239000 | 2.432918000  | -1.468162000 | H | -4.968711000 | 2.958847000  | -1.554233000 |
| H | -6.238530000 | 3.863278000  | -0.938323000 | H | -5.798196000 | 4.429938000  | -1.015664000 |
| H | -4.655379000 | 3.578630000  | 0.917323000  | H | -4.336541000 | 3.964769000  | 0.902953000  |
| H | -4.848332000 | 1.820223000  | 0.870662000  | H | -4.655241000 | 2.228231000  | 0.780077000  |
| H | -6.421129000 | 2.475129000  | 2.628968000  | H | -6.269332000 | 2.934672000  | 2.479087000  |
| H | -6.923903000 | 3.906899000  | 1.709748000  | H | -6.617927000 | 4.431878000  | 1.593149000  |
| H | -7.322722000 | 0.046458000  | 0.852283000  | H | -7.246749000 | 0.642216000  | 0.580600000  |
| H | -6.834670000 | -1.959544000 | -1.330977000 | H | -6.857276000 | -1.305730000 | -1.666402000 |
| H | -9.215715000 | -1.863036000 | -0.196214000 | H | -9.219075000 | -1.087086000 | -0.531325000 |
| H | -5.864993000 | -3.459206000 | 0.475783000  | H | -5.999143000 | -2.960683000 | 0.062266000  |
| H | -5.949949000 | -2.093939000 | 1.601567000  | H | -5.963757000 | -1.641704000 | 1.246144000  |
| H | -4.576847000 | -0.986896000 | -0.085067000 | H | -4.542883000 | -0.570739000 | -0.440639000 |
| H | -4.142628000 | 2.370062000  | 8.422738000  | H | -4.382748000 | 1.997052000  | 8.037849000  |
| H | -6.203674000 | -3.357660000 | 5.350168000  | H | -6.595586000 | -2.537498000 | 5.261556000  |
| H | -1.869193000 | 9.713045000  | 2.163951000  | H | -1.087918000 | 9.818460000  | 2.388282000  |
| H | 7.456499000  | 5.224476000  | -0.103388000 | H | 7.891525000  | 4.707628000  | 0.158289000  |
| H | 1.721662000  | -8.837178000 | -2.216457000 | H | 1.382224000  | -8.870373000 | -2.890455000 |
| H | -1.480392000 | -7.884544000 | 2.260409000  | H | -2.072047000 | -7.695700000 | 1.923808000  |
| N | -5.732712000 | -0.564133000 | -5.008653000 | N | -5.483400000 | 0.135172000  | -5.203514000 |
| C | -4.694788000 | -1.519037000 | -4.556770000 | C | -4.557261000 | -0.948053000 | -4.806673000 |
| C | -5.233439000 | -2.142150000 | -3.293296000 | C | -5.221970000 | -1.693536000 | -3.675720000 |
| O | -5.922014000 | -3.149980000 | -3.257854000 | O | -6.008440000 | -2.615573000 | -3.822411000 |
| C | -3.384964000 | -0.751176000 | -4.325143000 | C | -3.216005000 | -0.320414000 | -4.387753000 |
| C | -2.219112000 | -1.635703000 | -3.952932000 | C | -2.134641000 | -1.318961000 | -4.040000000 |
| C | -1.196329000 | -1.885334000 | -4.876204000 | C | -1.133016000 | -1.627901000 | -4.969684000 |
| C | -2.140245000 | -2.242536000 | -2.689729000 | C | -2.101382000 | -1.955642000 | -2.789343000 |
| C | -0.116964000 | -2.708524000 | -4.549467000 | C | -0.121156000 | -2.538925000 | -4.661042000 |
| C | -1.075543000 | -3.082846000 | -2.367074000 | C | -1.099252000 | -2.877155000 | -2.480633000 |
| C | -0.054130000 | -3.312547000 | -3.292601000 | C | -0.101163000 | -3.167214000 | -3.413976000 |
| H | -5.987097000 | 0.044497000  | -4.227797000 | H | -5.739290000 | 0.674035000  | -4.373650000 |
| H | -6.579991000 | -1.081843000 | -5.235817000 | H | -6.350699000 | -0.280380000 | -5.539077000 |
| H | -5.060894000 | -1.545701000 | -2.382137000 | H | -5.026610000 | -1.276064000 | -2.673398000 |
| H | -3.560544000 | -0.005607000 | -3.541060000 | H | -3.400630000 | 0.340533000  | -3.532934000 |
| H | -1.231484000 | -1.412494000 | -5.853072000 | H | -1.128833000 | -1.131098000 | -5.935426000 |
| H | -2.909819000 | -2.062090000 | -1.946538000 | H | -2.858554000 | -1.730104000 | -2.046609000 |
| H | -1.054432000 | -3.553773000 | -1.391492000 | H | -1.102070000 | -3.364355000 | -1.511348000 |
| H | 0.782820000  | -3.954985000 | -3.038779000 | H | 0.683719000  | -3.876894000 | -3.172538000 |
| H | 0.679600000  | -2.858193000 | -5.271183000 | H | 0.660093000  | -2.737494000 | -5.387948000 |
| H | -4.568626000 | -2.290450000 | -5.322480000 | H | -4.423162000 | -1.624401000 | -5.657144000 |
| H | -3.162357000 | -0.198058000 | -5.241672000 | H | -2.886050000 | 0.315615000  | -5.213996000 |
| H | -2.822982000 | -0.663072000 | 0.964761000  | H | -3.077452000 | -0.457796000 | 0.859164000  |
| N | -2.521118000 | 0.974162000  | -1.151687000 | N | -2.198180000 | 1.229857000  | -1.032837000 |
| O | -3.639193000 | 0.451151000  | -1.068702000 | O | -3.374581000 | 0.865988000  | -1.169584000 |
| O | -2.171512000 | 1.654116000  | -2.112794000 | O | -1.605873000 | 1.907838000  | -1.866916000 |
| O | 3.105195000  | -1.234800000 | 5.650869000  | O | 1.325573000  | -2.787357000 | 6.216627000  |
| H | 2.400956000  | -0.596492000 | 5.462784000  | H | 0.883753000  | -1.967269000 | 5.943620000  |
| H | 2.989177000  | -1.869510000 | 4.920211000  | H | 1.349692000  | -3.317158000 | 5.394181000  |

Int1

|   |             |              |              |
|---|-------------|--------------|--------------|
| C | 1.110688000 | -2.837864000 | 2.366025000  |
| C | 0.736255000 | -3.025572000 | 0.907583000  |
| C | 1.518045000 | -2.130432000 | -0.059790000 |

TS2

|   |             |              |              |
|---|-------------|--------------|--------------|
| C | 1.455925000 | -3.154544000 | 2.151346000  |
| C | 1.021808000 | -3.285549000 | 0.705717000  |
| C | 1.661776000 | -2.262317000 | -0.238077000 |

|   |              |              |              |   |              |              |              |
|---|--------------|--------------|--------------|---|--------------|--------------|--------------|
| C | 2.990479000  | -2.068327000 | 0.338810000  | C | 3.131272000  | -2.055998000 | 0.126236000  |
| C | 3.121031000  | -1.450746000 | 1.737072000  | C | 3.240030000  | -1.441801000 | 1.530990000  |
| C | 2.172604000  | -2.047496000 | 2.720527000  | C | 2.326249000  | -2.090290000 | 2.547522000  |
| O | 0.361589000  | -3.431486000 | 3.244145000  | O | 0.997796000  | -3.953794000 | 2.999362000  |
| C | 0.618724000  | -0.010829000 | 3.710291000  | C | 1.085405000  | -0.719908000 | 3.386128000  |
| C | -0.040492000 | 0.272665000  | 2.416596000  | C | 0.239323000  | -0.218905000 | 2.254238000  |
| C | -1.312800000 | -0.261958000 | 2.160749000  | C | -1.027844000 | -0.782623000 | 2.033310000  |
| C | -1.982559000 | 0.061713000  | 0.993261000  | C | -1.853460000 | -0.300608000 | 1.031113000  |
| C | -1.363947000 | 0.924381000  | 0.082352000  | C | -1.400063000 | 0.755601000  | 0.234284000  |
| C | -0.089407000 | 1.456478000  | 0.294997000  | C | -0.142135000 | 1.337655000  | 0.416949000  |
| C | 0.565808000  | 1.123037000  | 1.478347000  | C | 0.663740000  | 0.847449000  | 1.442066000  |
| O | 0.043592000  | -0.554753000 | 4.643075000  | O | 0.511685000  | -1.270982000 | 4.390853000  |
| C | -1.816191000 | -6.956180000 | 1.415531000  | C | -1.404354000 | -6.985466000 | 1.495114000  |
| C | -2.622234000 | -5.857484000 | 0.799776000  | C | -2.246940000 | -5.948045000 | 0.831151000  |
| C | -2.565226000 | -4.507000000 | 1.065292000  | C | -2.384738000 | -4.622631000 | 1.177808000  |
| C | -3.596716000 | -6.025028000 | -0.247725000 | C | -3.099205000 | -6.160838000 | -0.310146000 |
| N | -3.438585000 | -3.824726000 | 0.235939000  | N | -3.273888000 | -3.999030000 | 0.321306000  |
| C | -4.078450000 | -4.728402000 | -0.585829000 | C | -3.725417000 | -4.915674000 | -0.602799000 |
| C | -4.083547000 | -7.142043000 | -0.948864000 | C | -3.385212000 | -7.277994000 | -1.114952000 |
| C | -5.015147000 | -4.528621000 | -1.606281000 | C | -4.613406000 | -4.767592000 | -1.673371000 |
| C | -5.018564000 | -6.947824000 | -1.959328000 | C | -4.265648000 | -7.131390000 | -2.181662000 |
| C | -5.476322000 | -5.652561000 | -2.283860000 | C | -4.871578000 | -5.886174000 | -2.457276000 |
| C | 1.418570000  | -8.068209000 | -2.499468000 | C | 1.837689000  | -7.890719000 | -2.467888000 |
| C | 0.738691000  | -6.945361000 | -1.701217000 | C | 0.356699000  | -7.586940000 | -2.187175000 |
| C | 1.731814000  | -7.687587000 | -3.949907000 | C | 2.654837000  | -6.645569000 | -2.832730000 |
| C | -0.667921000 | -6.601226000 | -2.196239000 | C | -0.427158000 | -7.103440000 | -3.411474000 |
| N | 6.311025000  | -6.785103000 | -0.144107000 | N | 7.252270000  | -5.947722000 | -1.394400000 |
| C | 6.011069000  | -5.485078000 | -0.752297000 | C | 6.283048000  | -5.024472000 | -0.783501000 |
| C | 6.458122000  | -4.367955000 | 0.156373000  | C | 7.047715000  | -4.070897000 | 0.099073000  |
| O | 7.226503000  | -3.475515000 | -0.167153000 | O | 7.237202000  | -2.893147000 | -0.165360000 |
| C | 4.510384000  | -5.370210000 | -1.042306000 | C | 5.234987000  | -5.810174000 | 0.002885000  |
| N | 8.063553000  | -1.921387000 | -2.774248000 | N | 8.051700000  | -1.361821000 | -2.820441000 |
| C | 7.249056000  | -0.730004000 | -2.490796000 | C | 7.194604000  | -0.200498000 | -2.533622000 |
| C | 7.852562000  | 0.019887000  | -1.298685000 | C | 7.775980000  | 0.589639000  | -1.354667000 |
| O | 8.202126000  | 1.203435000  | -1.350962000 | O | 8.005285000  | 1.802203000  | -1.405346000 |
| C | 5.736511000  | -0.989026000 | -2.243636000 | C | 5.703009000  | -0.535616000 | -2.260472000 |
| C | 4.990324000  | 0.325720000  | -1.989095000 | C | 4.893123000  | 0.727656000  | -1.949581000 |
| C | 5.104752000  | -1.766113000 | -3.402020000 | C | 5.087224000  | -1.309368000 | -3.430048000 |
| N | 7.935840000  | -0.685848000 | -0.141662000 | N | 7.969669000  | -0.115567000 | -0.210326000 |
| C | 8.310905000  | -0.025503000 | 1.089951000  | C | 8.261547000  | 0.568153000  | 1.032334000  |
| C | 9.740455000  | 0.507242000  | 1.021312000  | C | 9.638404000  | 1.225627000  | 0.997742000  |
| O | 10.135935000 | 1.402936000  | 1.735475000  | O | 9.935931000  | 2.154483000  | 1.717175000  |
| C | 8.145655000  | -0.977268000 | 2.281558000  | C | 8.159442000  | -0.406011000 | 2.215707000  |
| C | 6.716555000  | -1.389422000 | 2.404636000  | C | 6.789693000  | -0.998867000 | 2.273852000  |
| N | 6.278953000  | -2.454262000 | 3.171994000  | N | 6.498687000  | -2.209691000 | 2.874041000  |
| C | 5.595120000  | -0.877425000 | 1.812724000  | C | 5.610466000  | -0.565245000 | 1.732907000  |
| C | 4.948707000  | -2.588259000 | 3.056318000  | C | 5.204393000  | -2.511022000 | 2.704368000  |
| N | 4.517981000  | -1.634212000 | 2.229192000  | N | 4.645649000  | -1.513826000 | 2.011801000  |
| C | 7.347068000  | 4.040892000  | 0.912966000  | C | 7.041558000  | 4.565998000  | 0.874281000  |
| C | 6.120917000  | 3.532508000  | 0.145116000  | C | 5.842584000  | 3.991137000  | 0.109922000  |
| C | 7.123597000  | 5.327111000  | 1.715354000  | C | 6.749296000  | 5.835350000  | 1.681476000  |
| C | 4.981695000  | 3.031965000  | 1.039463000  | C | 4.746956000  | 3.407675000  | 1.007890000  |
| C | -3.553036000 | 2.520561000  | 7.792771000  | C | -3.764714000 | 2.289587000  | 7.620434000  |
| C | -2.320076000 | 1.789732000  | 7.249283000  | C | -2.372503000 | 1.709330000  | 7.346163000  |
| C | -2.671910000 | 0.354939000  | 6.825823000  | C | -2.474764000 | 0.290539000  | 6.763989000  |
| C | -1.693442000 | 2.559479000  | 6.077646000  | C | -1.570205000 | 2.620851000  | 6.406760000  |
| C | -1.567427000 | 9.525774000  | 2.226872000  | C | -2.180178000 | 9.479126000  | 3.231290000  |
| C | -1.697321000 | 8.138576000  | 1.673239000  | C | -2.245266000 | 8.117540000  | 1.696081000  |
| C | -2.389187000 | 7.757776000  | 0.549228000  | C | -2.924829000 | 7.773205000  | 0.552823000  |
| C | -1.131198000 | 6.930511000  | 2.227384000  | C | -1.615136000 | 6.905467000  | 2.170581000  |
| N | -2.287656000 | 6.386966000  | 0.368502000  | N | -2.749400000 | 6.426135000  | 0.280540000  |
| C | -1.522735000 | 5.850745000  | 1.381983000  | C | -1.950759000 | 5.865638000  | 1.253363000  |
| C | -0.344870000 | 6.653656000  | 3.359736000  | C | -0.816921000 | 6.588729000  | 3.284687000  |
| C | -1.153985000 | 4.526637000  | 1.641696000  | C | -1.504351000 | 4.549042000  | 1.413958000  |
| C | 0.017725000  | 5.337310000  | 3.625519000  | C | -0.387959000 | 5.276531000  | 3.459746000  |
| C | -0.384951000 | 4.285448000  | 2.775911000  | C | -0.726414000 | 4.267579000  | 2.532782000  |
| N | 3.173193000  | 6.889694000  | -0.943884000 | N | 2.702382000  | 7.133987000  | -0.954805000 |
| C | 2.845517000  | 5.500669000  | -0.642867000 | C | 2.435189000  | 5.740458000  | -0.614781000 |
| C | 1.795932000  | 4.781988000  | -1.468340000 | C | 1.381768000  | 4.969681000  | -1.386709000 |
| O | 1.670757000  | 3.550661000  | -1.391192000 | O | 1.300599000  | 3.738430000  | -1.275763000 |
| C | 2.418010000  | 5.448292000  | 0.839072000  | C | 2.067746000  | 5.702325000  | 0.882231000  |

|   |              |              |              |   |              |              |              |
|---|--------------|--------------|--------------|---|--------------|--------------|--------------|
| O | 3.426047000  | 6.009080000  | 1.661635000  | O | 3.082375000  | 6.320014000  | 1.655105000  |
| N | 0.993274000  | 5.566695000  | -2.210525000 | N | 0.530157000  | 5.707488000  | -2.127441000 |
| C | -0.119443000 | 5.032265000  | -2.968825000 | C | -0.527698000 | 5.087347000  | -2.898501000 |
| C | 0.417143000  | 4.655020000  | -4.355162000 | C | 0.075833000  | 4.656311000  | -4.239704000 |
| O | -0.046010000 | 5.063150000  | -5.402998000 | O | -0.420300000 | 4.889781000  | -5.325272000 |
| C | -1.316942000 | 5.985544000  | -3.017274000 | C | -1.776340000 | 5.962490000  | -3.044063000 |
| C | -2.687383000 | 5.279885000  | -3.001300000 | C | -3.102123000 | 5.175906000  | -2.987571000 |
| C | -3.806858000 | 6.327589000  | -3.040626000 | C | -4.286143000 | 6.143610000  | -3.106215000 |
| C | -2.870068000 | 4.260025000  | -4.132722000 | C | -3.208051000 | 4.066467000  | -4.042199000 |
| N | 2.779718000  | 2.193013000  | -4.277574000 | N | 2.654434000  | 2.401868000  | -4.295865000 |
| C | 2.331125000  | 0.810401000  | -4.444182000 | C | 2.161833000  | 1.028425000  | -4.414174000 |
| C | 1.596449000  | 0.679447000  | -5.765760000 | C | 1.363157000  | 0.905049000  | -5.698713000 |
| O | 1.623127000  | -0.305094000 | -6.477475000 | O | 1.337130000  | -0.081796000 | -6.407585000 |
| C | 1.329749000  | 0.455643000  | -3.329240000 | C | 1.201309000  | 0.726347000  | -3.247392000 |
| C | -5.981315000 | -1.887832000 | 4.501144000  | C | -5.834598000 | -2.190193000 | 4.646347000  |
| C | -5.132894000 | -3.139191000 | 4.301083000  | C | -4.825134000 | -3.291415000 | 4.339682000  |
| C | -4.483882000 | -3.583970000 | 5.618062000  | C | -4.186701000 | -3.822093000 | 5.629704000  |
| N | -3.403564000 | -4.552535000 | 5.418511000  | N | -3.036853000 | -4.691222000 | 5.385224000  |
| C | -2.252891000 | -4.224438000 | 4.815843000  | C | -1.850123000 | -4.247113000 | 4.948199000  |
| N | -1.423584000 | -5.172822000 | 4.359605000  | N | -0.895439000 | -5.128013000 | 4.611537000  |
| N | -1.903055000 | -2.945532000 | 4.668505000  | N | -1.603032000 | -2.940436000 | 4.877819000  |
| N | -7.187732000 | 3.020940000  | 0.602939000  | N | -7.404130000 | 2.656571000  | 0.771385000  |
| C | -6.796946000 | 2.984955000  | -0.820457000 | C | -7.031610000 | 2.623479000  | -0.656888000 |
| C | -6.745270000 | 1.546817000  | -1.360369000 | C | -6.910917000 | 1.186289000  | -1.176613000 |
| O | -6.502990000 | 1.296520000  | -2.544838000 | O | -6.726405000 | 0.941548000  | -2.372142000 |
| C | -5.389265000 | 3.630715000  | -0.881444000 | C | -5.663304000 | 3.352514000  | -0.745647000 |
| C | -4.862349000 | 3.445690000  | 0.548136000  | C | -5.135126000 | 3.286799000  | 0.694282000  |
| C | -6.119106000 | 3.673585000  | 1.390274000  | C | -6.412011000 | 3.457460000  | 1.517501000  |
| N | -6.964916000 | 0.613209000  | -0.408864000 | N | -7.006950000 | 0.242472000  | -0.213887000 |
| C | -7.025482000 | -0.810657000 | -0.637816000 | C | -7.018251000 | -1.179061000 | -0.475932000 |
| C | -8.432246000 | -1.323591000 | -0.344827000 | C | -8.397649000 | -1.757127000 | -0.174490000 |
| O | -8.669969000 | -2.401474000 | 0.157330000  | O | -8.581862000 | -2.865014000 | 0.282760000  |
| C | -5.975773000 | -1.555654000 | 0.180516000  | C | -5.919271000 | -1.911042000 | 0.282642000  |
| O | -4.663669000 | -1.313383000 | -0.317764000 | O | -4.636991000 | -1.608410000 | -0.254069000 |
| H | 2.404763000  | -1.936276000 | 3.773362000  | H | 2.778007000  | -2.251898000 | 3.519846000  |
| H | 0.883464000  | -4.085539000 | 0.659394000  | H | 1.282319000  | -4.306335000 | 0.398020000  |
| H | -0.337596000 | -2.840259000 | 0.815722000  | H | -0.070910000 | -3.233552000 | 0.675822000  |
| H | 1.097873000  | -1.119279000 | -0.059113000 | H | 1.130894000  | -1.307038000 | -0.187693000 |
| H | 1.423258000  | -2.503418000 | -1.082968000 | H | 1.579761000  | -2.605428000 | -1.271372000 |
| H | 3.403816000  | -3.081322000 | 0.366723000  | H | 3.651498000  | -3.019739000 | 0.116677000  |
| H | 3.572878000  | -1.491399000 | -0.382032000 | H | 3.628365000  | -1.410153000 | -0.598119000 |
| H | 3.019720000  | -0.359712000 | 1.657877000  | H | 3.047445000  | -0.367105000 | 1.456156000  |
| H | 1.634194000  | 0.395902000  | 3.827233000  | H | 1.949038000  | -0.065756000 | 3.578844000  |
| H | -1.771112000 | -0.921346000 | 2.886688000  | H | -1.369986000 | -1.589109000 | 2.668566000  |
| H | 0.363045000  | 2.130284000  | -0.424825000 | H | 0.185442000  | 2.162841000  | -0.206616000 |
| H | 1.543622000  | 1.547600000  | 1.682585000  | H | 1.621282000  | 1.323346000  | 1.628465000  |
| H | -1.446802000 | -7.644060000 | 0.647122000  | H | -0.867576000 | -7.590466000 | 0.755824000  |
| H | -0.942223000 | -6.564028000 | 1.942771000  | H | -0.655147000 | -6.528848000 | 2.147364000  |
| H | -1.952416000 | -3.973196000 | 1.776462000  | H | -1.909593000 | -4.070962000 | 1.975095000  |
| H | -3.589084000 | -2.822313000 | 0.203179000  | H | -3.532533000 | -3.017777000 | 0.316990000  |
| H | -3.728451000 | -8.140004000 | -0.707518000 | H | -2.919612000 | -8.237651000 | -0.909252000 |
| H | -5.361039000 | -3.541412000 | -1.882012000 | H | -5.077322000 | -3.817415000 | -1.895650000 |
| H | -5.400970000 | -7.801580000 | -2.511145000 | H | -4.490707000 | -7.984533000 | -2.814838000 |
| H | -6.198013000 | -5.524469000 | -3.085209000 | H | -5.545739000 | -5.787142000 | -3.301869000 |
| H | 2.351729000  | -8.350275000 | -1.994891000 | H | 2.280002000  | -8.360776000 | -1.580406000 |
| H | 1.373101000  | -6.047405000 | -1.732512000 | H | 0.289195000  | -6.832005000 | -1.391034000 |
| H | 0.683693000  | -7.240036000 | -0.645427000 | H | -0.125097000 | -8.489806000 | -1.790442000 |
| H | 2.254238000  | -8.497332000 | -4.469597000 | H | 3.713068000  | -6.888059000 | -2.976875000 |
| H | 2.371743000  | -6.797924000 | -3.988401000 | H | 2.591003000  | -5.891993000 | -2.038066000 |
| H | 0.822109000  | -7.464692000 | -4.516274000 | H | 2.295730000  | -6.181475000 | -3.757020000 |
| H | -0.659482000 | -6.234775000 | -3.227031000 | H | -0.039339000 | -6.155640000 | -3.796253000 |
| H | -1.130520000 | -5.830694000 | -1.575596000 | H | -1.481517000 | -6.951369000 | -3.163174000 |
| H | -1.320825000 | -7.480242000 | -2.160011000 | H | -0.372944000 | -7.838426000 | -4.223462000 |
| H | 5.790568000  | -6.904312000 | 0.723207000  | H | 7.720203000  | -6.502928000 | -0.679767000 |
| H | 7.299061000  | -6.858166000 | 0.087122000  | H | 7.972641000  | -5.434676000 | -1.897820000 |
| H | 6.575822000  | -5.394917000 | -1.686088000 | H | 5.811411000  | -4.441052000 | -1.580938000 |
| H | 6.071132000  | -4.425121000 | 1.193223000  | H | 7.511480000  | -4.524381000 | 0.998300000  |
| H | 4.201813000  | -6.214687000 | -1.664253000 | H | 4.786033000  | -6.563732000 | -0.648240000 |
| H | 4.279982000  | -4.440045000 | -1.568489000 | H | 4.442076000  | -5.156616000 | 0.376285000  |
| H | 3.926528000  | -5.400794000 | -0.115511000 | H | 5.689632000  | -6.320144000 | 0.859269000  |
| H | 7.824716000  | -2.670128000 | -2.124472000 | H | 7.793571000  | -2.133632000 | -2.206947000 |

|   |              |              |              |   |              |              |              |
|---|--------------|--------------|--------------|---|--------------|--------------|--------------|
| H | 7.831029000  | -2.266805000 | -3.701195000 | H | 7.864162000  | -1.683750000 | -3.765776000 |
| H | 7.350078000  | -0.046692000 | -3.339859000 | H | 7.252108000  | 0.480276000  | -3.388670000 |
| H | 5.659466000  | -1.613996000 | -1.344242000 | H | 5.686841000  | -1.191470000 | -1.380917000 |
| H | 5.059358000  | 0.989550000  | -2.857466000 | H | 4.906709000  | 1.418884000  | -2.798774000 |
| H | 5.392481000  | 0.869684000  | -1.130689000 | H | 5.282653000  | 1.267077000  | -1.083256000 |
| H | 3.929524000  | 0.142872000  | -1.798036000 | H | 3.848514000  | 0.479393000  | -1.741955000 |
| H | 5.582876000  | -2.739293000 | -3.543554000 | H | 5.619046000  | -2.245482000 | -3.620479000 |
| H | 5.187315000  | -1.207073000 | -4.341678000 | H | 5.110530000  | -0.712612000 | -4.349613000 |
| H | 4.041784000  | -1.944278000 | -3.209071000 | H | 4.042956000  | -1.560182000 | -3.217383000 |
| H | 7.687291000  | -1.669217000 | -0.110725000 | H | 7.796279000  | -1.114090000 | -0.186429000 |
| H | 7.679603000  | 0.856932000  | 1.248748000  | H | 7.550350000  | 1.389334000  | 1.182236000  |
| H | 10.396523000 | -0.003095000 | 0.287378000  | H | 10.354047000 | 0.775800000  | 0.279827000  |
| H | 8.478081000  | -0.463061000 | 3.188666000  | H | 8.389299000  | 0.138113000  | 3.136838000  |
| H | 8.777699000  | -1.863402000 | 2.155138000  | H | 8.899279000  | -1.207215000 | 2.113673000  |
| H | 6.862352000  | -3.042156000 | 3.754526000  | H | 7.155925000  | -2.791979000 | 3.378491000  |
| H | 5.471547000  | -0.057186000 | 1.127859000  | H | 5.374870000  | 0.321011000  | 1.169651000  |
| H | 4.338278000  | -3.333436000 | 3.536719000  | H | 4.711574000  | -3.399182000 | 3.061510000  |
| H | 7.706325000  | 3.248368000  | 1.584911000  | H | 7.448357000  | 3.793183000  | 1.541842000  |
| H | 6.449442000  | 2.730351000  | -0.522945000 | H | 6.214148000  | 3.218491000  | -0.569837000 |
| H | 5.751154000  | 4.339348000  | -0.502609000 | H | 5.415829000  | 4.781219000  | -0.523341000 |
| H | 6.803392000  | 6.144235000  | 1.058092000  | H | 6.387794000  | 6.637095000  | 1.026724000  |
| H | 8.042079000  | 5.642092000  | 2.221100000  | H | 7.649128000  | 6.196283000  | 2.190211000  |
| H | 6.346936000  | 5.201660000  | 2.476264000  | H | 5.978426000  | 5.666572000  | 2.439696000  |
| H | 4.154293000  | 2.634925000  | 0.440035000  | H | 3.937027000  | 2.970765000  | 0.412446000  |
| H | 4.582102000  | 3.838424000  | 1.659166000  | H | 4.308173000  | 4.177530000  | 1.647251000  |
| H | 5.329232000  | 2.233426000  | 1.706524000  | H | 5.151318000  | 2.620592000  | 1.656652000  |
| H | -3.301839000 | 3.535127000  | 8.120526000  | H | -3.698866000 | 3.290819000  | 8.059680000  |
| H | -4.325628000 | 2.601321000  | 7.018160000  | H | -4.338746000 | 2.370164000  | 6.689089000  |
| H | -1.574542000 | 1.730817000  | 8.054880000  | H | -1.833404000 | 1.645310000  | 8.301726000  |
| H | -3.418749000 | 0.366809000  | 6.020861000  | H | -3.012733000 | 0.309531000  | 5.806894000  |
| H | -3.090584000 | -0.217882000 | 7.660653000  | H | -3.016992000 | -0.380690000 | 7.439529000  |
| H | -1.785593000 | -0.170846000 | 6.454437000  | H | -1.481915000 | -0.136675000 | 6.582894000  |
| H | -0.797968000 | 2.052052000  | 5.703554000  | H | -0.563585000 | 2.224320000  | 6.232281000  |
| H | -1.410568000 | 3.576839000  | 6.368754000  | H | -1.467693000 | 3.630445000  | 6.819235000  |
| H | -2.402218000 | 2.639464000  | 5.243917000  | H | -2.066833000 | 2.709574000  | 5.432460000  |
| H | -2.102287000 | 10.248740000 | 1.604952000  | H | -2.765739000 | 10.202486000 | 1.749286000  |
| H | -1.973006000 | 9.592283000  | 3.243575000  | H | -2.569129000 | 9.469578000  | 3.348445000  |
| H | -2.956858000 | 8.360310000  | -0.145473000 | H | -3.528423000 | 8.388238000  | -0.099489000 |
| H | -2.709093000 | 5.866734000  | -0.383374000 | H | -3.173977000 | 5.926965000  | -0.483434000 |
| H | -0.030111000 | 7.457266000  | 4.019356000  | H | -0.544554000 | 7.358123000  | 4.001590000  |
| H | -1.458714000 | 3.720039000  | 0.984653000  | H | -1.753024000 | 3.783327000  | 0.687679000  |
| H | 0.621281000  | 5.110557000  | 4.499156000  | H | 0.223841000  | 5.021028000  | 4.319721000  |
| H | -0.084170000 | 3.269739000  | 3.007035000  | H | -0.364356000 | 3.256090000  | 2.686902000  |
| H | 3.591816000  | 7.011586000  | -1.859759000 | H | 3.087850000  | 7.249440000  | -1.885985000 |
| H | 2.376615000  | 7.514666000  | -0.851435000 | H | 1.884591000  | 7.729522000  | -0.853327000 |
| H | 3.762094000  | 4.914347000  | -0.746403000 | H | 3.367156000  | 5.184441000  | -0.745124000 |
| H | 1.463656000  | 5.985464000  | 0.955429000  | H | 1.097588000  | 6.203026000  | 1.024419000  |
| H | 2.255632000  | 4.414132000  | 1.144939000  | H | 1.958140000  | 4.669070000  | 1.213101000  |
| H | 3.791938000  | 6.740448000  | 1.134060000  | H | 3.400963000  | 7.051306000  | 1.097527000  |
| H | 1.220091000  | 6.546423000  | -2.302155000 | H | 0.732618000  | 6.686008000  | -2.273280000 |
| H | -0.388395000 | 4.089996000  | -2.475736000 | H | -0.768001000 | 4.157825000  | -2.367935000 |
| H | 1.291529000  | 3.975559000  | -4.337454000 | H | 1.030020000  | 4.101357000  | -4.157036000 |
| H | -1.242671000 | 6.605524000  | -3.917730000 | H | -1.723700000 | 6.509650000  | -3.991915000 |
| H | -1.258936000 | 6.656811000  | -2.154602000 | H | -1.773312000 | 6.704880000  | -2.239882000 |
| H | -2.758385000 | 4.716263000  | -2.057261000 | H | -3.148086000 | 4.673397000  | -2.009178000 |
| H | -3.758346000 | 6.899096000  | -3.974385000 | H | -4.274484000 | 6.641258000  | -4.082538000 |
| H | -3.730130000 | 7.044644000  | -2.215768000 | H | -4.256419000 | 6.927827000  | -2.341179000 |
| H | -4.792753000 | 5.856937000  | -2.988516000 | H | -5.239654000 | 5.615487000  | -3.011579000 |
| H | -2.766441000 | 4.741266000  | -5.109874000 | H | -3.120430000 | 4.478365000  | -5.051942000 |
| H | -3.865556000 | 3.806763000  | -4.075381000 | H | -4.174305000 | 3.557341000  | -3.958894000 |
| H | -2.141175000 | 3.448575000  | -4.072908000 | H | -2.431100000 | 3.308654000  | -3.915449000 |
| H | 3.686850000  | 2.343119000  | -4.708309000 | H | 3.525511000  | 2.526503000  | -4.803306000 |
| H | 2.853567000  | 2.433900000  | -3.292389000 | H | 2.826022000  | 2.636380000  | -3.322173000 |
| H | 3.144162000  | 0.073255000  | -4.440815000 | H | 2.951557000  | 0.267151000  | -4.434119000 |
| H | 0.987102000  | 1.573173000  | -6.025474000 | H | 0.760018000  | 1.809583000  | -5.933664000 |
| H | 0.451532000  | 1.105871000  | -3.368350000 | H | 0.329885000  | 1.387569000  | -3.271995000 |
| H | 1.802911000  | 0.597375000  | -2.353027000 | H | 1.713677000  | 0.894669000  | -2.295788000 |
| H | 1.001345000  | -0.580756000 | -3.415154000 | H | 0.857496000  | -0.307899000 | -3.286325000 |
| H | -5.363165000 | -1.043632000 | 4.825833000  | H | -5.346051000 | -1.330484000 | 5.117936000  |
| H | -6.482713000 | -1.599318000 | 3.572716000  | H | -6.323238000 | -1.837481000 | 3.733509000  |
| H | -4.351767000 | -2.939473000 | 3.559974000  | H | -4.047985000 | -2.905454000 | 3.670650000  |



|   |              |              |              |   |              |              |              |
|---|--------------|--------------|--------------|---|--------------|--------------|--------------|
| H | -5.738692000 | -3.962240000 | 3.906471000  | H | -5.303380000 | -4.123743000 | 3.811986000  |
| H | -4.091800000 | -2.722719000 | 6.169943000  | H | -3.876428000 | -2.998746000 | 6.283565000  |
| H | -5.215293000 | -4.055604000 | 6.276478000  | H | -4.908045000 | -4.405799000 | 6.204425000  |
| H | -3.638361000 | -5.532828000 | 5.461966000  | H | -3.209106000 | -5.682585000 | 5.315881000  |
| H | -1.777230000 | -6.102026000 | 4.196513000  | H | -1.160881000 | -6.096762000 | 4.519692000  |
| H | -0.621873000 | -4.847612000 | 3.811439000  | H | -0.144289000 | -4.800032000 | 4.001502000  |
| H | -1.011366000 | -2.752932000 | 4.204475000  | H | -0.701883000 | -2.520618000 | 4.599134000  |
| H | -2.329446000 | -2.221361000 | 5.221931000  | H | -2.307812000 | -2.286545000 | 5.175051000  |
| H | -8.086915000 | 3.469395000  | 0.733244000  | H | -8.350017000 | 2.995393000  | 0.904503000  |
| H | -7.503245000 | 3.522217000  | -1.461391000 | H | -7.773282000 | 3.110462000  | -1.298585000 |
| H | -4.759296000 | 3.171960000  | -1.645178000 | H | -4.995231000 | 2.890918000  | -1.474084000 |
| H | -5.491153000 | 4.695431000  | -1.108941000 | H | -5.828816000 | 4.393095000  | -1.038741000 |
| H | -4.060639000 | 4.139214000  | 0.810314000  | H | -4.390285000 | 4.053381000  | 0.917716000  |
| H | -4.486122000 | 2.426507000  | 0.685146000  | H | -4.685161000 | 2.307696000  | 0.888007000  |
| H | -6.051114000 | 3.230531000  | 2.388741000  | H | -6.314704000 | 3.089197000  | 2.543537000  |
| H | -6.299308000 | 4.751355000  | 1.509755000  | H | -6.690014000 | 4.520678000  | 1.563648000  |
| H | -7.186939000 | 1.024048000  | 0.500764000  | H | -7.220940000 | 0.630972000  | 0.706390000  |
| H | -6.860005000 | -0.983802000 | -1.707617000 | H | -6.866017000 | -1.293283000 | -1.556785000 |
| H | -9.239637000 | -0.620902000 | -0.636882000 | H | -9.237807000 | -1.073704000 | -0.414818000 |
| H | -6.150059000 | -2.629089000 | 0.112314000  | H | -6.061321000 | -2.987420000 | 0.182341000  |
| H | -6.052316000 | -1.261822000 | 1.234943000  | H | -5.968646000 | -1.657795000 | 1.349097000  |
| H | -4.516171000 | -0.360038000 | -0.428347000 | H | -4.499034000 | -0.646894000 | -0.290966000 |
| H | -3.989059000 | 1.987767000  | 8.644783000  | H | -4.332720000 | 1.654555000  | 8.308862000  |
| H | -6.755683000 | -2.045531000 | 5.259797000  | H | -6.617542000 | -2.544516000 | 5.325488000  |
| H | -0.518627000 | 9.841429000  | 2.281956000  | H | -1.149347000 | 9.849411000  | 2.377909000  |
| H | 8.160653000  | 4.208067000  | 0.195608000  | H | 7.841188000  | 4.781644000  | 0.154024000  |
| H | 0.777559000  | -8.960004000 | -2.481265000 | H | 1.908729000  | -8.629615000 | -3.277321000 |
| H | -2.399728000 | -7.559328000 | 2.123690000  | H | -2.001403000 | -7.679237000 | 2.100750000  |
| N | -5.394724000 | 0.345886000  | -5.260968000 | N | -5.604918000 | 0.047253000  | -4.976101000 |
| C | -4.533422000 | -0.777189000 | -4.832599000 | C | -4.594360000 | -0.987456000 | -4.705613000 |
| C | -5.222261000 | -1.426108000 | -3.656437000 | C | -5.223554000 | -2.055742000 | -3.840674000 |
| O | -6.032093000 | -2.335969000 | -3.739026000 | O | -5.688991000 | -3.101479000 | -4.258451000 |
| C | -3.147764000 | -0.224487000 | -4.453108000 | C | -3.369163000 | -0.346967000 | -4.029680000 |
| C | -2.141657000 | -1.282197000 | -4.056694000 | C | -2.252668000 | -1.333855000 | -3.771517000 |
| C | -1.148486000 | -1.686312000 | -4.958077000 | C | -1.241017000 | -1.528654000 | -4.721115000 |
| C | -2.173718000 | -1.883330000 | -2.787696000 | C | -2.222589000 | -2.099631000 | -2.596320000 |
| C | -0.206954000 | -2.655201000 | -4.605127000 | C | -0.222858000 | -2.458964000 | -4.504258000 |
| C | -1.242760000 | -2.861475000 | -2.434966000 | C | -1.216422000 | -3.043956000 | -2.382121000 |
| C | -0.251338000 | -3.247104000 | -3.341210000 | C | -0.209906000 | -3.223217000 | -3.334436000 |
| H | -5.611923000 | 0.927147000  | -4.448880000 | H | -5.952717000 | 0.431526000  | -4.096053000 |
| H | -6.288573000 | -0.026447000 | -5.576941000 | H | -6.403044000 | -0.371455000 | -5.449276000 |
| H | -5.021922000 | -0.939253000 | -2.687681000 | H | -5.307384000 | -1.780813000 | -2.769843000 |
| H | -3.279764000 | 0.489115000  | -3.631249000 | H | -3.690941000 | 0.116027000  | -3.090735000 |
| H | -1.094180000 | -1.219456000 | -5.937144000 | H | -1.235452000 | -0.932306000 | -5.628836000 |
| H | -2.925245000 | -1.585787000 | -2.064838000 | H | -2.991914000 | -1.957831000 | -1.846057000 |
| H | -1.294260000 | -3.318611000 | -1.452170000 | H | -1.222491000 | -3.636484000 | -1.472959000 |
| H | 0.479118000  | -4.000029000 | -3.063133000 | H | 0.580892000  | -3.947266000 | -3.163089000 |
| H | 0.570482000  | -2.928806000 | -5.311553000 | H | 0.568112000  | -2.565441000 | -5.239732000 |
| H | -4.457005000 | -1.496793000 | -5.653786000 | H | -4.300888000 | -1.450582000 | -5.654214000 |
| H | -2.777462000 | 0.344050000  | -5.310876000 | H | -3.024393000 | 0.461751000  | -4.681429000 |
| H | -2.959291000 | -0.351918000 | 0.795135000  | H | -2.831159000 | -0.730842000 | 0.875369000  |
| N | -2.093720000 | 1.314772000  | -1.118232000 | N | -2.281687000 | 1.293569000  | -0.786613000 |
| O | -3.284186000 | 0.980980000  | -1.224766000 | O | -3.434622000 | 0.841693000  | -0.881818000 |
| O | -1.509321000 | 1.972340000  | -1.976827000 | O | -1.865191000 | 2.191533000  | -1.518918000 |
| O | 1.219159000  | -2.933753000 | 5.840660000  | O | 1.949243000  | -3.245195000 | 5.643811000  |
| H | 0.905779000  | -2.015705000 | 5.827405000  | H | 1.503214000  | -2.405692000 | 5.401726000  |
| H | 0.994925000  | -3.223586000 | 4.928169000  | H | 1.779912000  | -3.760358000 | 4.836110000  |

### Int2

|   |              |              |              |
|---|--------------|--------------|--------------|
| C | 1.358708000  | -2.987511000 | 1.705510000  |
| C | 1.033357000  | -3.106646000 | 0.230884000  |
| C | 1.983251000  | -2.326244000 | -0.688370000 |
| C | 3.383596000  | -2.259708000 | -0.067287000 |
| C | 3.291488000  | -1.379646000 | 1.181930000  |
| C | 2.273171000  | -1.891549000 | 2.211805000  |
| O | 0.895373000  | -3.783639000 | 2.506014000  |
| C | 1.476427000  | -0.687075000 | 2.895692000  |
| C | 0.407126000  | -0.172751000 | 1.942235000  |
| C | -0.861729000 | -0.775705000 | 1.934337000  |

### TS3

|   |              |              |              |
|---|--------------|--------------|--------------|
| C | 1.354032000  | -3.054400000 | 1.758730000  |
| C | 1.694377000  | -3.867216000 | 0.525110000  |
| C | 2.558835000  | -3.107057000 | -0.475139000 |
| C | 3.765263000  | -2.540792000 | 0.262632000  |
| C | 3.320393000  | -1.491678000 | 1.286247000  |
| C | 2.195295000  | -1.948176000 | 2.205112000  |
| O | 0.388101000  | -3.424624000 | 2.444564000  |
| C | 1.466345000  | -0.728431000 | 2.857277000  |
| C | 0.380440000  | -0.183186000 | 1.955182000  |
| C | -0.905816000 | -0.750675000 | 1.933977000  |

|   |              |              |              |   |              |              |              |
|---|--------------|--------------|--------------|---|--------------|--------------|--------------|
| C | -1.842502000 | -0.362453000 | 1.045192000  | C | -1.862399000 | -0.309332000 | 1.033077000  |
| C | -1.545625000 | 0.670401000  | 0.148318000  | C | -1.531824000 | 0.715833000  | 0.141704000  |
| C | -0.302135000 | 1.307700000  | 0.138045000  | C | -0.272499000 | 1.321648000  | 0.147161000  |
| C | 0.661636000  | 0.879328000  | 1.048734000  | C | 0.671539000  | 0.864574000  | 1.064457000  |
| O | 0.996755000  | -1.049820000 | 4.123470000  | O | 0.957100000  | -1.019824000 | 4.156280000  |
| C | -0.867541000 | -7.013866000 | 1.914729000  | C | -0.928038000 | -7.061866000 | 1.630401000  |
| C | -1.785757000 | -6.122786000 | 1.144447000  | C | -1.844721000 | -6.170457000 | 0.856417000  |
| C | -2.026208000 | -4.784993000 | 1.360491000  | C | -2.065138000 | -4.825710000 | 1.054774000  |
| C | -2.615326000 | -6.510994000 | 0.031967000  | C | -2.693809000 | -6.565106000 | -0.237954000 |
| N | -2.959655000 | -4.318036000 | 0.454049000  | N | -3.002763000 | -4.360241000 | 0.151824000  |
| C | -3.339952000 | -5.352448000 | -0.373740000 | C | -3.405819000 | -5.401840000 | -0.655454000 |
| C | -2.812123000 | -7.717688000 | -0.662448000 | C | -2.917277000 | -7.780965000 | -0.907799000 |
| C | -4.240701000 | -5.378155000 | -1.443792000 | C | -4.323394000 | -5.433620000 | -1.710267000 |
| C | -3.702153000 | -7.743434000 | -1.731626000 | C | -3.823107000 | -7.813028000 | -1.962880000 |
| C | -4.407770000 | -6.583232000 | -2.117600000 | C | -4.518453000 | -6.649895000 | -2.357780000 |
| C | 2.413603000  | -7.849988000 | -2.032157000 | C | 2.371101000  | -7.783742000 | -2.324020000 |
| C | 0.901745000  | -7.740822000 | -1.773970000 | C | 0.953060000  | -7.415216000 | -1.856267000 |
| C | 3.063964000  | -6.517459000 | -2.424592000 | C | 3.278891000  | -6.567324000 | -2.537329000 |
| C | 0.070798000  | -7.446241000 | -3.026577000 | C | 0.099643000  | -6.723647000 | -2.923686000 |
| N | 7.580780000  | -5.351716000 | -1.330023000 | N | 7.407865000  | -5.209992000 | -1.740618000 |
| C | 6.630682000  | -4.570723000 | -0.523195000 | C | 6.600792000  | -4.587533000 | -0.678322000 |
| C | 7.415364000  | -3.546015000 | 0.263577000  | C | 7.476778000  | -3.591330000 | 0.044957000  |
| O | 7.475500000  | -2.360538000 | -0.028688000 | O | 7.390730000  | -2.380140000 | -0.094975000 |
| C | 5.836193000  | -5.502243000 | 0.388619000  | C | 6.061758000  | -5.662278000 | 0.261823000  |
| N | 8.113042000  | -0.872704000 | -2.711559000 | N | 8.169345000  | -0.772297000 | -2.770946000 |
| C | 7.152506000  | 0.222359000  | -2.503923000 | C | 7.166397000  | 0.267373000  | -2.489187000 |
| C | 7.623265000  | 1.130601000  | -1.370051000 | C | 7.625612000  | 1.123037000  | -1.311936000 |
| O | 7.613353000  | 2.361239000  | -1.459803000 | O | 7.657478000  | 2.355903000  | -1.362516000 |
| C | 5.694573000  | -0.237681000 | -2.238286000 | C | 5.727424000  | -0.259503000 | -2.234254000 |
| C | 4.749942000  | 0.945890000  | -2.006526000 | C | 4.745989000  | 0.878574000  | -1.930816000 |
| C | 5.183350000  | -1.128677000 | -3.375086000 | C | 5.225978000  | -1.111249000 | -3.404172000 |
| N | 7.981574000  | 0.500120000  | -0.222297000 | N | 7.932619000  | 0.445466000  | -0.174966000 |
| C | 8.175750000  | 1.237802000  | 1.012909000  | C | 8.175224000  | 1.153738000  | 1.066482000  |
| C | 9.569217000  | 1.863596000  | 1.035111000  | C | 9.583309000  | 1.750551000  | 1.069571000  |
| O | 10.291340000 | 1.874787000  | 2.009051000  | O | 10.269424000 | 1.854273000  | 2.064043000  |
| C | 7.955586000  | 0.352580000  | 2.240482000  | C | 7.961733000  | 0.273725000  | 2.294722000  |
| C | 6.644376000  | -0.359341000 | 2.218988000  | C | 6.590455000  | -0.302787000 | 2.377645000  |
| N | 6.404145000  | -1.477899000 | 2.998417000  | N | 6.214042000  | -1.149270000 | 3.408102000  |
| C | 5.503522000  | -0.176090000 | 1.487621000  | C | 5.515427000  | -0.256416000 | 1.537048000  |
| C | 5.181576000  | -1.962759000 | 2.756971000  | C | 4.976101000  | -1.616620000 | 3.205487000  |
| N | 4.610753000  | -1.180892000 | 1.833595000  | N | 4.529443000  | -1.078668000 | 2.063542000  |
| C | 6.646612000  | 5.117007000  | 0.680686000  | C | 6.673997000  | 5.052549000  | 0.859696000  |
| C | 5.502124000  | 4.480506000  | -0.121460000 | C | 5.530344000  | 4.441011000  | 0.037321000  |
| C | 6.260559000  | 6.396427000  | 1.430602000  | C | 6.291965000  | 6.307899000  | 1.651150000  |
| C | 4.459521000  | 3.766047000  | 0.745298000  | C | 4.481895000  | 3.701810000  | 0.876380000  |
| C | -3.694429000 | 2.779131000  | 7.377834000  | C | -3.703312000 | 2.580577000  | 7.380401000  |
| C | -2.479379000 | 1.843697000  | 7.364101000  | C | -2.513601000 | 1.613168000  | 7.373292000  |
| C | -2.870724000 | 0.433280000  | 7.820911000  | C | -2.918789000 | 0.240617000  | 7.924135000  |
| C | -1.830994000 | 1.812163000  | 5.972218000  | C | -1.928739000 | 1.476481000  | 5.959389000  |
| C | -2.922647000 | 9.360664000  | 1.984638000  | C | -2.874462000 | 9.314205000  | 2.254298000  |
| C | -2.868282000 | 8.007710000  | 1.339797000  | C | -2.831349000 | 7.981443000  | 1.567180000  |
| C | -3.486044000 | 7.638346000  | 0.170438000  | C | -3.444521000 | 7.656383000  | 0.382128000  |
| C | -2.173254000 | 6.832111000  | 1.817236000  | C | -2.154256000 | 6.782925000  | 2.012495000  |
| N | -3.208037000 | 6.312767000  | -0.119178000 | N | -3.181325000 | 6.336749000  | 0.053878000  |
| C | -2.410428000 | 5.788013000  | 0.874560000  | C | -2.397283000 | 5.771549000  | 1.036062000  |
| C | -1.393256000 | 6.547545000  | 2.952820000  | C | -1.386065000 | 6.453611000  | 3.144069000  |
| C | -1.890751000 | 4.498269000  | 1.033488000  | C | -1.894895000 | 4.470988000  | 1.158810000  |
| C | -0.890308000 | 5.261178000  | 3.125048000  | C | -0.899392000 | 5.156586000  | 3.279425000  |
| C | -1.135741000 | 4.247101000  | 2.174786000  | C | -1.150417000 | 4.175526000  | 2.296528000  |
| N | 2.052384000  | 7.283728000  | -1.117652000 | N | 2.100119000  | 7.313830000  | -0.878798000 |
| C | 1.954417000  | 5.858539000  | -0.818871000 | C | 1.995932000  | 5.877555000  | -0.640395000 |
| C | 1.008698000  | 4.993712000  | -1.636598000 | C | 1.055242000  | 5.050837000  | -1.502477000 |
| O | 1.110441000  | 3.756941000  | -1.619272000 | O | 1.162044000  | 3.815125000  | -1.548454000 |
| C | 1.580511000  | 5.737666000  | 0.670942000  | C | 1.608703000  | 5.694978000  | 0.839773000  |
| O | 2.515664000  | 6.440608000  | 1.471399000  | O | 2.538560000  | 6.360468000  | 1.677522000  |
| N | 0.036751000  | 5.629171000  | -2.320840000 | N | 0.080173000  | 5.715168000  | -2.154297000 |
| C | -0.960989000 | 4.870066000  | -3.042643000 | C | -0.912583000 | 4.986452000  | -2.913790000 |
| C | -0.313871000 | 4.201113000  | -4.256627000 | C | -0.256418000 | 4.366025000  | -4.147934000 |
| O | -0.754314000 | 3.209818000  | -4.799134000 | O | -0.700845000 | 3.405259000  | -4.739671000 |
| C | -2.170413000 | 5.751277000  | -3.439103000 | C | -2.118153000 | 5.884284000  | -3.284404000 |
| C | -3.539552000 | 5.048928000  | -3.323051000 | C | -3.489128000 | 5.181222000  | -3.201431000 |

|   |              |              |              |   |              |              |              |
|---|--------------|--------------|--------------|---|--------------|--------------|--------------|
| C | -4.666049000 | 6.082789000  | -3.451345000 | C | -4.612475000 | 6.221696000  | -3.301737000 |
| C | -3.749307000 | 3.905742000  | -4.322222000 | C | -3.695771000 | 4.073165000  | -4.239910000 |
| N | 2.424819000  | 2.377354000  | -4.371073000 | N | 2.497837000  | 2.510808000  | -4.344572000 |
| C | 2.029074000  | 0.965936000  | -4.392854000 | C | 2.059471000  | 1.110837000  | -4.380833000 |
| C | 1.313198000  | 0.685385000  | -5.702033000 | C | 1.320194000  | 0.878131000  | -5.686503000 |
| O | 1.441658000  | -0.332207000 | -6.358757000 | O | 1.463281000  | -0.097327000 | -6.401434000 |
| C | 1.052723000  | 0.667551000  | -3.240959000 | C | 1.098493000  | 0.826228000  | -3.213603000 |
| C | -5.641243000 | -2.435631000 | 4.880665000  | C | -5.688819000 | -2.556109000 | 4.725164000  |
| C | -4.255427000 | -3.053192000 | 4.696738000  | C | -4.442094000 | -3.429433000 | 4.634348000  |
| C | -3.551157000 | -3.234892000 | 6.046465000  | C | -3.720920000 | -3.524412000 | 5.984783000  |
| N | -2.175229000 | -3.715758000 | 5.925259000  | N | -2.410902000 | -4.169025000 | 5.870171000  |
| C | -1.155045000 | -2.972171000 | 5.476515000  | C | -1.365601000 | -3.588953000 | 5.267030000  |
| N | 0.041934000  | -3.545728000 | 5.240162000  | N | -0.274706000 | -4.312487000 | 4.944246000  |
| N | -1.260202000 | -1.659864000 | 5.294797000  | N | -1.365074000 | -2.285211000 | 4.999565000  |
| N | -7.497251000 | 2.106667000  | 0.821048000  | N | -7.500267000 | 2.134234000  | 0.812463000  |
| C | -7.240003000 | 2.015839000  | -0.629322000 | C | -7.224855000 | 2.093789000  | -0.636792000 |
| C | -7.037488000 | 0.567338000  | -1.081810000 | C | -7.031599000 | 0.659453000  | -1.138960000 |
| O | -6.960564000 | 0.270550000  | -2.277485000 | O | -6.943094000 | 0.401321000  | -2.342657000 |
| C | -5.971657000 | 2.880718000  | -0.883075000 | C | -5.941055000 | 2.948633000  | -0.840920000 |
| C | -5.379616000 | 3.075446000  | 0.520779000  | C | -5.356573000 | 3.064112000  | 0.574562000  |
| C | -6.626667000 | 3.146906000  | 1.400423000  | C | -6.610138000 | 3.125763000  | 1.445867000  |
| N | -6.959816000 | -0.328111000 | -0.071387000 | N | -6.974230000 | -0.270445000 | -0.158346000 |
| C | -6.929509000 | -1.761093000 | -0.271462000 | C | -6.941664000 | -1.695293000 | -0.407890000 |
| C | -8.248838000 | -2.375025000 | 0.186436000  | C | -8.278501000 | -2.322825000 | -0.026722000 |
| O | -8.340477000 | -3.451495000 | 0.737320000  | O | -8.392663000 | -3.420833000 | 0.475371000  |
| C | -5.735221000 | -2.417058000 | 0.411440000  | C | -5.775028000 | -2.378297000 | 0.296275000  |
| O | -4.512404000 | -2.075434000 | -0.231104000 | O | -4.529610000 | -2.003532000 | -0.279292000 |
| H | 2.790998000  | -2.341519000 | 3.054782000  | H | 2.597975000  | -2.518268000 | 3.308261000  |
| H | 1.053128000  | -4.177007000 | 0.002720000  | H | 2.229270000  | -4.763059000 | 0.871925000  |
| H | -0.006148000 | -2.792765000 | 0.095943000  | H | 0.748795000  | -4.221946000 | 0.105526000  |
| H | 1.607966000  | -1.307727000 | -0.850484000 | H | 1.985886000  | -2.296023000 | -0.940046000 |
| H | 2.021984000  | -2.800125000 | -1.670641000 | H | 2.884433000  | -3.768285000 | -1.282426000 |
| H | 3.731324000  | -3.264968000 | 0.197740000  | H | 4.283784000  | -3.346005000 | 0.793302000  |
| H | 4.103937000  | -1.836394000 | -0.767183000 | H | 4.482672000  | -2.092485000 | -0.425873000 |
| H | 3.005329000  | -0.379583000 | 0.849995000  | H | 3.028507000  | -0.585802000 | 0.743382000  |
| H | 2.244430000  | 0.105508000  | 2.975605000  | H | 2.232211000  | 0.050557000  | 2.958467000  |
| H | -1.075967000 | -1.572531000 | 2.634828000  | H | -1.150163000 | -1.556351000 | 2.609014000  |
| H | -0.093129000 | 2.116862000  | -0.552821000 | H | -0.035968000 | 2.129888000  | -0.536054000 |
| H | 1.620777000  | 1.387499000  | 1.069578000  | H | 1.646424000  | 1.341381000  | 1.089832000  |
| H | -0.134042000 | -7.499487000 | 1.259237000  | H | -0.228187000 | -7.590380000 | 0.972321000  |
| H | -0.315602000 | -6.445965000 | 2.668790000  | H | -0.337305000 | -6.484236000 | 2.347681000  |
| H | -1.578193000 | -4.125660000 | 2.088787000  | H | -1.586942000 | -4.159642000 | 1.756729000  |
| H | -3.301400000 | -3.365583000 | 0.367337000  | H | -3.345823000 | -3.406218000 | 0.083925000  |
| H | -2.270488000 | -8.613531000 | -0.371931000 | H | -2.384269000 | -8.679135000 | -0.608068000 |
| H | -4.783216000 | -4.494146000 | -1.750005000 | H | -4.859522000 | -4.549720000 | -2.029438000 |
| H | -3.857442000 | -8.667803000 | -2.280258000 | H | -3.999790000 | -8.744446000 | -2.493072000 |
| H | -5.090589000 | -6.622137000 | -2.960564000 | H | -5.217191000 | -6.698001000 | -3.187611000 |
| H | 2.903456000  | -8.230534000 | -1.126873000 | H | 2.833171000  | -8.443763000 | -1.579137000 |
| H | 0.719967000  | -6.958017000 | -1.023988000 | H | 1.024866000  | -6.768788000 | -0.970618000 |
| H | 0.546326000  | -8.677210000 | -1.325251000 | H | 0.435090000  | -8.324265000 | -1.525497000 |
| H | 4.146822000  | -6.621147000 | -2.552448000 | H | 4.287296000  | -6.863180000 | -2.844955000 |
| H | 2.891702000  | -5.757945000 | -1.651663000 | H | 3.372546000  | -5.992465000 | -1.608913000 |
| H | 2.658927000  | -6.129243000 | -3.364960000 | H | 2.884411000  | -5.893440000 | -3.305034000 |
| H | 0.338527000  | -6.487047000 | -3.478891000 | H | 0.556743000  | -5.793974000 | -3.273311000 |
| H | -0.995761000 | -7.410567000 | -2.786546000 | H | -0.891631000 | -6.479405000 | -2.532091000 |
| H | 0.222597000  | -8.223307000 | -3.785180000 | H | -0.032917000 | -7.374679000 | -3.795918000 |
| H | 8.230635000  | -5.857501000 | -0.730594000 | H | 8.207225000  | -5.703981000 | -1.347382000 |
| H | 8.133481000  | -4.744022000 | -1.930236000 | H | 7.770693000  | -4.507924000 | -2.381132000 |
| H | 5.965295000  | -4.030339000 | -1.204490000 | H | 5.784187000  | -4.037699000 | -1.153904000 |
| H | 8.017678000  | -3.945282000 | 1.104844000  | H | 8.282678000  | -4.028576000 | 0.668798000  |
| H | 5.311349000  | -6.245112000 | -0.216756000 | H | 5.479096000  | -6.386238000 | -0.312189000 |
| H | 5.102361000  | -4.951618000 | 0.983339000  | H | 5.423017000  | -5.232440000 | 1.038324000  |
| H | 6.503179000  | -6.029042000 | 1.079961000  | H | 6.882504000  | -6.193802000 | 0.755588000  |
| H | 7.884877000  | -1.647457000 | -2.090804000 | H | 8.013349000  | -1.571083000 | -2.159082000 |
| H | 8.007460000  | -1.231520000 | -3.655952000 | H | 8.030600000  | -1.118292000 | -3.716289000 |
| H | 7.163502000  | 0.854822000  | -3.397271000 | H | 7.145074000  | 0.949963000  | -3.344564000 |
| H | 5.737361000  | -0.845236000 | -1.325874000 | H | 5.800198000  | -0.913204000 | -1.357812000 |
| H | 4.677027000  | 1.569606000  | -2.902606000 | H | 4.609642000  | 1.521607000  | -2.806050000 |
| H | 5.080009000  | 1.595742000  | -1.192893000 | H | 5.084665000  | 1.523383000  | -1.115552000 |
| H | 3.741640000  | 0.594877000  | -1.769502000 | H | 3.763279000  | 0.479591000  | -1.660945000 |
| H | 5.804083000  | -2.019358000 | -3.502596000 | H | 5.871821000  | -1.975282000 | -3.582523000 |

|   |              |              |              |   |              |              |              |
|---|--------------|--------------|--------------|---|--------------|--------------|--------------|
| H | 5.174737000  | -0.580860000 | -4.324628000 | H | 5.181478000  | -0.521799000 | -4.327386000 |
| H | 4.160753000  | -1.463776000 | -3.173808000 | H | 4.218660000  | -1.488036000 | -3.198654000 |
| H | 8.011071000  | -0.512703000 | -0.180395000 | H | 7.938895000  | -0.569566000 | -0.157994000 |
| H | 7.472609000  | 2.082543000  | 1.010101000  | H | 7.493277000  | 2.015763000  | 1.095307000  |
| H | 9.872775000  | 2.313777000  | 0.071243000  | H | 9.932110000  | 2.092598000  | 0.077057000  |
| H | 8.043282000  | 0.973237000  | 3.136937000  | H | 8.186455000  | 0.870683000  | 3.182826000  |
| H | 8.759282000  | -0.389192000 | 2.301800000  | H | 8.687489000  | -0.548885000 | 2.285790000  |
| H | 7.051055000  | -1.878675000 | 3.666048000  | H | 6.777437000  | -1.374678000 | 4.218031000  |
| H | 5.253505000  | 0.566161000  | 0.751090000  | H | 5.377626000  | 0.259916000  | 0.605981000  |
| H | 4.737996000  | -2.804338000 | 3.259337000  | H | 4.411859000  | -2.272776000 | 3.868427000  |
| H | 7.037017000  | 4.377784000  | 1.394854000  | H | 7.064672000  | 4.291260000  | 1.550084000  |
| H | 5.931439000  | 3.768193000  | -0.830269000 | H | 5.961600000  | 3.747332000  | -0.688856000 |
| H | 5.013406000  | 5.263174000  | -0.718139000 | H | 5.046559000  | 5.241463000  | -0.539441000 |
| H | 5.949493000  | 7.176858000  | 0.726189000  | H | 5.977906000  | 7.110634000  | 0.973577000  |
| H | 7.100688000  | 6.786927000  | 2.014261000  | H | 7.135314000  | 6.678942000  | 2.242760000  |
| H | 5.422903000  | 6.227106000  | 2.114660000  | H | 5.457607000  | 6.117504000  | 2.333811000  |
| H | 3.675947000  | 3.313966000  | 0.126415000  | H | 3.693900000  | 3.284297000  | 0.238954000  |
| H | 3.974044000  | 4.457219000  | 1.438694000  | H | 4.002821000  | 4.368806000  | 1.597490000  |
| H | 4.926798000  | 2.965659000  | 1.332708000  | H | 4.940164000  | 2.870530000  | 1.426641000  |
| H | -3.416107000 | 3.796063000  | 7.081429000  | H | -3.412142000 | 3.571357000  | 7.015383000  |
| H | -4.461321000 | 2.425148000  | 6.677780000  | H | -4.506395000 | 2.208256000  | 6.732368000  |
| H | -1.737892000 | 2.236242000  | 8.073811000  | H | -1.732635000 | 2.026061000  | 8.026585000  |
| H | -3.620406000 | 0.008406000  | 7.139928000  | H | -3.699167000 | -0.204790000 | 7.294289000  |
| H | -3.312115000 | 0.443048000  | 8.822892000  | H | -3.316498000 | 0.314632000  | 8.941789000  |
| H | -2.004087000 | -0.236336000 | 7.843373000  | H | -2.066837000 | -0.448546000 | 7.945212000  |
| H | -0.925841000 | 1.195073000  | 5.965780000  | H | -1.044278000 | 0.829734000  | 5.953193000  |
| H | -1.553905000 | 2.817070000  | 5.635287000  | H | -1.638580000 | 2.449134000  | 5.546197000  |
| H | -2.528107000 | 1.401107000  | 5.229843000  | H | -2.671018000 | 1.039688000  | 5.277956000  |
| H | -3.541118000 | 10.047075000 | 1.400157000  | H | -3.480275000 | 10.026088000 | 1.687286000  |
| H | -3.342812000 | 9.308131000  | 2.996348000  | H | -3.302822000 | 9.234879000  | 3.260738000  |
| H | -4.110402000 | 8.223275000  | -0.489877000 | H | -4.056756000 | 8.269065000  | -0.264235000 |
| H | -3.604350000 | 5.791370000  | -0.883331000 | H | -3.571111000 | 5.846196000  | -0.733723000 |
| H | -1.192562000 | 7.320764000  | 3.688951000  | H | -1.181438000 | 7.201184000  | 3.905219000  |
| H | -2.072584000 | 3.729177000  | 0.291561000  | H | -2.080504000 | 3.727044000  | 0.392538000  |
| H | -0.289774000 | 5.032063000  | 4.000340000  | H | -0.308007000 | 4.893047000  | 4.151261000  |
| H | -0.718978000 | 3.256553000  | 2.328613000  | H | -0.746313000 | 3.175742000  | 2.421706000  |
| H | 2.398611000  | 7.469113000  | -2.053058000 | H | 2.454014000  | 7.535726000  | -1.803373000 |
| H | 1.172318000  | 7.775495000  | -0.984558000 | H | 1.219460000  | 7.801447000  | -0.734633000 |
| H | 2.946306000  | 5.421299000  | -0.955116000 | H | 2.987481000  | 5.442865000  | -0.786931000 |
| H | 0.562028000  | 6.127253000  | 0.814667000  | H | 0.590100000  | 6.081267000  | 0.991053000  |
| H | 1.581850000  | 4.689980000  | 0.974601000  | H | 1.604555000  | 4.635274000  | 1.098857000  |
| H | 2.752168000  | 7.221606000  | 0.941544000  | H | 2.782816000  | 7.161745000  | 1.182617000  |
| H | 0.035159000  | 6.637404000  | -2.366407000 | H | 0.074096000  | 6.724397000  | -2.150963000 |
| H | -1.303756000 | 4.061011000  | -2.390082000 | H | -1.261478000 | 4.152639000  | -2.297432000 |
| H | 0.605674000  | 4.699080000  | -4.624042000 | H | 0.672365000  | 4.870668000  | -4.482391000 |
| H | -2.044731000 | 6.151858000  | -4.452606000 | H | -1.985790000 | 6.321870000  | -4.281602000 |
| H | -2.173388000 | 6.614432000  | -2.764216000 | H | -2.123833000 | 6.722130000  | -2.578374000 |
| H | -3.586917000 | 4.591506000  | -2.323064000 | H | -3.544354000 | 4.690899000  | -2.217601000 |
| H | -4.661163000 | 6.531065000  | -4.451218000 | H | -4.599951000 | 6.703944000  | -4.285620000 |
| H | -4.565342000 | 6.899393000  | -2.727956000 | H | -4.514712000 | 7.012793000  | -2.550111000 |
| H | -5.643253000 | 5.614290000  | -3.299484000 | H | -5.591761000 | 5.750746000  | -3.172382000 |
| H | -3.687710000 | 4.276986000  | -5.352012000 | H | -3.628475000 | 4.479099000  | -5.256150000 |
| H | -4.741319000 | 3.464129000  | -4.181256000 | H | -4.689523000 | 3.629524000  | -4.118675000 |
| H | -3.001034000 | 3.122159000  | -4.203458000 | H | -2.949863000 | 3.284156000  | -4.144396000 |
| H | 3.380486000  | 2.494492000  | -4.690514000 | H | 3.460072000  | 2.601872000  | -4.652477000 |
| H | 2.350702000  | 2.761876000  | -3.432834000 | H | 2.424295000  | 2.888528000  | -3.403737000 |
| H | 2.877354000  | 0.273365000  | -4.324748000 | H | 2.890396000  | 0.395091000  | -4.341398000 |
| H | 0.629500000  | 1.501908000  | -6.011436000 | H | 0.612151000  | 1.692858000  | -5.939842000 |
| H | 0.142581000  | 1.265136000  | -3.335568000 | H | 0.208418000  | 1.456601000  | -3.278561000 |
| H | 1.525761000  | 0.927097000  | -2.289688000 | H | 1.603581000  | 1.056395000  | -2.271779000 |
| H | 0.780637000  | -0.388575000 | -3.225967000 | H | 0.792078000  | -0.219838000 | -3.204133000 |
| H | -5.572803000 | -1.440144000 | 5.332306000  | H | -5.428925000 | -1.527754000 | 5.000577000  |
| H | -6.156065000 | -2.332891000 | 3.920863000  | H | -6.214873000 | -2.523896000 | 3.766810000  |
| H | -3.646370000 | -2.416321000 | 4.044912000  | H | -3.757441000 | -3.019852000 | 3.882650000  |
| H | -4.328711000 | -4.027669000 | 4.201070000  | H | -4.700843000 | -4.440954000 | 4.302259000  |
| H | -3.553321000 | -2.300444000 | 6.618158000  | H | -3.594337000 | -2.536230000 | 6.437586000  |
| H | -4.084872000 | -3.964591000 | 6.658663000  | H | -4.301759000 | -4.110897000 | 6.698982000  |
| H | -2.015166000 | -4.706924000 | 6.019181000  | H | -2.394223000 | -5.176404000 | 5.930789000  |
| H | 0.048949000  | -4.531225000 | 5.023452000  | H | -0.367565000 | -5.317641000 | 4.973545000  |
| H | 0.671781000  | -2.980904000 | 4.667206000  | H | 0.227811000  | -3.956854000 | 4.123276000  |
| H | -0.457145000 | -1.186402000 | 4.805879000  | H | -0.522069000 | -1.821076000 | 4.627978000  |

|   |              |              |              |   |              |              |              |
|---|--------------|--------------|--------------|---|--------------|--------------|--------------|
| H | -2.109221000 | -1.169316000 | 5.515864000  | H | -2.127855000 | -1.701407000 | 5.298177000  |
| H | -8.477890000 | 2.275869000  | 1.016180000  | H | -8.478817000 | 2.320833000  | 1.001745000  |
| H | -8.076466000 | 2.388396000  | -1.231496000 | H | -8.048091000 | 2.499125000  | -1.235776000 |
| H | -5.278970000 | 2.405032000  | -1.578276000 | H | -5.251687000 | 2.496220000  | -1.554734000 |
| H | -6.270712000 | 3.845351000  | -1.303829000 | H | -6.221499000 | 3.937877000  | -1.215039000 |
| H | -4.757236000 | 3.968024000  | 0.604803000  | H | -4.713100000 | 3.936051000  | 0.704702000  |
| H | -4.775449000 | 2.207130000  | 0.800462000  | H | -4.776057000 | 2.168973000  | 0.818104000  |
| H | -6.424309000 | 2.934023000  | 2.454730000  | H | -6.423020000 | 2.860739000  | 2.491138000  |
| H | -7.076701000 | 4.149224000  | 1.336876000  | H | -7.035413000 | 4.140494000  | 1.423841000  |
| H | -7.105403000 | 0.090187000  | 0.848487000  | H | -7.134230000 | 0.116698000  | 0.772793000  |
| H | -6.870982000 | -1.916942000 | -1.356720000 | H | -6.840307000 | -1.812661000 | -1.495096000 |
| H | -9.138476000 | -1.747473000 | -0.027069000 | H | -9.158386000 | -1.683912000 | -0.247084000 |
| H | -5.833673000 | -3.501466000 | 0.350388000  | H | -5.864368000 | -3.459320000 | 0.181783000  |
| H | -5.712829000 | -2.137919000 | 1.472817000  | H | -5.797297000 | -2.147137000 | 1.369003000  |
| H | -4.410356000 | -1.109324000 | -0.280634000 | H | -4.432578000 | -1.035960000 | -0.297063000 |
| H | -4.148229000 | 2.828215000  | 8.373430000  | H | -4.115335000 | 2.698146000  | 8.388434000  |
| H | -6.268809000 | -3.055611000 | 5.529814000  | H | -6.389677000 | -2.936200000 | 5.476002000  |
| H | -1.924367000 | 9.805097000  | 2.078403000  | H | -1.871664000 | 9.743143000  | 2.369119000  |
| H | 7.476409000  | 5.341038000  | -0.001279000 | H | 7.503931000  | 5.296999000  | 0.184775000  |
| H | 2.594514000  | -8.595504000 | -2.817991000 | H | 2.306008000  | -8.365553000 | -3.253296000 |
| H | -1.413008000 | -7.816487000 | 2.426841000  | H | -1.478618000 | -7.829130000 | 2.189404000  |
| N | -5.634847000 | -0.620824000 | -4.778254000 | N | -5.694207000 | -0.514050000 | -4.900231000 |
| C | -4.549922000 | -1.580753000 | -4.529589000 | C | -4.535387000 | -1.384427000 | -4.643461000 |
| C | -5.099655000 | -2.720764000 | -3.700566000 | C | -4.982017000 | -2.514695000 | -3.742850000 |
| O | -5.399114000 | -3.818574000 | -4.135925000 | O | -5.351685000 | -3.603391000 | -4.149965000 |
| C | -3.376050000 | -0.873972000 | -3.829987000 | C | -3.397653000 | -0.555040000 | -4.025600000 |
| C | -2.182576000 | -1.783819000 | -3.653881000 | C | -2.157995000 | -1.374590000 | -3.747019000 |
| C | -1.145491000 | -1.792143000 | -4.594982000 | C | -1.189299000 | -1.566835000 | -4.740931000 |
| C | -2.117960000 | -2.681684000 | -2.578601000 | C | -1.966185000 | -1.987815000 | -2.500743000 |
| C | -0.066317000 | -2.668561000 | -4.465160000 | C | -0.056566000 | -2.344546000 | -4.496251000 |
| C | -1.056664000 | -3.580630000 | -2.459135000 | C | -0.838623000 | -2.772604000 | -2.252264000 |
| C | -0.022967000 | -3.570515000 | -3.399362000 | C | 0.123728000  | -2.948160000 | -3.249161000 |
| H | -6.014318000 | -0.274910000 | -3.895025000 | H | -6.059727000 | -0.146233000 | -4.020130000 |
| H | -6.399259000 | -1.085660000 | -5.263749000 | H | -6.442737000 | -1.058759000 | -5.323488000 |
| H | -5.290146000 | -2.454628000 | -2.640788000 | H | -5.027157000 | -2.264816000 | -2.663738000 |
| H | -3.722876000 | -0.498171000 | -2.861416000 | H | -3.762133000 | -0.094804000 | -3.100915000 |
| H | -1.171763000 | -1.095640000 | -5.427967000 | H | -1.310137000 | -1.085642000 | -5.707393000 |
| H | -2.904278000 | -2.675830000 | -1.833010000 | H | -2.707103000 | -1.855869000 | -1.722225000 |
| H | -1.042029000 | -4.284852000 | -1.633989000 | H | -0.724025000 | -3.246500000 | -1.282679000 |
| H | 0.812444000  | -4.256112000 | -3.298022000 | H | 1.012222000  | -3.539179000 | -3.054230000 |
| H | 0.743536000  | -2.625471000 | -5.186231000 | H | 0.699343000  | -2.444411000 | -5.267970000 |
| H | -4.216274000 | -1.993258000 | -5.488230000 | H | -4.207685000 | -1.822379000 | -5.592868000 |
| H | -3.112750000 | -0.000650000 | -4.434517000 | H | -3.171923000 | 0.260377000  | -4.719701000 |
| H | -2.812906000 | -0.836661000 | 1.039884000  | H | -2.841521000 | -0.764912000 | 1.015309000  |
| N | -2.566465000 | 1.108174000  | -0.785313000 | N | -2.531870000 | 1.172488000  | -0.803556000 |
| O | -3.676247000 | 0.549630000  | -0.765299000 | O | -3.639057000 | 0.607502000  | -0.824350000 |
| O | -2.310051000 | 2.026421000  | -1.565921000 | O | -2.261507000 | 2.108952000  | -1.556790000 |
| O | 3.153431000  | -2.108679000 | 5.245028000  | O | 2.759807000  | -2.771149000 | 4.610217000  |
| H | 3.214265000  | -1.963036000 | 6.197375000  | H | 2.416038000  | -3.656356000 | 4.791723000  |
| H | 2.320833000  | -1.639714000 | 4.953910000  | H | 1.615968000  | -1.672208000 | 4.557579000  |

TS4

|   |              |              |              |
|---|--------------|--------------|--------------|
| C | 1.665950000  | -3.181607000 | 2.110894000  |
| C | 2.168866000  | -4.204363000 | 1.108976000  |
| C | 2.445554000  | -3.610904000 | -0.268424000 |
| C | 3.371706000  | -2.400974000 | -0.142633000 |
| C | 2.850663000  | -1.425495000 | 0.895907000  |
| C | 1.928491000  | -1.822871000 | 1.896635000  |
| O | 1.024600000  | -3.645802000 | 3.114869000  |
| C | 1.344087000  | -0.650567000 | 2.701030000  |
| C | 0.240103000  | -0.051546000 | 1.858177000  |
| C | -1.039794000 | -0.627797000 | 1.869238000  |
| C | -2.016272000 | -0.189983000 | 0.991440000  |
| C | -1.699715000 | 0.828228000  | 0.084352000  |
| C | -0.447697000 | 1.446918000  | 0.069758000  |
| C | 0.511493000  | 1.004964000  | 0.975712000  |
| O | 0.826827000  | -0.958727000 | 3.986526000  |
| C | -0.842639000 | -7.113312000 | 1.457491000  |
| C | -1.703661000 | -6.093557000 | 0.792538000  |

P

|   |              |              |              |
|---|--------------|--------------|--------------|
| C | 2.643969000  | -2.602341000 | 2.464843000  |
| C | 3.065423000  | -3.825158000 | 1.683479000  |
| C | 2.806847000  | -3.759994000 | 0.182517000  |
| C | 3.254508000  | -2.402572000 | -0.361716000 |
| C | 2.636544000  | -1.298463000 | 0.430763000  |
| C | 2.299895000  | -1.376941000 | 1.739426000  |
| O | 2.632818000  | -2.686445000 | 3.702477000  |
| C | 1.610579000  | -0.156762000 | 2.392314000  |
| C | 0.389497000  | 0.183576000  | 1.563787000  |
| C | -0.746791000 | -0.633727000 | 1.670492000  |
| C | -1.859774000 | -0.401020000 | 0.882600000  |
| C | -1.816626000 | 0.650897000  | -0.037796000 |
| C | -0.705562000 | 1.482703000  | -0.164812000 |
| C | 0.395349000  | 1.245706000  | 0.655413000  |
| O | 1.166970000  | -0.345190000 | 3.730983000  |
| C | -0.019792000 | -7.189111000 | 1.685935000  |
| C | -0.984715000 | -6.247654000 | 1.045159000  |

|   |              |              |              |   |              |              |              |
|---|--------------|--------------|--------------|---|--------------|--------------|--------------|
| C | -1.833182000 | -4.753650000 | 1.086758000  | C | -1.352158000 | -4.989598000 | 1.469228000  |
| C | -2.605093000 | -6.363616000 | -0.296073000 | C | -1.752550000 | -6.517031000 | -0.143234000 |
| N | -2.767810000 | -4.176703000 | 0.243700000  | N | -2.310321000 | -4.464853000 | 0.619321000  |
| C | -3.257359000 | -5.138991000 | -0.612583000 | C | -2.576806000 | -5.380377000 | -0.374303000 |
| C | -2.911191000 | -7.519099000 | -1.036809000 | C | -1.823128000 | -7.605162000 | -1.031629000 |
| C | -4.198074000 | -5.051510000 | -1.643735000 | C | -3.462975000 | -5.315511000 | -1.452988000 |
| C | -3.841838000 | -7.431333000 | -2.065963000 | C | -2.695159000 | -7.537015000 | -2.113287000 |
| C | -4.478228000 | -6.207216000 | -2.364281000 | C | -3.509220000 | -6.401545000 | -2.319045000 |
| C | 2.468109000  | -7.710288000 | -2.507734000 | C | 3.261318000  | -7.486195000 | -2.337688000 |
| C | 1.136551000  | -7.172337000 | -1.958824000 | C | 1.790704000  | -7.111548000 | -2.091234000 |
| C | 3.338002000  | -6.644701000 | -3.183171000 | C | 4.105357000  | -6.337915000 | -2.903906000 |
| C | 0.164822000  | -6.675419000 | -3.033209000 | C | 1.011262000  | -6.750130000 | -3.358994000 |
| N | 7.653258000  | -5.252880000 | -1.589012000 | N | 7.828253000  | -4.423093000 | -1.854702000 |
| C | 6.668432000  | -4.520193000 | -0.777220000 | C | 7.064399000  | -3.750777000 | -0.789647000 |
| C | 7.421231000  | -3.535100000 | 0.088211000  | C | 7.969199000  | -2.723822000 | -0.141167000 |
| O | 7.491748000  | -2.338203000 | -0.145277000 | O | 7.973447000  | -1.536634000 | -0.426978000 |
| C | 5.847954000  | -5.499971000 | 0.056368000  | C | 6.554411000  | -4.778461000 | 0.212812000  |
| N | 8.173023000  | -0.684274000 | -2.741898000 | N | 8.063753000  | 0.251254000  | -2.996134000 |
| C | 7.195784000  | 0.382263000  | -2.467546000 | C | 6.943286000  | 1.127980000  | -2.620671000 |
| C | 7.652471000  | 1.216423000  | -1.273330000 | C | 7.368883000  | 2.034208000  | -1.460429000 |
| O | 7.655004000  | 2.451394000  | -1.293261000 | O | 7.324191000  | 3.268430000  | -1.525797000 |
| C | 5.737626000  | -0.114610000 | -2.253394000 | C | 5.615452000  | 0.397719000  | -2.269577000 |
| C | 4.773424000  | 1.040471000  | -1.959642000 | C | 4.522597000  | 1.389171000  | -1.852282000 |
| C | 5.255410000  | -0.926729000 | -3.460429000 | C | 5.148462000  | -0.474408000 | -3.439109000 |
| N | 7.996060000  | 0.518940000  | -0.161152000 | N | 7.759073000  | 1.406060000  | -0.324360000 |
| C | 8.191971000  | 1.189463000  | 1.110398000  | C | 7.901358000  | 2.156443000  | 0.910685000  |
| C | 9.583511000  | 1.817311000  | 1.167868000  | C | 8.969623000  | 3.230500000  | 0.770560000  |
| O | 10.238112000 | 1.921605000  | 2.183603000  | O | 8.999413000  | 4.227216000  | 1.461639000  |
| C | 7.960929000  | 0.249845000  | 2.294074000  | C | 8.274037000  | 1.207624000  | 2.066103000  |
| C | 6.576206000  | -0.304567000 | 2.317085000  | C | 7.329809000  | 0.049145000  | 2.207352000  |
| N | 6.134180000  | -1.188645000 | 3.286194000  | N | 7.722054000  | -1.127793000 | 2.813621000  |
| C | 5.517857000  | -0.163905000 | 1.453823000  | C | 6.028861000  | -0.184510000 | 1.806508000  |
| C | 4.863647000  | -1.562455000 | 3.003495000  | C | 6.680336000  | -2.004419000 | 2.755896000  |
| N | 4.480038000  | -0.948890000 | 1.895365000  | N | 5.635634000  | -1.464438000 | 2.150463000  |
| C | 6.658452000  | 5.079547000  | 0.996737000  | C | 5.892980000  | 5.821286000  | 0.729554000  |
| C | 5.524242000  | 4.491418000  | 0.144396000  | C | 4.833331000  | 5.043482000  | -0.062435000 |
| C | 6.264695000  | 6.311884000  | 1.818113000  | C | 5.364935000  | 7.018604000  | 1.526918000  |
| C | 4.473558000  | 3.721680000  | 0.952499000  | C | 3.907282000  | 4.184760000  | 0.805068000  |
| C | -3.983321000 | 1.713088000  | 7.696370000  | C | -4.087694000 | 0.964432000  | 7.795494000  |
| C | -2.509418000 | 1.404787000  | 7.408712000  | C | -2.617915000 | 1.226166000  | 7.446510000  |
| C | -2.348260000 | -0.014578000 | 6.841085000  | C | -2.001757000 | 0.011204000  | 6.740571000  |
| C | -1.905673000 | 2.441179000  | 6.450485000  | C | -2.469383000 | 2.484670000  | 6.580448000  |
| C | -2.927505000 | 9.225691000  | 2.479295000  | C | -4.104015000 | 8.787977000  | 2.322943000  |
| C | -2.881501000 | 7.916540000  | 1.750890000  | C | -3.924546000 | 7.483660000  | 1.606799000  |
| C | -3.475725000 | 7.630334000  | 0.546373000  | C | -4.502707000 | 7.117566000  | 0.416111000  |
| C | -2.219752000 | 6.702332000  | 2.173503000  | C | -3.125793000 | 6.355832000  | 2.031624000  |
| N | -3.212660000 | 6.319525000  | 0.183583000  | N | -4.101278000 | 5.839441000  | 0.062766000  |
| C | -2.452083000 | 5.721150000  | 1.164947000  | C | -3.264338000 | 5.341985000  | 1.038491000  |
| C | -1.475312000 | 6.336702000  | 3.309752000  | C | -2.328776000 | 6.088953000  | 3.159602000  |
| C | -1.963284000 | 4.413915000  | 1.262333000  | C | -2.632798000 | 4.098332000  | 1.143374000  |
| C | -1.002713000 | 5.032195000  | 3.419433000  | C | -1.715040000 | 4.845249000  | 3.277574000  |
| C | -1.244080000 | 4.080440000  | 2.405762000  | C | -1.865356000 | 3.859408000  | 2.279052000  |
| N | 2.068991000  | 7.343930000  | -0.693891000 | N | 0.996326000  | 7.454416000  | -0.863450000 |
| C | 1.975807000  | 5.901821000  | -0.490436000 | C | 1.116165000  | 6.012776000  | -0.670320000 |
| C | 1.050697000  | 5.086544000  | -1.379976000 | C | 0.308190000  | 5.080790000  | -1.557477000 |
| O | 1.162185000  | 3.851955000  | -1.446126000 | O | 0.612781000  | 3.880801000  | -1.658564000 |
| C | 1.571202000  | 5.679808000  | 0.980554000  | C | 0.757035000  | 5.726932000  | 0.801970000  |
| O | 2.481818000  | 6.337576000  | 1.845109000  | O | 1.566977000  | 6.506697000  | 1.664544000  |
| N | 0.080070000  | 5.758362000  | -2.028867000 | N | -0.778741000 | 5.595758000  | -2.160523000 |
| C | -0.921916000 | 5.042719000  | -2.789658000 | C | -1.696478000 | 4.734166000  | -2.878599000 |
| C | -0.276613000 | 4.419927000  | -4.027127000 | C | -0.989609000 | 4.140941000  | -4.095185000 |
| O | -0.718102000 | 3.448532000  | -4.604124000 | O | -1.310272000 | 3.095329000  | -4.620183000 |
| C | -2.107808000 | 5.968353000  | -3.157503000 | C | -2.973900000 | 5.513976000  | -3.277914000 |
| C | -3.493053000 | 5.289464000  | -3.129646000 | C | -4.279219000 | 4.693185000  | -3.237115000 |
| C | -4.593275000 | 6.357060000  | -3.200380000 | C | -5.484263000 | 5.637796000  | -3.341967000 |
| C | -3.702471000 | 4.237475000  | -4.224376000 | C | -4.367516000 | 3.596860000  | -4.304513000 |
| N | 2.482289000  | 2.639435000  | -4.280704000 | N | 1.978059000  | 2.723797000  | -4.355785000 |
| C | 2.084889000  | 1.229080000  | -4.346525000 | C | 1.730993000  | 1.279319000  | -4.402905000 |
| C | 1.362143000  | 0.997541000  | -5.661238000 | C | 1.004187000  | 0.937075000  | -5.691574000 |
| O | 1.529212000  | 0.033162000  | -6.385730000 | O | 1.202102000  | -0.068127000 | -6.349798000 |
| C | 1.117240000  | 0.894241000  | -3.197309000 | C | 0.842148000  | 0.832955000  | -3.228608000 |

|   |              |              |              |   |              |              |              |
|---|--------------|--------------|--------------|---|--------------|--------------|--------------|
| C | -5.645748000 | -2.724671000 | 4.653760000  | C | -5.268595000 | -3.338885000 | 4.874914000  |
| C | -4.495188000 | -3.704710000 | 4.444485000  | C | -3.862717000 | -3.791993000 | 4.467228000  |
| C | -3.722837000 | -3.936123000 | 5.747220000  | C | -2.924402000 | -3.815157000 | 5.679515000  |
| N | -2.552308000 | -4.797463000 | 5.567991000  | N | -1.598160000 | -4.373427000 | 5.401160000  |
| C | -1.446450000 | -4.419993000 | 4.912397000  | C | -0.528606000 | -3.703693000 | 4.956641000  |
| N | -0.548628000 | -5.337263000 | 4.526873000  | N | 0.613302000  | -4.363610000 | 4.729303000  |
| N | -1.203848000 | -3.131663000 | 4.664355000  | N | -0.588460000 | -2.391805000 | 4.718053000  |
| N | -7.514933000 | 2.037129000  | 0.850395000  | N | -7.823994000 | 1.020738000  | 0.984386000  |
| C | -7.212916000 | 2.042275000  | -0.595056000 | C | -7.520237000 | 1.042000000  | -0.460677000 |
| C | -6.974291000 | 0.627471000  | -1.132838000 | C | -7.091846000 | -0.339241000 | -0.975411000 |
| O | -6.823600000 | 0.409084000  | -2.337947000 | O | -6.885000000 | -0.559406000 | -2.171962000 |
| C | -5.964614000 | 2.952024000  | -0.758777000 | C | -6.401447000 | 2.102392000  | -0.639645000 |
| C | -5.393718000 | 3.034542000  | 0.664512000  | C | -5.823378000 | 2.247696000  | 0.775364000  |
| C | -6.655147000 | 3.027800000  | 1.526942000  | C | -7.063659000 | 2.094817000  | 1.655661000  |
| N | -6.964105000 | -0.331183000 | -0.179180000 | N | -6.982139000 | -1.270433000 | -0.000030000 |
| C | -6.898236000 | -1.748812000 | -0.458401000 | C | -6.732635000 | -2.675256000 | -0.231374000 |
| C | -8.231464000 | -2.411948000 | -0.129054000 | C | -7.982741000 | -3.488497000 | 0.086776000  |
| O | -8.335599000 | -3.525801000 | 0.339149000  | O | -7.962560000 | -4.581948000 | 0.611115000  |
| C | -5.736625000 | -2.416579000 | 0.270025000  | C | -5.528810000 | -3.162922000 | 0.572758000  |
| O | -4.487178000 | -1.987750000 | -0.257789000 | O | -4.333932000 | -2.516317000 | 0.149987000  |
| H | 2.090289000  | -3.296885000 | 4.505996000  | H | 4.139804000  | -3.913904000 | 1.883477000  |
| H | 3.076038000  | -4.662519000 | 1.527570000  | H | 2.586307000  | -4.692165000 | 2.149363000  |
| H | 1.414262000  | -4.994891000 | 1.059537000  | H | 1.736263000  | -3.890689000 | -0.013683000 |
| H | 1.499967000  | -3.301330000 | -0.723333000 | H | 3.329279000  | -4.575552000 | -0.323232000 |
| H | 2.893485000  | -4.357222000 | -0.930610000 | H | 4.347469000  | -2.301629000 | -0.290739000 |
| H | 4.373130000  | -2.731853000 | 0.144032000  | H | 2.993464000  | -2.286314000 | -1.417480000 |
| H | 3.477501000  | -1.885652000 | -1.100669000 | H | 2.454632000  | -0.363855000 | -0.094019000 |
| H | 2.768797000  | -0.400026000 | 0.549655000  | H | 2.310180000  | 0.684755000  | 2.362953000  |
| H | 2.142413000  | 0.096326000  | 2.804148000  | H | -0.755558000 | -1.463680000 | 2.364702000  |
| H | -1.262504000 | -1.431545000 | 2.558996000  | H | -0.676842000 | 2.288205000  | -0.886002000 |
| H | -0.221463000 | 2.247610000  | -0.624467000 | H | 1.263782000  | 1.890888000  | 0.566960000  |
| H | 1.483963000  | 1.486432000  | 0.985723000  | H | 0.788575000  | -7.469047000 | 0.999234000  |
| H | -0.316447000 | -7.730000000 | 0.720653000  | H | 0.439121000  | -6.743838000 | 2.573969000  |
| H | -0.082380000 | -6.647495000 | 2.089812000  | H | -1.000516000 | -4.423767000 | 2.318994000  |
| H | -1.319523000 | -4.160124000 | 1.829486000  | H | -2.788417000 | -3.575151000 | 0.703889000  |
| H | -3.104507000 | -3.219979000 | 0.262788000  | H | -1.202651000 | -8.483082000 | -0.876069000 |
| H | -2.421152000 | -8.462185000 | -0.811462000 | H | -4.088732000 | -4.450803000 | -1.606766000 |
| H | -4.683693000 | -4.118435000 | -1.884520000 | H | -2.754436000 | -8.368222000 | -2.809720000 |
| H | -4.083429000 | -8.313848000 | -2.651115000 | H | -4.184555000 | -6.365685000 | -3.168438000 |
| H | -5.193241000 | -6.152425000 | -3.178735000 | H | 3.703199000  | -7.822213000 | -1.390934000 |
| H | 3.034311000  | -8.162749000 | -1.683657000 | H | 1.745446000  | -6.270830000 | -1.385459000 |
| H | 1.340993000  | -6.360175000 | -1.247746000 | H | 1.288328000  | -7.949950000 | -1.592855000 |
| H | 0.646904000  | -7.965672000 | -1.380225000 | H | 5.161757000  | -6.615442000 | -2.980377000 |
| H | 4.288341000  | -7.066365000 | -3.526506000 | H | 4.044350000  | -5.451350000 | -2.261716000 |
| H | 3.570892000  | -5.829994000 | -2.487571000 | H | 3.767943000  | -6.040546000 | -3.901803000 |
| H | 2.839345000  | -6.202588000 | -4.051525000 | H | 1.420461000  | -5.861615000 | -3.849270000 |
| H | 0.583424000  | -5.845247000 | -3.609130000 | H | -0.037966000 | -6.547438000 | -3.125738000 |
| H | -0.769640000 | -6.328696000 | -2.583218000 | H | 1.042098000  | -7.573218000 | -4.083021000 |
| H | -0.079881000 | -7.479075000 | -3.737871000 | H | 8.630469000  | -4.912830000 | -1.461184000 |
| H | 8.288956000  | -5.778958000 | -0.991528000 | H | 8.190611000  | -3.740954000 | -2.517433000 |
| H | 8.219344000  | -4.608899000 | -2.136935000 | H | 6.232654000  | -3.214943000 | -1.258807000 |
| H | 6.025118000  | -3.948449000 | -1.454455000 | H | 8.722771000  | -3.130095000 | 0.564285000  |
| H | 7.992678000  | -3.976463000 | 0.930041000  | H | 5.931569000  | -5.517044000 | -0.297620000 |
| H | 5.341112000  | -6.209026000 | -0.602817000 | H | 5.968561000  | -4.295485000 | 0.996697000  |
| H | 5.097821000  | -4.978250000 | 0.655627000  | H | 7.389603000  | -5.303070000 | 0.689932000  |
| H | 6.492857000  | -6.063483000 | 0.739343000  | H | 8.093945000  | -0.546284000 | -2.362344000 |
| H | 7.961703000  | -1.493532000 | -2.159837000 | H | 7.883433000  | -0.133055000 | -3.919660000 |
| H | 8.058758000  | -0.996540000 | -3.701918000 | H | 6.755442000  | 1.808776000  | -3.457181000 |
| H | 7.205944000  | 1.073720000  | -3.316126000 | H | 5.827167000  | -0.263474000 | -1.418944000 |
| H | 5.761394000  | -0.787722000 | -1.387206000 | H | 4.304133000  | 2.101385000  | -2.655865000 |
| H | 4.687381000  | 1.708390000  | -2.822517000 | H | 4.802376000  | 1.963635000  | -0.965295000 |
| H | 5.091540000  | 1.653696000  | -1.113312000 | H | 3.592403000  | 0.860685000  | -1.625467000 |
| H | 3.772639000  | 0.657647000  | -1.738682000 | H | 5.883420000  | -1.244706000 | -3.689248000 |
| H | 5.881309000  | -1.806091000 | -3.634183000 | H | 4.974486000  | 0.133088000  | -4.335505000 |
| H | 5.264780000  | -0.316177000 | -4.371264000 | H | 4.210319000  | -0.980707000 | -3.190690000 |
| H | 4.229956000  | -1.277385000 | -3.304913000 | H | 7.774783000  | 0.393222000  | -0.278782000 |
| H | 7.984404000  | -0.495232000 | -0.163801000 | H | 6.961817000  | 2.669326000  | 1.152223000  |
| H | 7.489557000  | 2.034678000  | 1.156081000  | H | 9.756076000  | 3.006883000  | 0.020985000  |
| H | 9.953134000  | 2.187219000  | 0.192153000  | H | 8.308919000  | 1.804577000  | 2.984018000  |
| H | 8.179963000  | 0.802640000  | 3.212179000  | H | 9.287181000  | 0.819755000  | 1.902782000  |
| H | 8.684622000  | -0.573928000 | 2.250148000  | H | 8.629788000  | -1.311614000 | 3.217850000  |

|   |              |              |              |   |              |              |              |
|---|--------------|--------------|--------------|---|--------------|--------------|--------------|
| H | 6.667704000  | -1.501491000 | 4.086142000  | H | 5.365523000  | 0.481511000  | 1.273476000  |
| H | 5.439288000  | 0.419444000  | 0.555411000  | H | 6.733534000  | -2.999650000 | 3.172462000  |
| H | 4.261566000  | -2.220607000 | 3.614841000  | H | 6.418589000  | 5.131463000  | 1.402863000  |
| H | 7.040984000  | 4.298889000  | 1.669617000  | H | 5.347614000  | 4.400262000  | -0.782692000 |
| H | 5.964093000  | 3.823766000  | -0.600798000 | H | 4.236634000  | 5.755967000  | -0.649239000 |
| H | 5.041577000  | 5.308634000  | -0.409724000 | H | 4.910231000  | 7.760302000  | 0.859357000  |
| H | 5.961348000  | 7.133987000  | 1.159120000  | H | 6.170324000  | 7.513524000  | 2.079428000  |
| H | 7.098564000  | 6.665543000  | 2.433378000  | H | 4.596620000  | 6.719914000  | 2.247939000  |
| H | 5.419852000  | 6.102324000  | 2.482124000  | H | 3.178316000  | 3.650813000  | 0.184936000  |
| H | 3.692487000  | 3.318301000  | 0.297715000  | H | 3.349653000  | 4.793534000  | 1.521543000  |
| H | 3.985253000  | 4.364185000  | 1.689630000  | H | 4.483504000  | 3.435087000  | 1.361780000  |
| H | 4.932943000  | 2.877381000  | 1.480919000  | H | -4.528935000 | 1.816668000  | 8.323103000  |
| H | -4.103727000 | 2.713758000  | 8.125087000  | H | -4.675360000 | 0.794024000  | 6.884851000  |
| H | -4.572905000 | 1.672072000  | 6.772185000  | H | -2.066338000 | 1.388646000  | 8.382920000  |
| H | -1.957004000 | 1.454219000  | 8.357417000  | H | -2.542995000 | -0.184706000 | 5.804420000  |
| H | -2.889302000 | -0.106505000 | 5.889804000  | H | -2.062640000 | -0.886021000 | 7.366424000  |
| H | -2.748127000 | -0.767121000 | 7.530044000  | H | -0.948392000 | 0.181706000  | 6.492972000  |
| H | -1.294028000 | -0.249950000 | 6.655204000  | H | -1.417057000 | 2.691488000  | 6.356360000  |
| H | -0.844378000 | 2.241230000  | 6.265102000  | H | -2.887374000 | 3.364637000  | 7.080819000  |
| H | -1.991952000 | 3.456054000  | 6.853442000  | H | -2.994477000 | 2.363242000  | 5.624867000  |
| H | -2.421976000 | 2.423246000  | 5.482615000  | H | -4.781127000 | 9.446752000  | 1.772500000  |
| H | -3.518339000 | 9.960701000  | 1.925999000  | H | -4.520067000 | 8.641715000  | 3.327046000  |
| H | -3.373807000 | 9.116850000  | 3.475143000  | H | -5.177522000 | 7.673992000  | -0.218730000 |
| H | -4.072984000 | 8.265448000  | -0.092244000 | H | -4.459193000 | 5.315453000  | -0.718976000 |
| H | -3.603708000 | 5.850161000  | -0.616472000 | H | -2.202298000 | 6.841278000  | 3.932960000  |
| H | -1.279925000 | 7.061584000  | 4.094911000  | H | -2.744553000 | 3.354771000  | 0.364300000  |
| H | -2.143268000 | 3.694222000  | 0.472816000  | H | -1.105227000 | 4.627198000  | 4.149196000  |
| H | -0.433914000 | 4.738258000  | 4.296509000  | H | -1.368396000 | 2.901286000  | 2.392859000  |
| H | -0.854310000 | 3.073260000  | 2.512846000  | H | 1.306322000  | 7.756085000  | -1.781254000 |
| H | 2.436569000  | 7.590634000  | -1.606758000 | H | 0.051641000  | 7.795516000  | -0.704228000 |
| H | 1.181507000  | 7.820061000  | -0.553768000 | H | 2.162615000  | 5.739720000  | -0.824524000 |
| H | 2.973306000  | 5.480371000  | -0.633761000 | H | -0.310883000 | 5.941733000  | 0.955759000  |
| H | 0.545333000  | 6.049268000  | 1.127463000  | H | 0.920850000  | 4.672973000  | 1.031610000  |
| H | 1.578064000  | 4.614298000  | 1.214830000  | H | 1.679923000  | 7.351751000  | 1.195448000  |
| H | 2.720591000  | 7.153627000  | 1.371905000  | H | -0.966228000 | 6.585068000  | -2.092992000 |
| H | 0.065523000  | 6.767062000  | -1.998854000 | H | -1.974540000 | 3.897558000  | -2.231692000 |
| H | -1.289074000 | 4.213868000  | -2.177339000 | H | -0.154193000 | 4.752152000  | -4.489922000 |
| H | 0.640302000  | 4.932622000  | -4.380182000 | H | -2.853069000 | 5.971929000  | -4.267646000 |
| H | -1.944646000 | 6.437937000  | -4.135606000 | H | -3.075650000 | 6.341441000  | -2.566619000 |
| H | -2.116079000 | 6.781490000  | -2.423025000 | H | -4.315624000 | 4.180011000  | -2.264475000 |
| H | -3.577412000 | 4.754705000  | -2.171654000 | H | -5.493396000 | 6.140967000  | -4.315468000 |
| H | -4.554909000 | 6.883166000  | -4.160935000 | H | -5.468066000 | 6.417378000  | -2.572248000 |
| H | -4.492067000 | 7.111160000  | -2.412115000 | H | -6.422235000 | 5.083006000  | -3.242483000 |
| H | -5.583707000 | 5.900993000  | -3.107565000 | H | -4.301151000 | 4.031046000  | -5.309291000 |
| H | -3.597115000 | 4.688711000  | -5.218180000 | H | -5.327364000 | 3.075609000  | -4.225758000 |
| H | -4.711155000 | 3.817735000  | -4.149923000 | H | -3.566902000 | 2.865080000  | -4.199641000 |
| H | -2.981740000 | 3.423815000  | -4.145626000 | H | 2.932113000  | 2.936580000  | -4.627036000 |
| H | 3.433940000  | 2.765911000  | -4.608989000 | H | 1.823429000  | 3.088434000  | -3.419244000 |
| H | 2.423659000  | 2.987045000  | -3.327302000 | H | 2.654460000  | 0.686805000  | -4.382644000 |
| H | 2.934046000  | 0.535349000  | -4.309337000 | H | 0.239050000  | 1.687389000  | -5.977584000 |
| H | 0.638061000  | 1.800150000  | -5.909462000 | H | -0.130845000 | 1.328488000  | -3.266971000 |
| H | 0.200788000  | 1.484142000  | -3.275656000 | H | 1.324357000  | 1.110592000  | -2.287882000 |
| H | 1.591737000  | 1.139578000  | -2.243321000 | H | 0.689368000  | -0.247184000 | -3.244127000 |
| H | 0.858150000  | -0.164912000 | -3.201658000 | H | -5.252048000 | -2.326666000 | 5.293112000  |
| H | -5.274705000 | -1.744468000 | 4.972667000  | H | -5.942590000 | -3.334198000 | 4.013786000  |
| H | -6.213641000 | -2.582977000 | 3.729644000  | H | -3.457994000 | -3.129447000 | 3.692868000  |
| H | -3.813664000 | -3.323609000 | 3.675372000  | H | -3.899316000 | -4.797044000 | 4.032180000  |
| H | -4.870714000 | -4.668718000 | 4.083274000  | H | -2.808674000 | -2.815876000 | 6.109662000  |
| H | -3.407385000 | -2.987043000 | 6.194152000  | H | -3.353436000 | -4.434760000 | 6.470783000  |
| H | -4.357204000 | -4.422337000 | 6.490845000  | H | -1.503777000 | -5.374391000 | 5.484530000  |
| H | -2.692481000 | -5.790193000 | 5.683311000  | H | 0.701271000  | -5.332561000 | 4.989074000  |
| H | -0.820360000 | -6.306858000 | 4.496981000  | H | 1.452746000  | -3.862565000 | 4.440301000  |
| H | 0.202620000  | -5.019538000 | 3.908492000  | H | 0.212090000  | -1.840302000 | 4.399094000  |
| H | -0.360420000 | -2.864626000 | 4.151983000  | H | -1.440806000 | -1.885044000 | 4.887022000  |
| H | -1.783649000 | -2.409860000 | 5.057264000  | H | -8.818856000 | 1.100332000  | 1.152047000  |
| H | -8.499657000 | 2.203919000  | 1.025438000  | H | -8.394996000 | 1.308814000  | -1.064573000 |
| H | -8.043568000 | 2.433423000  | -1.193902000 | H | -5.663670000 | 1.802073000  | -1.383549000 |
| H | -5.257760000 | 2.555754000  | -1.487714000 | H | -6.847403000 | 3.048853000  | -0.960662000 |
| H | -6.282284000 | 3.944573000  | -1.092610000 | H | -5.310661000 | 3.197633000  | 0.936158000  |
| H | -4.777102000 | 3.919540000  | 0.831103000  | H | -5.116819000 | 1.437662000  | 0.982461000  |
| H | -4.790491000 | 2.148450000  | 0.884348000  | H | -6.827364000 | 1.811865000  | 2.686180000  |



|   |              |              |              |   |              |              |              |
|---|--------------|--------------|--------------|---|--------------|--------------|--------------|
| H | -6.467273000 | 2.729115000  | 2.562977000  | H | -7.624452000 | 3.040530000  | 1.683800000  |
| H | -7.108723000 | 4.030136000  | 1.539570000  | H | -7.241219000 | -0.911418000 | 0.921258000  |
| H | -7.152040000 | 0.031947000  | 0.756786000  | H | -6.553660000 | -2.802904000 | -1.304514000 |
| H | -6.764312000 | -1.842302000 | -1.543992000 | H | -8.932521000 | -2.995040000 | -0.205810000 |
| H | -9.118299000 | -1.785557000 | -0.357117000 | H | -5.388709000 | -4.233196000 | 0.418907000  |
| H | -5.789929000 | -3.496988000 | 0.134085000  | H | -5.707287000 | -2.992173000 | 1.642249000  |
| H | -5.801315000 | -2.204191000 | 1.345051000  | H | -4.492798000 | -1.562259000 | 0.060527000  |
| H | -4.468704000 | -1.018123000 | -0.333201000 | H | -4.194525000 | 0.079506000  | 8.432126000  |
| H | -4.412269000 | 0.990012000  | 8.398469000  | H | -5.693850000 | -4.008812000 | 5.629447000  |
| H | -6.341332000 | -3.084993000 | 5.419288000  | H | -3.150874000 | 9.315865000  | 2.448464000  |
| H | -1.924030000 | 9.643495000  | 2.625591000  | H | 6.657251000  | 6.180434000  | 0.028213000  |
| H | 7.496183000  | 5.343831000  | 0.339145000  | H | 3.306259000  | -8.345116000 | -3.020732000 |
| H | 2.261716000  | -8.520373000 | -3.220249000 | H | -0.510274000 | -8.120264000 | 1.994779000  |
| H | -1.427107000 | -7.798301000 | 2.085142000  | N | -5.597436000 | -1.107290000 | -4.875749000 |
| N | -5.625861000 | -0.417038000 | -4.948798000 | C | -4.466186000 | -1.954306000 | -4.445969000 |
| C | -4.488395000 | -1.314017000 | -4.681160000 | C | -4.959455000 | -2.841188000 | -3.310800000 |
| C | -4.977863000 | -2.429387000 | -3.788717000 | O | -5.587877000 | -3.874242000 | -3.470753000 |
| O | -5.373070000 | -3.508771000 | -4.194626000 | C | -3.300122000 | -1.046729000 | -4.017013000 |
| C | -3.341098000 | -0.509871000 | -4.048687000 | C | -2.035832000 | -1.779564000 | -3.621294000 |
| C | -2.111925000 | -1.346005000 | -3.773811000 | C | -1.042394000 | -2.043046000 | -4.575340000 |
| C | -1.119754000 | -1.496104000 | -4.751937000 | C | -1.818515000 | -2.204402000 | -2.302393000 |
| C | -1.951005000 | -2.013876000 | -2.551173000 | C | 0.133125000  | -2.708488000 | -4.223938000 |
| C | 0.006578000  | -2.285656000 | -4.515885000 | C | -0.643786000 | -2.870409000 | -1.944918000 |
| C | -0.831047000 | -2.813707000 | -2.313343000 | C | 0.337057000  | -3.124501000 | -2.905239000 |
| C | 0.154788000  | -2.946962000 | -3.294113000 | H | -5.985076000 | -0.636537000 | -4.055660000 |
| H | -6.000781000 | -0.060538000 | -4.067648000 | H | -6.342570000 | -1.709905000 | -5.220973000 |
| H | -6.375115000 | -0.943418000 | -5.393657000 | H | -4.786546000 | -2.435883000 | -2.297542000 |
| H | -5.038417000 | -2.166385000 | -2.713706000 | H | -3.650683000 | -0.424610000 | -3.186732000 |
| H | -3.707945000 | -0.055896000 | -3.122555000 | H | -1.177711000 | -1.699115000 | -5.596742000 |
| H | -1.217886000 | -0.972213000 | -5.698590000 | H | -2.572953000 | -2.018088000 | -1.547436000 |
| H | -2.709444000 | -1.914037000 | -1.783450000 | H | -0.506171000 | -3.193844000 | -0.918073000 |
| H | -0.739235000 | -3.333318000 | -1.364529000 | H | 1.250425000  | -3.643074000 | -2.631289000 |
| H | 1.034185000  | -3.554661000 | -3.106547000 | H | 0.897607000  | -2.879977000 | -4.975187000 |
| H | 0.779577000  | -2.353835000 | -5.274169000 | H | -4.170113000 | -2.592356000 | -5.285606000 |
| H | -4.160599000 | -1.757781000 | -5.627811000 | H | -3.094431000 | -0.371554000 | -4.852795000 |
| H | -3.102209000 | 0.310044000  | -4.732995000 | H | -2.732405000 | -1.030406000 | 0.970080000  |
| H | -2.996427000 | -0.641836000 | 0.999030000  | N | -2.958691000 | 0.871467000  | -0.901752000 |
| N | -2.700732000 | 1.253367000  | -0.868681000 | O | -3.909760000 | 0.077465000  | -0.848927000 |
| O | -3.777868000 | 0.635389000  | -0.921367000 | O | -2.948029000 | 1.833320000  | -1.673204000 |
| O | -2.461775000 | 2.212803000  | -1.605042000 | H | 1.946629000  | -0.290870000 | 4.331671000  |
| O | 2.640653000  | -2.715709000 | 5.076092000  | O | 3.386991000  | -0.539281000 | 5.212024000  |
| H | 1.521148000  | -1.430657000 | 4.489822000  | H | 3.225608000  | -0.623166000 | 6.161736000  |
| H | 2.513389000  | -3.026680000 | 5.982057000  | H | 3.327337000  | -1.446776000 | 4.852282000  |
